# Supplementary material
Source: PubMed Central journal article supplement (PMC7228721)
Supplement: mmc1.pdf [file mmc1.pdf]

# THE LANCET

## Supplementary appendix

This translation in Spanish was submitted by the authors and we reproduce it as supplied. It has not been peer reviewed. *The Lancet's* editorial processes have only been applied to the original in English, which should serve as reference for this manuscript.

Los autores nos proporcionaron esta traducción al español y la reproducimos tal como nos fue entregada. No la hemos revisado. Los procesos editoriales de *The Lancet* se han aplicado únicamente al original en inglés, que debe servir de referencia para este manuscrito.

Supplement to: Kaplan HS, Trumble BC, Stieglitz J, et al. Voluntary collective isolation as a best response to COVID-19 for indigenous populations? A case study and protocol from the Bolivian Amazon. *Lancet* 2020; published online May 15. [https://doi.org/10.1016/S0140-6736\(20\)31104-1](https://doi.org/10.1016/S0140-6736(20)31104-1).

## ¿Aislamiento colectivo voluntario como una mejor respuesta a COVID-19 para las poblaciones indígenas? Un estudio de caso y protocolo de la Amazonía Boliviana

Hillard S. Kaplan\*, PhD<sup>1,2</sup>, Benjamin C. Trumble, PhD<sup>2,3</sup>, Jonathan Stieglitz, PhD<sup>2,4</sup>, Roberta Mendez Mamany<sup>1,2</sup>, Maguin Gutierrez Cayuba<sup>5</sup>, Leonardina Maito Moye<sup>6</sup>, Sarah Alami, MA<sup>2,14</sup>, Thomas Kraft, PhD<sup>2,14</sup>, Raul Quispe Gutierrez, MD<sup>2</sup>, Juan Copajira Adrian, MD<sup>2</sup>, Randall C. Thompson, MD<sup>7,8</sup>, Gregory S. Thomas, MD<sup>9,10</sup>, David E. Michalik, DO<sup>11,14</sup>, Daniel Eid Rodriguez†, MD<sup>2,13</sup>, Michael D. Gurven\*, PhD<sup>2,14</sup>.

<sup>1</sup>Economic Science Institute, Chapman University, Orange, CA, USA

<sup>2</sup>Tsimane Health and Life History Project, San Borja, Bolivia

<sup>3</sup>School of Human Evolution and Social Change, Center for Evolution and Medicine, Arizona State University, Tempe, AZ, USA

<sup>4</sup>Institute for Advanced Study in Toulouse, Toulouse, France

<sup>5</sup>Gran Consejo Tsimane, San Borja, Bolivia

<sup>6</sup>Asamblea Legislativa Departamental, Trinidad, Bolivia

<sup>7</sup>Saint Luke's Mid America Heart Institute, Kansas City, MO, USA

<sup>8</sup>University of Missouri–Kansas City, Kansas City, MO, USA

<sup>9</sup>MemorialCare, Southern California, USA

<sup>10</sup>Division of Cardiology, University of California at Irvine, CA, USA

<sup>11</sup>Miller Women's and Children's Hospital Long Beach, CA, USA

<sup>12</sup>Division of Pediatric Infectious Diseases, University of California at Irvine, CA, USA

<sup>13</sup>Faculty of Medicine, Universidad de San Simón, Cochabamba, Bolivia

<sup>14</sup>Department of Anthropology, University of California, Santa Barbara CA, USA

\*Corresponding authors: [gurven@anth.ucsb.edu](mailto:gurven@anth.ucsb.edu), +1(805)455-7238  
[hkaplan@chapman.edu](mailto:hkaplan@chapman.edu), +1(505)228-7309

†Daniel Eid Rodriguez completed this translation.

## Resumen

Las comunidades indígenas de todo el mundo comparten características comunes que los hacen especialmente vulnerables a las complicaciones y mortalidad por la enfermedad de coronavirus 19 (COVID-19). Ellos también poseen atributos de resistencia que se pueden aprovechar para promover los esfuerzos de prevención. ¿Cómo pueden las comunidades indígenas mitigar mejor los posibles efectos devastadores de COVID-19? En Bolivia, donde casi la mitad de la población afirma tener orígenes indígenas, no se han esbozado pautas específicas para las comunidades indígenas que habitan los territorios comunales nativos. En este artículo de Salud Pública, describimos los esfuerzos de colaboración como antropólogos, médicos, líderes indígenas y funcionarios locales para desarrollar e implementar un plan multifase de prevención y contención para el COVID-19, centrado en el aislamiento colectivo voluntario y rastreo de los contactos entre los Tsimane recolectores-horticultores en la Amazonia boliviana. La Fase I involucra educación, alcances y preparación. La Fase II se enfoca en la contención, el manejo del paciente y la cuarentena. Las características de este plan podrían ser exportados y adaptados a las circunstancias locales en otros lugares para prevenir la mortalidad generalizada en las comunidades indígenas.

## Introducción

Los 370 millones de indígenas del mundo que viven en 90 países representan cerca del 5% de la población mundial.<sup>1</sup> Sus formas de vida, su idioma y su cultura han estado amenazadas por las muchas facetas del colonialismo y la globalización, y sus medios de subsistencia y sus vidas están ahora nuevamente en juego en medio de la pandemia del coronavirus 2019 (COVID-19). El síndrome respiratorio agudo grave del coronavirus 2 (SARS-CoV-2) ha causado el COVID-19 en más de 200 países y territorios, con el número de casos confirmados y muertes más altas en los Estados Unidos y Europa.<sup>2</sup>

Los pueblos indígenas de todo el mundo comparten características comunes que los hacen especialmente vulnerables a COVID-19. Las poblaciones indígenas sufren tasas más altas de pobreza extrema, de morbilidad y mortalidad comparado con sus vecinos no indígenas en todo el espectro de países de ingresos bajos a altos.<sup>3</sup> Estas condiciones colocan a los indígenas en mayor riesgo de complicaciones y muerte por COVID-19. Las infecciones respiratorias ya son una fuente importante de morbilidad y mortalidad en muchas poblaciones indígenas en países de bajos ingresos. Como un claro indicador de lo que podría ocurrir, la pandemia de influenza H1N1 de 2009 resultó en una mortalidad 3-6 veces mayor entre las poblaciones indígenas comparado con las poblaciones no-indígenas de las Américas y el Pacífico.<sup>4</sup>

Al 7 de mayo de 2020, Bolivia tenía 2,081 casos confirmados COVID-19 y 102 muertes, en gran parte concentradas en La Paz Santa Cruz. La respuesta del gobierno nacional boliviano a COVID-19 comenzó el 12 de marzo de 2020 e incluyó el cierre de la frontera, la suspensión del transporte interprovincial e interdepartamental y la cuarentena a nivel nacional (Decretos 4196 y 4199). Las pruebas han sido limitadas y se han centrado principalmente en centros urbanos. El Departamento de Beni, hogar de más de 18 poblaciones indígenas, es principalmente rural, con su primer caso confirmado de COVID-19 reportado el 20 de abril de 2020. Esta región de bosques y sabanas de tierras bajas una vez fue testigo de una civilización grande y sofisticada, identificada como uno de los cinco principales centros de domesticación temprana de plantas: el primero en domesticar mandioca y calabaza hace unos 10.000 años.<sup>5</sup> A pesar del hecho de que casi la mitad de los bolivianos se considera que es de origen indígena, no hay directrices específicas descritas para los grupos indígenas de áreas remotas que habitan en territorios comunales nativos (*Tierras Comunitarias de Origen*).

En este artículo, en primer lugar destacaremos aspectos generales de las poblaciones indígenas pertinentes a la pandemia actual del COVID-19, después describiremos nuestra experiencia

específica en un esfuerzo colaborativo para desarrollar e implementar un plan de prevención COVID-19 entre los recolectores-horticultores bolivianos del Departamento de Beni.

## **Poblaciones indígenas: vulnerabilidades y resiliencia**

El exceso de mortalidad por enfermedades infecciosas tiene una larga historia entre las poblaciones indígenas. La viruela, el sarampión y otras enfermedades importadas eliminaron hasta el 80% de las poblaciones nativas en las Américas y el Caribe después del contacto europeo.<sup>6,7</sup> Hasta ahora, COVID-19 ya ha impactado fuertemente a la nación Navajo en los Estados Unidos. Aunque Nuevo México tiene una población 13 veces mayor que la nación Navajo, esta última tiene muchas más muertes que Nuevo México.<sup>8</sup> Al mismo tiempo, al menos siete personas indígenas en la Amazonía brasileña ya dieron positivo<sup>9</sup>, y tres de ellos murieron, incluido un muchacho de 15 años de la tribu de los Yanomani, la tribu semiaislada más grande de Sudamérica. Este caso ilustra el potencial impacto del COVID-19 en las comunidades remotas. El muchacho, quien tenía síntomas gripales, viajó al lejano hospital del estado de Roraima en Brasil en busca de atención médica; sin embargo, su diagnóstico se retrasó. Las complicaciones respiratorias previas, comunes entre los yanomami y otras poblaciones indígenas (ej. Tuberculosis pulmonar, infecciones respiratorias de vías aéreas inferiores)<sup>10</sup>, pueden aumentar el riesgo de muerte por COVID-19. En comparación con este caso, los adolescentes en países industrializados exhiben una mortalidad mínima por COVID-19.<sup>11</sup>

Las poblaciones indígenas experimentan una vulnerabilidad única a COVID-19 por varias razones. Además de las infecciones respiratorias y otras condiciones de salud que aumentan el riesgo de mortalidad por COVID-19, las comunidades indígenas a menudo carecen de acceso a agua limpia, jabón, equipo de protección personal y saneamiento público.<sup>12</sup> Los servicios médicos locales no cuentan con recursos económicos suficientes en muchas comunidades indígenas urbanas, y son escasos o inexistentes en las comunidades indígenas rurales remotas. Los hospitales y las clínicas ya carecen de capacidad para satisfacer la alta demanda de pruebas y tratamiento de COVID-19 en la población general, y mucho menos tienen capacidad para atender a las comunidades indígenas alejadas<sup>13</sup>, y que a menudo ya experimentan estigma o discriminación. Los viajes largos a hospitales o clínicas regionales conllevan un riesgo adicional de transmisión de virus por el transporte público abarrotado u otras rutas de viaje de uso común. La imposibilidad de pagar los servicios médicos dificulta aún más el acceso cuando no están cubiertos por los seguros públicos de salud del gobierno.

Las normas locales también pueden promover la transmisión del virus. La colectividad es un núcleo omnipresente en múltiples aspectos de la vida diaria en muchas culturas indígenas- desde la familia extendida con las que convive, el trabajo comunal y la producción, así como el intercambio de alimentos y otras actividades de grupo. Esta colectividad es clave para la capacidad de recuperación a largo plazo, pero puede obstaculizar el cumplimiento a corto plazo de las medidas de distanciamiento físico, en comparación con otras poblaciones con culturas más individualistas y familias nucleadas.

Muchos grupos indígenas en áreas rurales han desarrollado importantes lazos con mercados y ciudades, especialmente donde los medios de subsistencia tradicionales están desapareciendo. Este acceso al mercado, que a menudo es proporcionado por carreteras o ríos navegables, pueden ser vitales para la seguridad alimentaria, el acceso a medicamentos, los beneficios de seguridad social y otros programas de apoyo económico patrocinados por el gobierno, sin embargo, también pueden facilitar la transmisión rápida del virus desde regiones más densamente pobladas. Además, debido a que varias industrias y negocios que emplean comunidades indígenas cerraron durante la crisis de COVID-19, la inseguridad alimentaria se ha convertido en un serio obstáculo para mantener los medios de vida.<sup>14</sup>

Los ancianos indígenas (muchos de los cuales son líderes en las comunidades) tienen un riesgo particularmente alto de muerte por COVID-19 debido a su edad, algunas comorbilidades (ej. Hipertensión arterial), discapacidad e inmunosenescencia. Los ancianos son vitales para mantener la cultura y el idioma en medio de una rápida globalización, por lo que su pérdida potencial podría resultar en la extinción cultural o lingüística. Estos miembros de la comunidad actúan como

"bibliotecas ambulantes", especialistas en lenguaje, rituales y mitología, son modelos a seguir y son maestros, y también son cuidadores en hogares multigeneracionales.

Por otro lado, debido a que los indígenas a menudo habitan territorios protegidos ricos en biodiversidad y recursos naturales, son blanco de la intensiva extracción de recursos (por ejemplo, explotación forestal y minería) planteando amenazas constantes a los medios de subsistencia y la vida de los indígenas. Por ejemplo, se cree que la minera ilegal es responsable de muchas muertes relacionadas con infecciones desde la década de 1980 entre los yanomami - en el norte de Brasil y Venezuela, incluyendo muertes por infecciones como sarampión y malaria recientes (2019) <sup>15, 16</sup>. Los líderes yanomami ahora alegan que la primera muerte de COVID-19 se debió a la exposición a mineros de oro infectados <sup>9</sup>. La extracción ilegal de recursos también puede aumentar durante la pandemia debido a una menor vigilancia y aplicación de la ley por parte del gobierno, lo que resulta en una explotación aún mayor de los territorios indígenas y en conflictos fatales con las comunidades indígenas comparados con tiempos anteriores a la pandemia. <sup>13</sup>

La historia trágica pasada y la vulnerabilidad actual han aumentado el temor a la devastación masiva por COVID-19 entre las comunidades indígenas de todo el mundo. <sup>13, 14, 17</sup> Teniendo en cuenta las amenazas potenciales y los obstáculos mencionados anteriormente, muchas comunidades indígenas han decidido que la opción más viable es restringir o cerrar sus propias fronteras, con acciones dirigidas principalmente a la prevención de la transmisión viral. Muchos grupos ya han cerrado sus fronteras por su propia decisión, especialmente aquellos grupos acostumbrados al cierre de fronteras durante epidemias anteriores. <sup>14</sup> Por ejemplo, en respuesta a COVID-19, los Waswanipi Cree, del centro de Quebec en Canadá, cerraron el acceso de la comunidad a los no residentes, y exigen una cuarentena de 14 días para cualquier residente que regresa a la comunidad. <sup>17</sup> Los aborígenes de Mapoon de la península del cabo de York en Australia, promulgaron restricciones de viaje autoimpuestas más severas, incluyendo la prohibición de entrada de todos los visitantes y la negación del acceso a los residentes que retornan tras un viaje temporal. <sup>18</sup> Cientos de comunidades indígenas en Brasil, Perú, Colombia y Ecuador han cerrado sus fronteras de manera similar. <sup>19</sup> Esto incluye a los horticultores Shuar de Ecuador. <sup>20</sup> Ecuador y Perú actualmente tiene las tasas de infección per cápita más altas de América Latina. <sup>20</sup> Otras medidas para aislar y proteger a los individuos más vulnerables están siendo activamente propuestas y discutidas. <sup>21</sup>

## **Prevención de la propagación de la pandemia en las tierras bajas de Bolivia, departamento de Beni**

Los Tsimane de Bolivia están distribuidos en más de 100 comunidades, muchas de las cuales se encuentran a lo largo de los ríos Maniqui o Quiquibey, o en las regiones selváticas cercanas. Su tamaño de población es de aproximadamente de 16,000 individuos, con cerca de 4% mayor de 60 años. Los Tsimane producen casi todos sus alimentos (> 90% de calorías en la dieta) <sup>22</sup>, y no tienen acceso a agua corriente o saneamiento. Ellos experimentan una alta carga de infección por diversos patógenos. <sup>23-25</sup> Mucha de su morbilidad y mortalidad se debe a infecciones, particularmente infecciones respiratorias. La tuberculosis pulmonar sigue siendo generalizada y la bronquiectasia es muy común. Su esperanza de vida al nacer era de 40 años hasta finales del siglo 20 <sup>26</sup>. Desde la década de 1970, las carreteras han aumentado el acceso de algunas comunidades a las ciudades, y la mayor disponibilidad de transporte terrestre y acuático motorizado ha facilitado los viajes más frecuentes a las ciudades en la última década, particularmente a San Borja (población alrededor de 45,000 habitantes). Los servicios médicos son limitadas para los Tsimane: existe una clínica dirigida por una misión católica ubicada en las afueras de San Borja que brinda algo de atención médica, así como un hospital en San Borja donde se ofrecen atención básica y cirugías de rutina por parte de médicos generales, por último, hay un par de puestos de salud rudimentarios dispersos en todo el territorio Tsimane. La atención médica por especialistas requiere el transporte a grandes ciudades, incluida la capital de Beni, Trinidad (aproximadamente 6 - 8 horas por carretera desde San Borja). Los Tsimane,

por lo tanto, son una población altamente vulnerable a COVID-19 con opciones limitadas de tratamiento.

El Proyecto de Salud y Ciclo de la Vida Tsimane (THLHP) ha estado trabajando con las comunidades Tsimane desde el año 2002, estudiando la salud y el envejecimiento, al mismo tiempo que proporciona atención primaria en salud y realiza vigilancia epidemiológica de las enfermedades prevalentes.<sup>27, 28</sup> Nosotros ofrecemos una descripción general de nuestra experiencia trabajando con el gobierno, las comunidades Tsimane, y los funcionarios locales y gubernamentales de salud en el municipio de San Borja para ayudar a evitar que el SARS-CoV-2 llegue a las comunidades de Tsimane.

En general, nuestro enfoque en el desarrollo de una estrategia COVID-19 se basa en dos principios. El primero es que las medidas preventivas antes de la ocurrencia de la infección masiva pueden reducir en gran medida la carga de morbilidad y mortalidad. El segundo es que cualquier plan efectivo debe ser un esfuerzo de colaboración entre todas las partes interesadas y debe involucrar a las poblaciones indígenas en el proceso de decisión. Hemos dividido el plan en dos fases: **Fase I**, en la que SARS COV-2 se está extendiendo rápidamente en Bolivia, pero no existen casos confirmados en el Departamento de Beni; y **la Fase II**, la situación actual, cuando la propagación de la pandemia se distribuye en la región en la que viven los Tsimane (Tabla).

**Tabla 1. Elementos esenciales, consideraciones locales y de la implementación en un plan de prevención y contención de Covid-19**

| Fase   | Elementos esenciales                                                             | Implementación                                                                                                                                                       | Consideraciones locales                                                                                                                                                                                          |
|--------|----------------------------------------------------------------------------------|----------------------------------------------------------------------------------------------------------------------------------------------------------------------|------------------------------------------------------------------------------------------------------------------------------------------------------------------------------------------------------------------|
| Fase 1 | <b>Coordinación con los líderes indígenas</b>                                    | Debates sobre planes existentes, evaluación de la percepción local de la enfermedad, asistencia requerida de fuentes no tribales                                     | ¿Existe una comunidad centralizada o muchas comunidades aisladas? ¿Cuáles son las actitudes hacia los forasteros? ¿Cuál es su relación con el gobierno central?                                                  |
|        | <b>Educación / Concientización</b>                                               | Reuniones comunitarias en idioma nativo, volantes, transmisión de mensajes radiales, " Whatsapp " y redes sociales                                                   | Modalidades de comunicación disponibles, conocimiento local sobre Covid-19, comprensión de la transmisión de la enfermedad, idioma (s) hablado (s)                                                               |
|        | <b>Toma de decisiones colectivas</b>                                             | Reuniones comunitarias, consideración del aislamiento colectivo, formación de comités para hacer cumplir las decisiones, documentación de las decisiones colectivas. | Estatus legal del territorio indígena y capacidad de aislamiento colectivo, prácticas culturales sobre la toma de decisiones, la capacidad y los derechos de usar la tierra para producir sus propios alimentos. |
|        | <b>Coordinación con el gobierno regional y las autoridades de salud pública.</b> | Comprensión de las estrategias de gestión existentes de Covid-19, asistencia requerida de fuentes externas, comunicación y aplicación de                             | ¿Existe un plan de contención existente? ¿Existe una política dirigida a las comunidades indígenas?Cuál es el papel potencial de las ONG, estructura del proceso de decisión                                     |

¿Aislamiento colectivo voluntario como una mejor respuesta a COVID-19 para las poblaciones indígenas? Un estudio de caso y protocolo de la Amazonía Boliviana

|                               |                                                                                                                               |                                                                                                                                                                               |                                                                                                                                                       |
|-------------------------------|-------------------------------------------------------------------------------------------------------------------------------|-------------------------------------------------------------------------------------------------------------------------------------------------------------------------------|-------------------------------------------------------------------------------------------------------------------------------------------------------|
|                               |                                                                                                                               | decisiones de aislamiento comunitario                                                                                                                                         |                                                                                                                                                       |
|                               | <b>Compra y capacitación en uso de EPP</b>                                                                                    | Comprender el suministro y la escasez existentes, abastecimiento de suministros, abastecimiento de fondos para la compra, distribución a las comunidades, videos instructivos | ¿Hay reservas locales / nacionales? ¿El EPP está disponible localmente? ¿Están capacitados los trabajadores de la salud en su uso?                    |
|                               | <b>Atención médica en el territorio para enfermedades no COVID-19 para prevenir la exposición en el entorno hospitalario.</b> | Puestos de salud, equipo médico itinerante, asistencia médica.                                                                                                                | Infraestructura médica local, disponibilidad de medicamentos y equipos de diagnóstico, morbilidades comunes y sus síntomas se superponen con Covid-19 |
| <b>Transición: Fase 1 a 2</b> | <b>Soporte de aislamiento</b>                                                                                                 | Cadena de suministro segura de medicamentos, pruebas diagnósticas y necesidades básicas para bloquear las comunidades                                                         | ¿Autonomía territorial, autonomía de subsistencia versus necesidad de mercados, transporte y acceso comunitario, cadenas de suministro en su lugar?   |
| <b>Fase 2</b>                 | <b>Reporte de casos a población indígena</b>                                                                                  | Red de contactos dentro de cada pueblo, grupos de redes sociales, teléfono celular, radio de comunicaciones, apoyo financiero para la comunicación.                           | Disponibilidad de modalidades de comunicación, naturaleza de las interacciones internas y entre comunidades.                                          |
|                               | <b>Informe de casos a las autoridades locales</b>                                                                             | Comunicación con el equipo local de respuesta de Covid para investigar casos sospechosos.                                                                                     | Infraestructura local para la investigación de casos, recursos humanos existentes, confianza entre la población local y las autoridades.              |
|                               | <b>Mapeo de casos sospechosos y confirmados</b>                                                                               | Genere un mapa de casos, hogares / comunidades afectadas, ajuste el plan de contención a los 'puntos calientes' locales                                                       | Disponibilidad de censo e información geográfica, fluidez de comunicación con las comunidades locales.                                                |

## ¿Aislamiento colectivo voluntario como una mejor respuesta a COVID-19 para las poblaciones indígenas? Un estudio de caso y protocolo de la Amazonía Boliviana

|                                            |                                                                                                                                                                                                                           |                                                                                                                                                                    |
|--------------------------------------------|---------------------------------------------------------------------------------------------------------------------------------------------------------------------------------------------------------------------------|--------------------------------------------------------------------------------------------------------------------------------------------------------------------|
| <b>Coordinar respuestas de aislamiento</b> | Comunicación por radio, teléfono y en persona para aislar a las personas afectadas, familias de otras familias y para aislar a las comunidades no afectadas de las comunidades afectadas                                  | Todas las consideraciones anteriores, distribución geográfica de hogares y comunidades, obstáculos para el aislamiento a nivel individual, familiar y comunitario. |
| <b>Pruebas y seguimiento de contactos</b>  | Investigue cada caso, cómo ingresó a la comunidad y pruebe a todas las personas potencialmente afectadas                                                                                                                  | Disponibilidad de pruebas diagnósticas, recursos humanos para la investigación de casos, frecuencia de contactos entre familias y con el mundo exterior.           |
| <b>El manejo del paciente</b>              | Aislamiento de pacientes menos enfermos, medición periódica de oxígeno en sangre de pacientes sintomáticos, soporte de oxígeno de alto flujo, pronación, antivirales y otros tratamientos a medida que estén disponibles. | Todas las consideraciones anteriores, cambiando las mejores prácticas y la disponibilidad de modalidades de tratamiento.                                           |

---

### Fase I: Concientización y Prevención

**Coordinación con los líderes indígenas que representan a las poblaciones indígenas.**

La población Tsimane tiene dos consejos de gobierno, el *Gran Consejo Tsimane* y el *Consejo Regional Tsimane* y *Moseten*. Acuerdos formales de larga data y la buena voluntad entre el THLHP y los mencionados consejos de gobierno para llevar a cabo investigaciones y proporcionar atención primaria de salud a las comunidades Tsimane, ayudan a establecer la confianza y facilitar la colaboración mutua para planificar y ejecutar la respuesta de prevención (Apéndice pag. 3 y 4 en inglés y pag. 9 y 10 en español).

**Provisión de información.** Nuestro equipo incluye 10 indígenas Tsimane, todos bilingües en Tsimane y en español. El primer paso fue educar y entrenar a nuestro equipo y al secretario de salud del Gran Consejo sobre el SARS-CoV-2 (sobre el origen, transmisión, síntomas) y los obstáculos para obtener un tratamiento efectivo. Tres médicos del THLHP y los directores del proyecto trabajaron con los miembros Tsimane del equipo en la traducción y adaptación de los posters informativos del Centro para el Control de Enfermedades de Estados Unidos al idioma Tsimane. <sup>29</sup> Dado que actualmente no hay casos conocidos o sospechosos en la población de Tsimane, y que el transporte fue limitado por el gobierno boliviano, el equipo junto con los miembros del Gran Consejo (todos asintomáticos para COVID-19 o cualquier síntoma similar a la gripe durante al menos dos semanas) viajaron en motocicleta a 60 comunidades para realizar reuniones comunitarias, a partir del 25 de marzo de 2020 (Apéndice p. 2). Esas reuniones tenían dos objetivos: informar a los miembros de la comunidad acerca del COVID-19, y estimular la discusión de posibles respuestas preventivas (Apéndice pag. 5-6 en inglés y pag. 11 y 12 en español). Las presentaciones incluyeron información sobre cómo se propaga el SARS-CoV-2 en todo el mundo, el período de incubación y los riesgos de contagio, la naturaleza a



menudo asintomática del virus, las vulnerabilidades únicas de las personas mayores y las personas con otras condiciones de salud, así como de la falta de una vacuna y la disponibilidad de tratamientos específicos, y el papel de la cuarentena en la prevención de la transmisión del virus. Los retos de ciertas prácticas tradicionales, tales como el intercambio comunal de *shocdye'*, o chicha de yuca fermentada, también se discutió. También hubo una discusión sobre cómo el SARS-CoV-2 podría extenderse a través de la población Tsimane a través de interacciones de comercio y otros encuentros con extraños.

**Toma de decisiones colectiva.** Al igual que la mayoría de otras poblaciones indígenas, los Tsimane tiene experiencia con epidemias locales de enfermedades transmisibles.<sup>26</sup> Los Tsimane en todas las comunidades visitadas reconocieron rápidamente los riesgos de la enfermedad, y sus propias vulnerabilidades. Históricamente, la respuesta Tsimane tradicional a las epidemias fue huir y aislarse en lo profundo de sus territorios, lejos de los extraños. Como se observó en un número creciente de poblaciones indígenas <sup>17-19</sup>, la población de Tsimane llegó a un amplio consenso de que el *aislamiento colectivo* es la estrategia más viable para minimizar la exposición a COVID-19 hasta que las vacunas o los tratamientos estén disponibles.

Se realizaron discusiones activas durante las reuniones de la comunidad centradas en cómo lograr de mejor manera el aislamiento colectivo. Un elemento importante era impedir la entrada de los *Napo* (es decir, extraños no Tsimane) en el territorio y en las comunidades Tsimane. Las comunidades organizaron grupos de voluntarios para construir trancas y protegerlas. Otro elemento importante era regular las interacciones de los comunarios con los no residentes. La mayoría de las reuniones dieron como resultado un consenso a nivel de comunidad de que nadie debería abandonar el territorio e ir a un área con riesgo de enfermedad a menos que hubiera una emergencia. También hubo acuerdo sobre la necesidad de una cuarentena de 14 días en varios puntos clave de entrada al territorio Tsimane para cualquier comunario que se saliera o regresara a la comunidad. La noción de cuarentena se consideró similar a varias prácticas tradicionales, como el aislamiento y la protección posparto de las madres y de sus recién nacidos. Buena parte del debate se centró en la necesidad de poner en cuarentena a los individuos que presentan síntomas y, en particular, la construcción de cabañas con materiales locales para cuartos de cuarentena. También hubo mucha discusión sobre cómo proteger a los ancianos, especialmente a aquellos con discapacidades. En la mayoría de las comunidades, las discusiones concluyeron con un acta de reunión formal que los asistentes firmaron o imprimieron sus huellas digitales, para formalizar los convenios colectivos realizados durante la reunión. Estas actas constituyen una prueba formal para presentar a las autoridades gubernamentales acerca de los procesos de decisión colectiva.

Las reuniones de las comunidades también resultaron en solicitudes de ayuda de parte de los miembros de la comunidad para lograr el aislamiento colectivo. Estos incluyeron: 1) dotación de sal para complementar los alimentos que los Tsimane producen localmente y jabón para la higiene de manos para eliminar virus de manos; 2) suficientes medicamentos para las dolencias comunes, de manera que los Tsimane puede evitar dejar su territorio para buscar atención médica; 3) suministros para los ambientes de cuarentena (por ejemplo mosquiteros y utensilios para comer), y 4) apoyo para armar las trancas (por ejemplo, cerraduras y cadenas) y asegurar las barricadas físicas que se crearon recientemente para lograr el aislamiento de la comunidad.

Las decisiones de estas reuniones formaron la base del plan de prevención para todas las aldeas.

**Coordinación con el gobierno regional y las autoridades de salud pública.** Un elemento crítico de la Fase I ha sido la coordinación con las autoridades locales, el hospital local y la red de respuesta al COVID-19, el gobernador del Beni y los Tsimane representantes en la Asamblea Nacional, así como con los policías y militares que hacen cumplir la cuarentena ordenada por el gobierno nacional (por ejemplo, la prohibición de viajes interprovinciales). Esto permitió a nuestro equipo conseguir permisos aprobados por el gobierno para viajar rápidamente a las comunidades Tsimane para celebrar reuniones, y para transportar a los médicos, medicamentos y equipo de protección personal (PPE) al

territorio Tsimane desde La Paz y Santa Cruz. Las actas de reuniones comunitarias firmadas se compartieron con las autoridades en la búsqueda de asistencia alimentaria y la aplicación del aislamiento colectivo.

El gobierno regional de Beni ha donado algunos suministros de alimentos directamente a las comunidades Tsimane. Nuestro equipo está coordinando con la oficina del Gobernador del Beni para incluir nuestra compra de jabón y sal en la distribución de comida para cada comunidad, conforme a lo solicitado en las reuniones de la comunidad. También estamos equipando con mosquiteros y utensilios para comer a cada comunidad que construye viviendas de cuarentena según lo solicitado por los comunarios, además de candados y cadenas en caso necesario.

**Compra de equipos de protección personal (EPP) para la distribución local.** Como en gran parte del mundo, hay escasez de EPP en Bolivia. Estamos actualmente comprando máscaras N95, gafas y guantes para donar al hospital local de San Borja, a los profesionales de salud, y al personal del THLHP. También se donarán máscaras y guantes quirúrgicos a cada comunidad según sea necesario. La escasez inevitable puede requerir las mejores prácticas para la reutilización segura del EPP. También se proporcionará capacitación sobre el uso apropiado de EPP según las pautas de la OMS.

**Prestación de atención médica para pacientes no COVID -19 dentro del territorio Tsimane.** Una de las necesidades más apremiantes para lograr el aislamiento colectivo es la provisión de atención médica para las personas con enfermedades distintas de COVID-19. Debido a la naturaleza de su entorno y la escasa infraestructura de salud pública, los Tsimane padecen innumerables enfermedades infecciosas, incluidos parásitos intestinales, enfermedades diarreicas y enfermedades respiratorias. Dichas infecciones a menudo requieren que la gente busque tratamiento médico en el hospital de San Borja y viaje para comprar los medicamentos en las farmacias de San Borja. En la medida de lo posible, nuestro objetivo es que la mayor parte de la atención médica se brinde en las cinco postas de salud atendidas por un médico de atención primaria en un esfuerzo de colaboración entre nuestro equipo y los médicos pagados por el gobierno, para que los comunarios no tengan que abandonar el territorio y correr el riesgo de infectarse en la ciudad. También hemos adquirido medicamentos anticipadamente para la fase II, para cuando viajar hacia y desde el territorio probablemente significará mayor riesgo de infección por SARS-Cov-2 o será imposible debido a las inclemencias del tiempo.

**Resumen de la Fase I.** Antes de participar en la Fase I, la mayoría de los Tsimane tenían poco conocimiento sobre el riesgo de COVID-19. Ahora, participan activamente en la planificación para prevenir y contener su propagación en las comunidades. Esperamos que estos primeros pasos ayuden a prepararse para la fase II, que será mucho más desafiante.

## **Fase II: Contención de COVID-19 y manejo del paciente**

La fase II comenzó cuando los primeros casos de COVID-19 fueron diagnosticados y confirmados en el Beni, donde viven los Tsimane (20 de Abril del 2020) al momento de escribir este artículo no se han encontrado casos confirmados en San Borja, el municipio más cercano a las comunidades Tsimane. Dado el riesgo de propagar COVID-19 a través de los viajes, durante la Fase II nuestro equipo dejará de visitar las aldeas Tsimane. En lugar de eso, utilizaremos nuestra oficina en San Borja como base de operaciones para la respuesta. Desde esta base, el personal de THLHP realizará el rastreo de contactos en comunidades con casos sospechosos y confirmados de COVID-19, utilizando la estación de radio Tsimane (capaz de llegar a la mayoría de las comunidades Tsimane) y otros modos de comunicación (por ejemplo, radio de onda corta, teléfono celular). Además, los pacientes de cualquier comunidad pueden visitar nuestra oficina para ayudar a coordinar el tratamiento de problemas médicos que no sean COVID-19. Nuestro equipo seguirá proporcionando

información actualizada, y también coordinará la ayuda del gobierno local y la respuesta de salud pública en el territorio Tsimane.

**Informe de casos a la población de Tsimane.** A través de la estación de radio Tsimane, proporcionaremos mensajes radiales diarios con actualizaciones sobre casos confirmados y sospechosos de COVID-19 en cada comunidad. Hemos comenzado proporcionando informes sobre nuevos casos y muertes dentro de Bolivia. Una vez que el COVID-19 sea detectado en el territorio Tsimane, las sesiones informativas serán más detalladas e incluirán sugerencias para las respuestas estratégicas. Además de la estación de radio Tsimane, nuestra oficina en San Borja se comunicará directamente con las comunidades Tsimane distantes a través de un equipo de radio de comunicaciones, y con las comunidades cercanas por teléfono celular.

**Informe de casos a las autoridades locales.** Los indígenas Tsimane podrán contactarse con el personal de nuestra oficina para reportar casos sospechosos en sus comunidades. Los miembros del equipo que hablan Tsimane estarán disponibles para recibir información sobre los casos sospechosos de las comunidades ya sea por teléfono o por radio de comunicaciones. Esos casos, que pueden no ser conocidos por las autoridades de salud locales debido a su lejanía, serán reportados a las autoridades de la red de respuesta COVID-19 de Bolivia para su investigación, posibles pruebas y tratamiento.

**Vincular casos sospechosos y confirmados de COVID-19 con el sistema de información geográfica (SIG) o base de datos del censo.** El THLHP ha recopilado un censo de los hogares y datos de posicionamiento global para la mayoría de los hogares en las cerca de 100 comunidades Tsimane. Vincularemos los informes sobre casos confirmados y sospechosos de COVID-19 a estos datos SIG para rastrear la propagación del virus y los posibles centros de infección. Esta información se utilizará para coordinar las respuestas de aislamiento entre las comunidades afectadas y no afectadas, teniendo cuidado de no estigmatizar a las personas o familias afectadas por COVID-19; la estigmatización obstaculizó los esfuerzos de control del Ebola en el África Subsahariana <sup>30, 31</sup>, así como el tratamiento del VIH en los Estados Unidos. <sup>31</sup> Para reducir la estigmatización de los casos sospechosos o confirmados de COVID-19, enfatizaremos la inclusión y la solidaridad con los casos de COVID-19 en mensajes de radio y otros tipos de comunicaciones. Estos mensajes enfatizan que cualquier persona es capaz de infectarse, y que una vez que un individuo se ha recuperado y ha estado libre de síntomas durante dos semanas, el riesgo de contagio es muy bajo. También, enviamos el mensaje que solo con la unidad de los comunarios, la comunidad puede estar protegida. Mensajes similares de parte de los líderes de la comunidad reforzaran y legitimaran aún más estas ideas.

**Coordinar las respuestas de aislamiento dentro de las comunidades afectadas y no afectadas.** Utilizando datos de SIG y haciendo un seguimiento de casos sospechosos utilizaremos todas las modalidades de comunicación para ayudar a las comunidades a responder a la propagación del SARS-CoV-2.

La sospecha o confirmación de casos de COVID-19 en una comunidad iniciará las medidas de distanciamiento físico y de aislamiento a nivel individual y de familia. Dado que muchas familias Tsimane tienen parcelas distantes y pueden construir eficientemente casas rudimentarias con materiales de la selva, es posible que cada familia abandone el pueblo y se aisle a sí misma de otras familias. Para las familias que carecen de casos sospechosos o confirmados, este autoaislamiento puede ser la respuesta preferida a las infecciones en o cerca de grupos de familias. Durante las reuniones de la fase I sugerimos que las familias se preparen para tal aislamiento, particularmente si las familias tienen integrantes ancianos, así como estrategias para el cuidado y aislamiento de los casos de COVID-19. Apoyaremos a esas familias con consejos detallados y materiales impresos y radiales que sean cultural y lingüísticamente específicos sobre cómo usar el EPP y poner en cuarentena con éxito a los miembros de la familia que presenten síntomas. <sup>29</sup>

## ¿Aislamiento colectivo voluntario como una mejor respuesta a COVID-19 para las poblaciones indígenas? Un estudio de caso y protocolo de la Amazonía Boliviana

Para aldeas sin casos sospechosos o confirmados, será importante restringir las visitas desde y hacia otros pueblos. También se aconsejará a esos pueblos que se preparen para el aislamiento a nivel familiar en sus otras casas ubicadas en sus parcelas.

**Pruebas y seguimiento de contactos.** Un sistema de diagnóstico rápido local de casos sospechosos de COVID-19 es una herramienta clave en la contención de la propagación de la infección. Estamos buscando activamente pruebas moleculares que puedan implementarse en los puntos de atención médica para ayudar a confirmar los diagnósticos. En el contexto del aislamiento colectivo, en el que la mayoría de los comunarios no abandonan sus comunidades, el rastreo de contactos y las pruebas a los miembros del hogar son viables. Un esfuerzo coordinado entre nuestro equipo y los trabajadores de salud del gobierno encargados del diagnóstico, el procesamiento adecuado de la muestra a nivel local, nuestro censo actualizado, y los traductores Tsimane como buscadores de contactos de casos (que se encuentra tanto en nuestra base y dentro de las comunidades, para evitar los viajes entre la ciudad y las comunidades), permitirá contener los brotes de la enfermedad antes de que se diseminen a otras comunidades. El desarrollo de este plan aún está en proceso.

**Manejo de pacientes.** A diferencia de muchas otras enfermedades infecciosas, el tratamiento antiviral basado en evidencia para el SARS- COVID-2 todavía está bajo investigación en todo el mundo. Las medidas de apoyo efectivas incluyen oxígeno suplementario, hidratación y la capacidad de intubar y ventilar mecánicamente cuando es necesario. Puede ser necesario el uso de tratamiento antibiótico en casos de posible sobreinfección bacteriana. Con una tasa de mortalidad del 50-80% de los pacientes intubados en los países industrializados <sup>2</sup>, la intubación probablemente será inútil en este contexto sin cuidados médicos especializados. Los riesgos de hospitalización incluyen la exposición a otros pacientes con COVID-19 y personal hospitalario potencialmente infectado al paciente Tsimane entrante y a sus familiares que le acompañan, además conlleva el riesgo potencial de llevar el virus a sus comunidades a su retorno. En este momento, para todos los pacientes, excepto los más gravemente sintomáticos, las desventajas de ser hospitalizado para el paciente y la comunidad probablemente superan los beneficios.

Como estrategia principal para manejar los casos de COVID-19 con una saturación de oxígeno inadecuada (evaluada utilizando oxímetros de pulso disponibles), el oxígeno suplementario tiene el potencial de ser administrado fuera del hospital en los cinco puestos de salud mencionados anteriormente. El suministro de oxígeno durante veinticuatro horas puede ser provisto por cánulas nasales con reservorios de oxígeno. Esto permitiría proporcionar un tratamiento efectivo, sin la intubación, cercano a la comunidad del paciente y en un espacio mucho menos congestionado comparado con un entorno hospitalario. Para los pacientes que no requieren oxígeno, se puede realizar su aislamiento en la comunidad. Las conversaciones sobre estrategias de tratamiento requerirán la participación directa de líderes comunitarios y miembros de la familia para reducir las posibilidades de que los pacientes rechacen el tratamiento. Para cualquier rechazo, el aislamiento será crítico, combinado con alivio de los síntomas con analgésicos y monitoreo de hipoxia.

En el futuro, si se descubre tratamientos para COVID-19, como antivirales e inmunomoduladores intravenosos, que sean efectivos y estén disponibles en el área, el tratamiento regional de pacientes hospitalizados puede ayudar a prevenir la progresión de la enfermedad y mitigar la mortalidad.

### **Una estrategia de prevención rápida para otras poblaciones indígenas.**

Los riesgos, desafíos y opciones para las respuestas estratégicas que enfrentan las comunidades indígenas comparten muchas características con las que enfrentan las poblaciones de todo el mundo, debido a las características del propio COVID-19. Sin embargo, existen algunas

circunstancias comunes entre muchos pueblos indígenas que presentan diferentes riesgos y oportunidades.

Con respecto al riesgo, es probable que las áreas urbanas afectadas en todo el mundo agoten los suministros médicos, las instalaciones de laboratorio y las camas de hospital, dejando poco para las poblaciones indígenas. Situaciones similares para las minorías y la pobreza de recursos pueden empeorar las disparidades de salud <sup>33</sup>. Al mismo tiempo, se pueden aprovechar fuentes únicas de resiliencia para prevenir la mortalidad generalizada en las comunidades indígenas. La capacidad de producir diariamente alimentos de subsistencia es vital para el aislamiento colectivo. Por lo tanto, los derechos sobre la tierra y el uso por parte de las comunidades indígenas son fundamentales para garantizar sus actividades de subsistencia. La soberanía tribal reconocida por el gobierno también es una ventaja para muchas poblaciones indígenas. Esto puede facilitar la toma de decisiones comunitarias que pueden hacer cumplir las autoridades gubernamentales y tribales, incluida la restricción de los movimientos dentro y fuera del territorio. Las normas culturales basadas en fuertes lazos familiares y reuniones comunitarias, como los que hemos llevado a cabo, son el contexto para la toma de decisiones colectivas. Por último, la baja densidad de población facilita tanto el aislamiento como el rastreo de contactos. Estas fuentes de resistencia se pueden aplicar al desarrollo de estrategias para la prevención y mitigación de la mortalidad por COVID-19 en las poblaciones indígenas.

La tabla proporciona un marco general para los elementos esenciales, implementación de estrategias y consideraciones del contexto local para los planes de prevención y contención en otras poblaciones indígenas. Idealmente, las fases I y II ocurren secuencialmente, pero es posible que sea necesario realizarlas simultáneamente si COVID-19 ya está localmente presente. Así mismo, los detalles deberán adaptarse a las circunstancias locales en muchos otros entornos indígenas.

La evaluación de los conocimientos y educación locales sobre COVID-19 son fundamentales. Otro elemento fundamental es la promoción y el respeto de la toma de decisiones activa colectiva por la propia comunidad, que incluye todas las partes interesadas, incluidos los líderes comunitarios y miembros, gobierno local y autoridades de salud pública, y cualquier otra entidad que participa en la gestión de la respuesta a la pandemia. Si las comunidades deciden aislarse colectivamente, puede ser necesario el apoyo económico, médico y logístico para hacer posible el aislamiento. La adquisición y capacitación en el uso de EPP es otro elemento esencial, así como lo es tener un plan para el tratamiento de enfermedades crónicas o agudas que no sean COVID -19 que garantice que se traten los casos emergentes, mientras se mantiene el plan de aislamiento.

Para la Fase II, se deben implementar estrategias de comunicación para informar a las personas sobre dónde se encuentran los casos sospechosos y / o confirmados, sin crear un estigma que evite que las personas busquen atención médica <sup>31</sup> (Apéndice 7-8 en inglés y 13-14 en inglés). Debería haber estrategias para prevenir la propagación del virus a áreas y familias no afectadas. El distanciamiento físico se puede aplicar tanto a nivel de la comunidad, el hogar y el individuo mientras cambian las circunstancias, y adaptarlas a contextos rurales y culturales específicos. Las fuentes externas pueden proporcionar asistencia con el suministro de EPP al personal de salud local; así como para ayudar en la cuarentena y el aislamiento de los pacientes. Las pruebas y el rastreo de contactos facilitarán en gran medida la contención de casos, a medida que estén disponibles pruebas confiables y portátiles. Si el soporte de oxígeno sigue siendo el tratamiento más efectivo, este puede ser proporcionado por estrategias innovadoras en las postas de salud locales como se describió anteriormente. Se podría proporcionar apoyo de telemedicina de especialistas locales o extranjeros para ayudar al personal de salud local, en particular a medida que se conozca más sobre las posibles terapias y las mejores prácticas de apoyo al paciente a medida que COVID-19 se propaga a nivel mundial. Si las terapias intravenosas resultan eficaces, como los agentes antivirales y / o inmunomoduladores, las oportunidades de hospitalización serán importantes.

Otros aspectos de la Fase II también pueden tener que adaptarse a las condiciones locales. El alcance en el que una población indígena depende de los bienes comprados en los mercados puede

requerir cambios en el plan de aislamiento. Una posible solución para las comunidades indígenas que dependen del mercado es instituir *mercados controlados* cerca de las aldeas, pero fuera de ellas, para evitar visitas a las ciudades o para evitar que comerciantes externos entren a las comunidades. Este proceso se está aplicando actualmente entre los Moseten, un grupo indígena más aculturados que son cultural y lingüísticamente similar a la Tsimane. Esto implica hacer arreglos con comerciantes de confianza con respecto a aquellos bienes que los comunarios desean vender y comprar, y acerca de los controles que se ponen en marcha. En días determinados, las mercancías podrían ser transportados a la zona designada con vendedores y compradores que mantienen el distanciamiento físico y el uso de EPP.

## **Conclusión: Actuar ahora para prevenir desastres**

Nuestro objetivo para esta contribución es promover estrategias generales y adaptables para mitigar los efectos de la pandemia del COVID-19 en las poblaciones indígenas. Nosotros asumimos que hay muchos pueblos indígenas que no se han beneficiado de preparación en avance para la pandemia, y cuyas necesidades pueden ser excluidas de los planes regionales debido a la falta de recursos, apoyo logístico y cultural. Alentamos una discusión más amplia e inmediata de las estrategias de mitigación entre múltiples partes interesadas. Sitios web como COVID-19 de las Naciones Unidas y los pueblos indígenas,<sup>34</sup> podrían actuar como un centro de información relevante y de actualización de información sobre los planes de acción en todo el mundo. El momento de actuar es ahora, antes de que COVID-19 produzca una devastación en las poblaciones indígenas.

## **Colaboradores**

DER, JCA, RQG, MGC, RMM y LMM fueron fundamentales para organizar e implementar el plan COVID-19 en el territorio de Tsimane. HSK y MDG concibieron la idea del artículo. HSK, BCT, JS, GST, DEM, DER y MGD redactaron el documento. Todos los autores aportaron ideas, comentarios y revisaron el documento. Todos los autores aprobaron la versión final.

**Declaración de intereses.** Todos los autores declaran no tener intereses en competencia.

**Agradecimientos.** THLHP está financiado por National Institute of Health / National Institute of Aging (RF1AG054442) y por National Science Foundation (1748282). JS también reconoce la financiación IAST de la Agencia Nacional de Investigación (ANR) de Francia en el marco del programa Inversiones para el Futuro (Investissements d’Avenir) (ANR-17-EURE-0010). Los financiadores no influyeron en ningún aspecto de nuestro plan COVID-19 ni en la decisión de presentar. Agradecemos al equipo THLHP por sus incansables esfuerzos de prevención, especialmente Arnulfo Cari Ista, Bernabe Nate Añez, Bacilio Vie Tayo, Jesus Bani Cuata, Erwin Gutiérrez Cayuba, Alberto Vie Tayo, Cristian Alameda Claros, Lorgio Canchi Tayo, Marcos Renard Vasquez y Genaro Roca Moya. También agradecemos al equipo de estudio de Horus por su ayuda en el desarrollo del protocolo.

## Referencias

1. The World Bank. Indigenous peoples. <https://www.worldbank.org/en/topic/indigenouspeoples>. 2020 (accessed April 20, 2020).
2. Worldometer. <https://www.worldometers.info/coronavirus/countries-where-coronavirus-has-spread/>. (accessed April 30, 2020).
3. Gracey M, King M. Indigenous health part 1: determinants and disease patterns. *The Lancet* 2009; **374**(9683): 65-75.
4. La Ruche G, Tarantola A, Barboza P, Vaillant L, Gueguen J, Gastellu-Etchegorry M. The 2009 pandemic H1N1 influenza and indigenous populations of the Americas and the Pacific. *Eurosurveillance* 2009; **14**(42): 19366.
5. Lombardo U, Iriarte J, Hilbert L, Ruiz-Pérez J, Capriles JM, Veit H. Early Holocene crop cultivation and landscape modification in Amazonia. *Nature* 2020: 1-4.
6. Cook ND. Born to die: disease and New World conquest, 1492-1650: Cambridge University Press; 1998.
7. Mann CC. 1491: New revelations of the Americas before Columbus: Alfred a Knopf Incorporated; 2005.
8. Romero S. Checkpoints, curfews, airlifts: virus rips through Navajo nation. *New York Times*. 2020 April 10, 2020.
9. Phillips T. Covid-19 fears grow for indigenous South Americans as Yanomami teen tests positive. *Guardian*. 2020 April 8, 2020.
10. Sousa AO, Salem JI, Lee FK, et al. An epidemic of tuberculosis with a high rate of tuberculin anergy among a population previously unexposed to tuberculosis, the Yanomami Indians of the Brazilian Amazon. *Proceedings of the National Academy of Sciences* 1997; **94**(24): 13227-32.
11. Team CC-R. Severe Outcomes Among Patients with Coronavirus Disease 2019 (COVID-19) — United States, February 12–March 16, 2020, 2020.
12. Ferrante L, Fearnside PM. Protect Indigenous peoples from COVID-19. *Science* 2020; **368**(6488): 251.
13. Soares J. Brazil: Indigenous people in the Amazon brace for coronavirus. *dwcom*. 2020 April 6, 2020.
14. Wight A. Coronavirus 'could devastate' indigenous communities. *SciDevNet*. 2020 April 1, 2020.
15. Smith R. Measles outbreak threatens isolated Amazonian tribe. *CNN*. 2018 July 5, 2018.
16. Fraser B. Measles outbreak in the Americas. *The Lancet* 2018; **392**(10145): 373.
17. Coletta A, Traiano H. The world's indigenous peoples, with tragic history of disease, implore outsiders to keep coronavirus away. *Washington Post*. 2020 March 31, 2020.
18. Mounter B. Self-imposed coronavirus lockdown part of Cape York efforts to protect vulnerable communities. *ABC Far North*. 2020 March 23, 2020.
19. Collyns D, Cowie S, Parkin Daniels J, Phillips T. 'Coronavirus could wipe us out': indigenous South Americans blockade villages. *Guardian*. 2020 March 30, 2020.
20. León Cabrera JM, Kurmanaev A. Ecuador Gives Glimpse Into Pandemic's Impact on Latin America. *New York Times*. 2020 April 8, 2020.
21. Allam L. Indigenous elders ask to be evacuated from remote communities over coronavirus fears. *Guardian*. 2020 April 3, 2020.
22. Kraft TS, Stieglitz J, Trumble BC, Martin M, Kaplan H, Gurven M. Nutrition transition in 2 lowland Bolivian subsistence populations. *The American journal of clinical nutrition* 2018; **108**(6): 1183-95.
23. Blackwell AD, Trumble BC, Maldonado Suarez I, et al. Immune Function in Amazonian Horticulturalists. *Annals of Human Biology* 2016; **43**(4): 382-96.

¿Aislamiento colectivo voluntario como una mejor respuesta a COVID-19 para las poblaciones indígenas? Un estudio de caso y protocolo de la Amazonía Boliviana

24. Vasunilashorn S, Finch CE, Crimmins EM, et al. Inflammatory gene variants in the Tsimane, an indigenous Bolivian population with a high infectious load. *Biodemography and Social Biology* 2011; **57**(1): 33-52.
25. Dinkel KA, Costa ME, Kraft TS, et al. Relationship of sanitation, water boiling, and mosquito nets to health biomarkers in a rural subsistence population. *American Journal of Human Biology* 2020: e23356.
26. Gurven M, Kaplan H, Supa AZ. Mortality experience of Tsimane Amerindians of Bolivia: Regional variation and temporal trends. *American Journal of Human Biology* 2007; **19**(3): 376-98.
27. Gurven M, Stieglitz J, Trumble B, et al. The Tsimane Health and Life History Project: Integrating anthropology and biomedicine. *Evolutionary Anthropology: Issues, News, and Reviews* 2017; **26**(2): 54-73.
28. Kaplan H, Thompson RC, Trumble BC, et al. Coronary atherosclerosis in indigenous South American Tsimane: a cross-sectional cohort study. *Lancet* 2017; **389**(10080): 1730-9.
29. Center for Diseases Control and Prevention. Coronavirus Disease 2019 (COVID-19) Print Resources. 2020. <https://www.cdc.gov/coronavirus/2019-ncov/communication/print-resources.html>.
30. Barry SH, Richard PA. Cultural Contexts of Ebola in Northern Uganda. *Emerging Infectious Disease journal* 2003; **9**(10): 1242.
31. Reluga TC, Smith RA, Hughes DP. Dynamic and game theory of infectious disease stigmas. *Journal of Theoretical Biology* 2019; **476**: 95-107.
32. Yang X, Yu Y, Xu J, et al. Clinical course and outcomes of critically ill patients with SARS-CoV-2 pneumonia in Wuhan, China: a single-centered, retrospective, observational study. *The Lancet Respiratory Medicine* 2020.
33. Board NTE. How to Save Black and Hispanic Lives in a Pandemic. New York Times. 2020 April 11, 2020.
34. NACIONES UNIDAS. COVID-19 y pueblos indígenas. <https://www.un.org/development/desa/indigenouspeoples/covid-19.html> (consultado el 30 de abril de 2020).



## APÉNDICE SUPLEMENTARIO

### CONTENIDO

**1. Figura S1** (a, b) Reuniones con los Tsimanes durante Fase 1; (c) Un bloqueo para prevenir extranjeros de entrar a las comunidades Tsimanes; (d) Entrega de sal y jabón para ayudar con el aislamiento de los enfermos con sospecha de COVID-19. Crédito: THLHP.

### 2. Detalles de Protocolo

2.1. Estructura organizacional de colaboración local para la prevención de COVID-19 en las comunidades Tsimanes (Español).

2.2. Ejemplo de guión para una reunión comunal en una comunidad Tsimane durante Fase 1 (Español).

2.3. Ejemplo de guiones para mensajes por radio durante Fase 1 (Español).

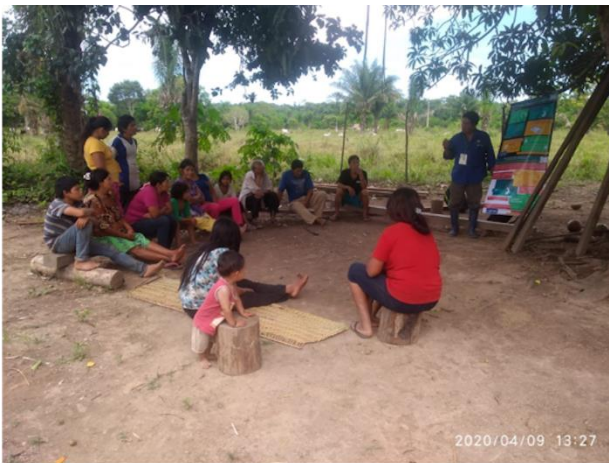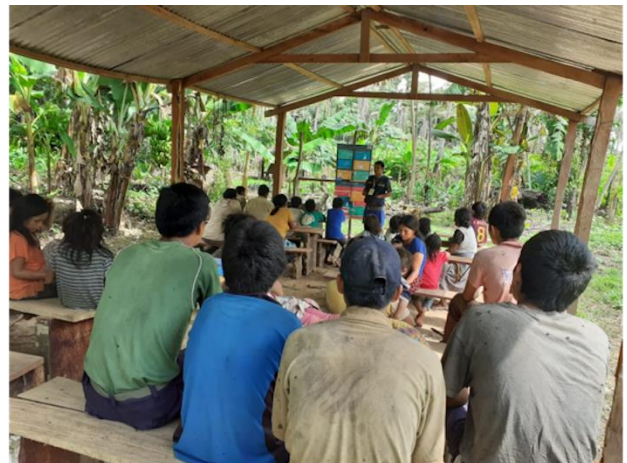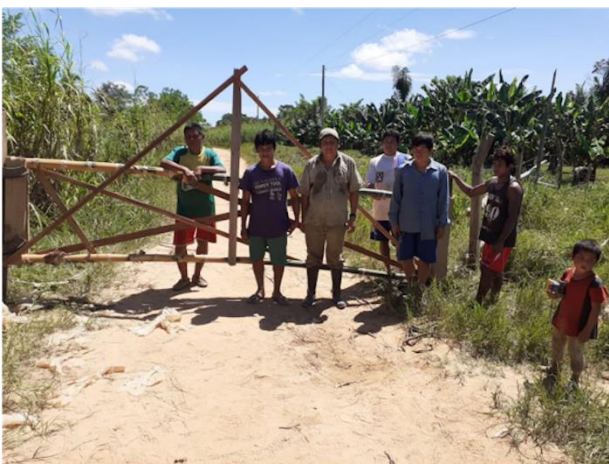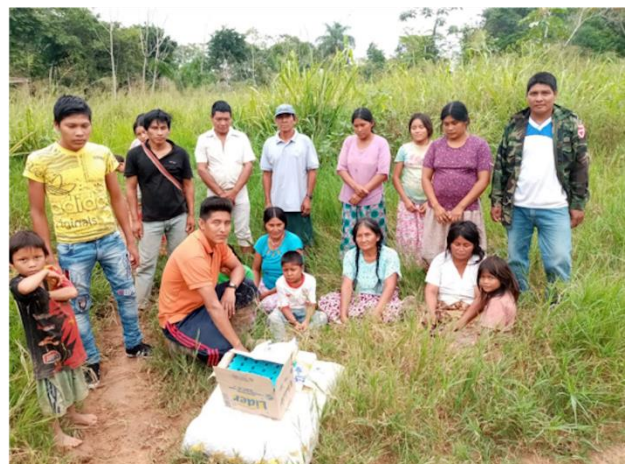

¿Aislamiento colectivo voluntario como una mejor respuesta a COVID-19 para las poblaciones indígenas? Un estudio de caso y protocolo de la Amazonía Boliviana

**Figura S1** (a, b) Reuniones con los Tsimanes durante Fase 1; (c) Un bloqueo para prevenir extranjeros de entrar a las comunidades Tsimanes; (d) Entrega de sal y jabón para ayudar con el aislamiento de los enfermos con sospecha de COVID-19. Crédito: THLHP.

## **Appendix 2.1. Estructura organizacional de colaboración local para la prevención de COVID-19 en las comunidades Tsimanes.**

### **INSTRUCTIVO DE ESTRUCTURACIÓN Y FUNCIONES DEL COMITÉ DE VIGILANCIA LOCAL TSIMANE PARA LA EPIDEMIA DE CORONAVIRUS**

#### **ALIADOS DEL PLAN DE VIGILANCIA DE CONTROL DE CORONAVIRUS EN ETNIA TSIMANE**

##### **COMUNIDADES**

GRAN CONCEJO TSIMANE representado por el Sr Maguin Gutierrez  
PROYECTO SALUD Y ANTROPOLOGIA TSIMANE representado por el Prof. Hillard Kaplan,  
Michael Gurven, Jonathan Stieglitz, y Ben Trumble  
ESTACION BIOLOGICA DEL BENI representado por la Sra. Carola Vaca  
FUNDACION SOLIDARIDAD MEDICA CANARIA a nombre del responsable Dr. Sergio Bejarano

##### **CONFORMACIÓN DEL EQUIPO DE VIGILANCIA**

Quienes forman parte del comité de vigilancia

- a) Corregidor
- b) Representante de ancianos
- c) Representante de mujeres
- d) Representante de Proyecto Antropología
- e) Representante del Gran Concejo Tsimane

##### **FUNCIONES DEL COMITÉ DE VIGILANCIA**

- a) Implementar normas internas de la comunidad para manejo de casos sospechosos
- b) Dirigir la construcción de ambientes de cuarentena para contactos probables y casos sospechosos
- c) Definir las condiciones de contacto con caso sospechoso y contactos probables
- d) Coordinar con centros de salud y con equipo de epidemiología del proyecto Tsimane para reporte de casos y contactos.
- e) Reuniones con la comunidad para dar informes y coordinar actividades durante la epidemia

##### **DEFINICIONES OPERATIVAS**

###### **Definición de caso sospechoso**

Una vez que se haya iniciado la epidemia, se considerara como caso sospechoso a toda persona que presente tos y fiebre con o sin problemas para respirar y que este viniendo de una zona que ya se haya notificado casos confirmados de COVID 19.

###### **Definición de probables contactos**

## ¿Aislamiento colectivo voluntario como una mejor respuesta a COVID-19 para las poblaciones indígenas? Un estudio de caso y protocolo de la Amazonía Boliviana

Cualquier persona que provenga de una zona de epidemia de COVID 19 activa

### **CUARENTENA**

#### **Quienes entraran a la cuarentena?**

Los individuos que cumplan con la definición de caso sospechoso y contacto probable

#### **En que consistirá la cuarentena?**

La cuarentena consistirá en la separación de los casos sospechosos y los contactos probables del resto de la comunidad. Para esto se les brindará un ambiente para alojarse además de darles de plato, cuchara y vaso para que sus familiares les hagan llegar sus alimentos mientras se encuentra separado. También se le dará detergente para que laven sus manos, ropa y utensilios de cocina.

#### **Tiempo de duración de la cuarentena**

Los posibles contactos deben estar en cuarentena para su observación durante 12 días para ver si presentan síntomas, de no presentar síntomas pueden integrarse a su familia y comunidad.

Los casos sospechosos deben asistir a la atención médica (Centro de salud más cercano) y deben estar separados en la cuarentena hasta que remitan sus síntomas. Se les proveerá la alimentación y la medicación necesaria durante su enfermedad, así como evaluaciones diarias para ver la progresión de la enfermedad y la necesidad de transferencia a centros de salud más especializados.

### **INSUMOS PARA CADA COMITÉ DE VIGILANCIA**

- a) Comprar detergente, plato, cuchara y vaso para los comités para que usen los contactos cuando interactúen con los casos sospechosos.
- b) Botiquín para IRAS de comunidad
- c) Coordinar con centros de salud para evitar que los pacientes con enfermedades tratables en primer nivel vayan a SB

## **Appendix 2.2** Ejemplo de guión para una reunión comunal en una comunidad Tsimane durante Fase 1.

### **Introducción:**

Estamos en una situación especial, ya que tenemos una enfermedad llamada COVID 19(nCoV 19) , enfermedad que empezó en China en diciembre del 2019 y se fue diseminando por varios países y continentes, actualmente esta enfermedad está matando entre 500 a 800 personas por día en Países como España, Italia. El último dato que tenemos es que hasta el día de Hoy murieron en todo el mundo más de 15.000 personas; pero lo más importante que debemos mencionar es que la enfermedad ya está en Bolivia, tenemos 27 casos, motivo por el cual damos esta charla.

### **Que es la enfermedad por coronavirus 2019 (COVID 19)?**

Es una enfermedad respiratoria que se puede contagiosa similar a un resfrio, provocado por un virus llamado nuevo coronavirus 2019; Actualmente no existe una vacuna ni medicamento para prevenir o curar la enfermedad por coronavirus 2019 (COVID-19).

Hay más riesgo en personas mayores de 50 años, personas con enfermedad de base diabetes, Hipertensión, enfermedad renal, enfermedad cardiaca, inmunodeprimidos y hay estudios que refieren que es un riesgo muy alto el hecho de estar con anemia, desnutrición y carecer de servicios básicos.

### **¿Cómo se propaga el COVID-19?**

Es probable que el virus haya iniciado en una fuente animal, pero ahora se está propagando de persona a persona. Se cree que el virus se propaga principalmente entre las personas que están en contacto cercano unas con otras (dentro 1metro de distancia), a través de las gotitas respiratorias que se producen cuando una persona infectada tose o estornuda. También podría ser posible que una persona contraiga el COVID-19 al tocar una superficie u objeto que tenga el virus y luego se toque la boca, la nariz o posiblemente los ojos, ya que está demostrado que una persona se toca la cara más de 100 veces al día.

### **¿Cuáles son los síntomas del COVID-19?**

Los pacientes con COVID-19 han tenido enfermedad respiratoria de leve a grave con los siguientes síntomas:

- fiebre mas de 38°C
- tos
- dificultad para respirar

Y en el caso de que se complicara puede llegar a presentar: Neumonía(infección dentro del pulmón) en ambos pulmones, insuficiencia de múltiples órganos o Muerte.

### **¿Qué puedo hacer para no enfermar?**

- Evite el contacto cercano con personas enfermas.
- Evite tocarse los ojos, la nariz y la boca con las manos sin lavar.
- Lávese frecuentemente las manos con agua y jabón por almenos 20 segundos. Use un desinfectante de manos que contenga al menos un 60 % de alcohol si no hay agua y jabón.

### **Si está enfermo**

- Quedarse en casa para no contagiar a los demás.
- Cubrirse la nariz y la boca con el pliegue del codo o con un pañuelo desechable al toser o estornudar y luego botarlo a la basura.
- Limpiar y desinfectar los objetos y las superficies que se tocan frecuentemente.

## ¿Aislamiento colectivo voluntario como una mejor respuesta a COVID-19 para las poblaciones indígenas? Un estudio de caso y protocolo de la Amazonía Boliviana

### **¿Qué es la cuarentena?:**

Es una medida de aislamiento social que sirve para prevenir la propagación de la infección por coronavirus.

**¿De qué manera la cuarentena puede evitar la transmisión?** : Cuando una persona viene de una zona donde ha sido confirmada la epidemia esta puede llegar a desarrollar la enfermedad entre 6 y 10 días, por ellos se pide que esa persona sea aislada por 14 días. Para ver si tiene o no la infección. Si tiene la infección deberá permanecer bajo tratamiento y aislado hasta por 30 días. Si no tiene la infección entonces puede volver a reintegrarse a la comunidad. De esta manera evitamos que una persona infectada entre en la comunidad y pueda contagiar a los demás.

### **¿Porque es importante el aislamiento?**

1ro porque todavía no existe una vacuna para prevenir el coronavirus

2do porque una persona infectada al principio (6 o 10 días) no tiene síntomas, pero es altamente contagiosa.

3ro la infección se da cuando la persona habla, estornuda o tose expulsando gotitas de saliva donde se encuentra el virus hasta 1 metro de distancia y estas gotitas llegan a la boca, nariz y ojos de la persona sana.

También estas gotitas pueden caer en platos, vasos, (cosas de plástico, metal o madera) en ellas el virus vive hasta por días, entonces una persona sana puede infectarse con el virus al tocar esas cosas infectadas y llevarse las manos a la boca. Por eso es importante lavarse las manos con jabón antes de comer y de llevarse la mano a la boca o a los ojos.

## Appendix 2.3 Ejemplo de guiones para mensajes por radio durante Fase 1.

### Guión 1

El Coronavirus COVID-19, llegó a Bolivia!

La enfermedad de Coronavirus llegó a la comunidad de Bolivia. Esa enfermedad vino originalmente de China, y ahora se ha derramado por todos los países. Esa enfermedad puede fregar los pulmones y no ha salido tratamiento todavía. Esta enfermedad es muy peligrosa y contagiosa. Muchos ya se ha fallecieron de esta enfermedad.

Empieza con fiebre, tos seca, dolor de garganta, apreta la garganta y el pecho y no puedes respirar, Es peligroso para todas las personas: para niños, jóvenes y mayores pero es más más peligroso para los mayores de 60 años.

Esta enfermedad es más peligrosa para los que ya tienen otras enfermedades como tuberculosis, diabetes, presión alta, anemia, desnutrición y otras enfermedades de los pulmones. Por eso, nuestra población tiene alta riesgo.

Aunque nuestra población ha sufrido de enfermedades infecciosas en el pasado, esta enfermedad es muy contagiosa, más que varias otras enfermedades, y más letal una vez infectada. Puedes contagiarte cuando estas cerca de una persona enferma. La enfermedad vive en la saliva. Cuando hablas, toses o estornudas votas esta saliva. En esa saliva, hay gotitas muy pequeñas que no se pueden ver y ahí vive el virus. Si llega a tus ojos, nariz o boca puedes contagiarte.

De igual manera, si esa persona enferma agarra el celular, el plato o la jarra o cualquier otra cosa se queda en esas cosas la enfermedad. Entonces, la gente sana cuando saluda a la persona enferma o cuando toca esas cosas del enfermo que han sido contaminadas con esas gotitas pequeñitas, pueden agarrar la enfermedad.

A los 6 y 10 días, el coronavirus entra a tu cuerpo y puedes estar hasta 3 semanas enfermo si no muere antes.

Debes buscar ayuda, comunicarte con el corregido de la comunidad y que el se comunique con el número del proyecto para recibir ayuda.

### Guión 2

#### ¿Que se puede hacer para no tener la infección de coronavirus?

Si conoces de alguien que hayan llegado de un lugar donde hay la epidemia como ser Santa Cruz, Cochabamba o La Paz y esta con tos, resfrio o dolor de garganta.

- Evita acercarse a él a más de tres metros de distancia para hablar con esa persona.
- Lávate las manos por 20 segundos antes de tocarte la boca, nariz y ojos

Si usted está enfermo con tos, resfrio o dolor de garganta y ha llegado de un lugar donde hay la epidemia como ser Santa Cruz, Cochabamba o La Paz, entonces debe:

- Mantenerse separado de su familia y el resto de la comunidad por 2 semanas hasta que desaparezcan los síntomas de la enfermedad.
- Cúbrase la nariz y la boca cuando tose o estornude con un trapo o con su brazo.
- Limpie los objetos que agarra.

#### Y que se puede mi comunidad para prevenir que la infección llegue?

No deje entrar a la comunidad a gente que viene de otros lugares donde ya está la epidemia no importa si son conocidos o familiares.

## ¿Aislamiento colectivo voluntario como una mejor respuesta a COVID-19 para las poblaciones indígenas? Un estudio de caso y protocolo de la Amazonía Boliviana

### **¿Qué pasa si entran esas personas?**

- Se debe construir una casa aparte donde se queden por dos semanas; si no desarrollan signos de la enfermedad, entonces pueden entrar la comunidad.

### **¿Qué pasa si hay una persona enferma de coronavirus en mi comunidad?**

- También se debe construir otra casa aparte igual debe quedar dos semanas hasta que cure de la enfermedad.
- El enfermo debe tener su propio plato y cuchara, su propio mosquitero y ropa, su propio baño, también jabón para que lave su cuerpo, platos y ropa. Si puede cocinarse hay que darle víveres, si no puede entonces hay que servirle en su plato la persona que le cuida debe tener cuidado de no contagiarse, lavándose las manos siempre después de atenderlo.
- Finalmente, si por algún motivo la enfermedad llega a la comunidad. Los que están sanos especialmente los mayores deben irse lejos de la comunidad hasta que la enfermedad se vaya.
