# Supplementary material
Source: PubMed Central journal article supplement (PMC7228721)
Supplement: mmc2.pdf [file mmc2.pdf]

# THE LANCET

## Supplementary appendix

This translation in French was submitted by the authors and we reproduce it as supplied. It has not been peer reviewed. *The Lancet's* editorial processes have only been applied to the original in English, which should serve as reference for this manuscript.

Cette traduction en français a été proposée par les auteurs et nous l'avons reproduite telle quelle. Elle n'a pas été examinée par des pairs. Les processus éditoriaux de *Lancet* n'ont été appliqués qu'à l'original en anglais, ce qui devrait servir de référence à ce manuscrit.

Supplement to: Kaplan HS, Trumble BC, Stieglitz J, et al. Voluntary collective isolation as a best response to COVID-19 for indigenous populations? A case study and protocol from the Bolivian Amazon. *Lancet* 2020; published online May 15. [https://doi.org/10.1016/S0140-6736\(20\)31104-1](https://doi.org/10.1016/S0140-6736(20)31104-1).

## **L'isolement collectif volontaire est-il la meilleure réponse au COVID-19 pour les populations autochtones? Une étude de cas et protocole depuis l'Amazonie Bolivienne**

Prof. Hillard S. Kaplan\*, PhD<sup>1,2</sup>, Benjamin C. Trumble, PhD<sup>2,3</sup>, Jonathan Stieglitz, PhD<sup>2,4</sup>, Roberta Mendez Mamany<sup>1,2</sup>, Maguin Gutierrez Cayuba<sup>5</sup>, Leonardina Maito Moye, Lic.<sup>6</sup>, Sarah Alami†, MA<sup>2,14</sup>, Thomas Kraft, PhD<sup>2,14</sup>, Raul Quispe Gutierrez, MD<sup>2</sup>, Juan Copajira Adrian, MD<sup>2</sup>, Prof. Randall C. Thompson, MD<sup>7,8</sup>, Prof. Gregory S. Thomas, MD, MPH<sup>9,10</sup>, David E. Michalik, DO<sup>11,14</sup>, Daniel Eid Rodriguez, MD, PhD<sup>2,13</sup>, Prof. Michael D. Gurven\*, PhD<sup>2,14</sup>

<sup>1</sup>Economic Science Institute, Chapman University, Orange, CA, USA

<sup>2</sup>Tsimane Health and Life History Project, San Borja, Bolivia

<sup>3</sup>School of Human Evolution and Social Change, Center for Evolution and Medicine, Arizona State University, Tempe, AZ, USA

<sup>4</sup>Institute for Advanced Study in Toulouse, Toulouse, France

<sup>5</sup>Gran Consejo Tsimane, San Borja, Bolivia

<sup>6</sup>Asemblea Legislativa Departamental, Trinidad, Bolivia

<sup>7</sup>Saint Luke's Mid America Heart Institute, Kansas City, MO, USA

<sup>8</sup>University of Missouri–Kansas City, Kansas City, MO, USA

<sup>9</sup>Memorial Care, Southern California, USA

<sup>10</sup>Division of Cardiology, University of California at Irvine, CA, USA

<sup>11</sup>Miller Women's and Children's Hospital Long Beach, CA, USA

<sup>12</sup>Division of Pediatric Infectious Diseases, University of California at Irvine, CA, USA

<sup>13</sup>Department of Medicine, Universidad de San Simón, Cochabamba, Bolivia

<sup>14</sup>Department of Anthropology, University of California, Santa Barbara CA, USA

\*Auteurs correspondants: [gurven@anth.ucsb.edu](mailto:gurven@anth.ucsb.edu), +1(805)455-7238  
[hkaplan@chapman.edu](mailto:hkaplan@chapman.edu), +1(505)228-7309

†Sarah Alami completed this translation.

## Résumé

Quelle que soit leur pays ou région d'origine, les populations autochtones partagent des caractéristiques communes les rendant particulièrement vulnérables aux complications médicales du COVID-19, et à la mortalité qui s'en suit. Elles possèdent également des attributs résilients qui peuvent être mis en avant pour promouvoir les efforts de prévention contre ce nouveau virus. Comment prévenir et minimiser les effets dévastateurs du COVID-19 dans ces communautés? En Bolivie, où près de la moitié des citoyens s'auto-identifient comme indigènes, aucune directive spécifique n'a été définie pour les populations autochtones habitant sur des terres communales. Cet article décrit les efforts de collaboration entre anthropologues, médecins, dirigeants communautaires de tribu et responsables politiques locaux, qui ont mis en œuvre un plan de prévention et d'endiguement axé sur l'isolement collectif volontaire et le "dépistage des contacts" parmi les Tsimane, une ethnie amérindienne de l'Amazonie Bolivienne. La Phase I de ce plan comprend la sensibilisation et la préparation au COVID-19. La Phase II se concentre sur l'endiguement, la gestion des patients atteints et leur mise en quarantaine. Certaines caractéristiques de ce plan peuvent être exportées et adaptées à d'autres contextes et circonstances, afin d'éviter une mortalité généralisée parmi les populations autochtones.

## Introduction

Les peuples autochtones comptent ~ 370 millions de personnes, sont répartis dans ~90 pays, et représentent ~5% de la population mondiale<sup>1</sup>. Longtemps menacés par multiples facettes du colonialisme et de la mondialisation, ils doivent aussi faire face à l'arrivée du COVID-19 qui exacerbe les dangers portés à leur survie, leurs modes de vie, leurs cultures et leurs langues. Le virus du SARS-CoV-2 est à l'origine du COVID19 dans >200 pays et territoires, le nombre de cas confirmés et de décès étant les plus élevés aux Etats-Unis et en Europe<sup>2</sup>. Partout dans le monde, les populations autochtones partagent des caractéristiques les rendant particulièrement vulnérables aux complications médicales du COVID-19. Dans les pays à revenu faible, tout comme dans les pays à revenu intermédiaire ou élevé, elles vivent souvent dans une pauvreté extrême et ont des taux de mortalité et de morbidité plus élevés que chez les non-autochtones voisins<sup>3</sup>. Ces conditions les exposent à un risque plus élevé de complications médicales et de décès liés au COVID-19. Les infections respiratoires sont déjà une source majeure de mortalité et de morbidité parmi de nombreuses populations autochtones des pays à faible revenu. Un exemple frappant de leur vulnérabilité est celui de la pandémie de grippe H1N1 en 2009, qui a engendré chez les autochtones du continent Américain et du Pacifique une mortalité 3 à 6 fois plus élevée par rapport aux populations voisines non-autochtones<sup>4</sup>.

Le 30 Avril 2020, la Bolivie a répertorié 1167 cas officiels de COVID-19 et 62 décès, concentrés principalement dans les provinces de Santa Cruz et de La Paz (<https://www.boliviasegura.gob.bo/>). Les consignes et directives prises par le gouvernement national Bolivien depuis le 12 Mars 2020 comprennent notamment la fermeture des frontières, la suspension des déplacements entre les provinces et départements du pays, ainsi qu'un confinement obligatoire de toute la population (décrets 4196 & 4199). Les tests de dépistage demeurent néanmoins limités et accessibles principalement dans les centres urbains. Le département du Béni, majoritairement rural, et abritant plus de 18 populations autochtones, a répertorié son premier cas de COVID-19 le 20 Avril 2020. Ce département, situé en Amazonie, inclut de vastes zones couvertes de forêts ou de savannes largement consacrées à l'élevage bovin. Le Béni, lieu d'une civilisation ancestrale, fut récemment identifié comme un centre principal de domestication du manioc et de la courge<sup>5</sup> (domestiqués il y'a environ 10 000 ans). Bien que près de la moitié des Boliviens s'identifient à un peuple indigène, aucune directive spécifique, concernant la lutte

contre le COVID-19, n'a été mise en place par le gouvernement pour les communautés autochtones habitant sur des terres communales (*Tierras Comunitarias de Origen*, TCO).

Dans ce qui suit, nous tentons de mettre en évidence les vulnérabilités des populations autochtones ainsi que leurs atouts, en ce qui concerne la prévention et la lutte contre le COVID-19. Nous décrivons ensuite une expérience spécifique issue d'un effort de collaboration entre anthropologues, médecins, dirigeants communautaires de tribu et responsables politiques, qui ont entamé la mise en œuvre d'un plan de prévention contre le COVID-19 parmi les Tsimane, une ethnie amérindienne du département du Béni, en Bolivie.

## Populations autochtones: vulnérabilités et résilience

L'histoire démographique des Amérindiens est marquée par la surmortalité due aux maladies infectieuses. La variole, la rougeole et d'autres épidémies exogènes, introduites par les colons Européens depuis la fin du 15<sup>ème</sup> siècle, ont décimé près de 80% des populations autochtones amérindiennes<sup>6,7</sup>. Jusqu'à présent, le COVID-19 a déjà eu un impact sévère dans la nation Navajo, qui compte à elle seule plus de morts liées au COVID-19 que le reste du Nouveau-Mexique, dont la population est pourtant 13 fois plus grande<sup>8</sup>. En Amazonie Brésilienne, au moins 7 membres appartenant à des tribus autochtones ont été testés positif au nouveau coronavirus<sup>9</sup>, et 3 en sont morts, y compris un jeune garçon de 15 ans qui faisait partie de la tribu des Yanomami, la plus grande tribu semi-isolée d'Amérique du Sud. Ce dernier cas illustre les effets potentiellement dévastateurs du COVID-19 au sein des communautés les plus difficiles d'accès: le jeune garçon qui souffrait de symptômes pseudo-grippaux s'était rendu à l'hôpital de la ville lointaine de Roraima pour recevoir des soins médicaux. Cependant, il fut diagnostiqué tardivement, et des complications respiratoires antérieures fréquentes chez les Yanomami et d'autres populations autochtones (telles que la tuberculose pulmonaire et les infections aiguës des voies respiratoires inférieures<sup>10</sup>) aggravèrent son cas. En comparaison, les adolescents atteints de COVID-19 présentent un risque minimal de décès dans les pays industrialisés<sup>11</sup>.

Plusieurs raisons expliquent la vulnérabilité particulière des populations autochtones au COVID-19. En plus des maladies respiratoires et autres problèmes de santé augmentant le risque de mortalité, les communautés autochtones ont souvent un accès limité à l'eau potable, au savon, aux équipements de protection individuelle et à l'assainissement public<sup>12</sup>. Les services de santé qui les servent manquent aussi de financements en zone urbaine, et demeurent limités ou inexistantes dans les zones rurales les plus inaccessibles. Les hôpitaux et cliniques, déjà débordés par la forte demande de tests de dépistage et de soins dans les villes, peinent à faire face à une demande supplémentaire des ces communautés, difficiles d'accès<sup>13</sup>, et souvent victimes de stigmatisation et de discrimination. Les longs voyages vers les hôpitaux ou les cliniques régionales se font la plupart du temps dans des transports en commun, ou d'autres moyens de transport souvent bondés, entraînent des risques supplémentaires de transmission du virus. Le manque de moyens financiers et l'incapacité de payer pour les services médicaux entravent d'autant plus l'accès aux soins, lorsque ceux-ci ne sont pas couverts par des régimes d'assurance maladie gouvernementaux.

Des normes ou traditions locales peuvent aussi exacerber la propagation du virus. Chez la plupart des populations autochtones, l'esprit communautaire est une valeur fondamentale. L'importance et la proximité de la famille élargie, le travail communautaire, ainsi que le partage de la nourriture constituent des dimensions permanentes de la vie quotidienne. Sur le long-terme, cet esprit communautaire est essentiel à la survie et à la résilience de ces populations. Cependant, sur le court-terme, il peut entraver le respect des mesures de distanciation sociale, plus facilement applicables au sein de cultures individualistes aux ménages nucléaires.

Plusieurs populations autochtones rurales ont développé des liens commerciaux importants avec les villes marchandes voisines, en particulier là où les moyens de subsistance traditionnels sont en rapide disparition. D'une part, cet accès au marché, souvent assuré par des routes ou des rivières navigables, peut être vital pour assurer la sécurité alimentaire, ainsi que l'accès aux médicaments et aux prestations de sécurité sociale et autres programmes d'aide gouvernementale. D'autre part, cet accès au marché peut exacerber la transmission du virus depuis des régions plus densément peuplées. De plus, de nombreuses industries et compagnies employant des communautés autochtones ont dû fermer à cause du COVID-19, augmentant ainsi le risque d'insécurité alimentaire parmi des populations déjà marginalisées<sup>14</sup>.

Les aînés tribaux – qui exercent souvent le rôle de chef de tribu – courent le risque particulièrement élevé de succomber au COVID-19 en raison de leur âge, de certaines comorbidités (par exemple, l'hypertension ou le diabète), d'handicaps physiques liés à l'âge, et de l'immunosénescence. Or, dans un monde de plus en plus globalisé, ils sont essentiels au maintien des cultures et des langues autochtones qui pourraient disparaître avec eux. Les aînés tribaux représentent des "bibliothèques ambulantes", des spécialistes de la langue, des rituels, et de la mythologie. Ils jouent le rôle d'éducateurs et de modèles pour les plus jeunes, et contribuent de façon importante aux besoins matériels et affectifs de leurs petits-enfants dans les foyers multigénérationnels.

Bien que les populations autochtones jouissent souvent de droits fonciers leur permettant de vivre dans des territoires riches en biodiversité et dont les ressources naturelles sont protégées, en pratique, l'exploitation intensive des ressources naturelles (par exemple, via l'exploitation forestière ou minière) menace souvent leur survie et leurs modes de subsistance. Dans le nord du Brésil et au Venezuela, les orpailleurs clandestins auraient véhiculé plusieurs maladies infectieuses (par exemple, la rougeole et le paludisme) responsables de nombreux décès parmi les Yanomami depuis les années 1980, y compris récemment en 2019<sup>15,16</sup>. Les dirigeants Yanomami allèguent aujourd'hui que le cas de COVID-19 entraînant le premier décès dans leur communauté serait dû à l'exposition à un orpailleur infecté<sup>9</sup>. L'exploitation illégale des territoires autochtones pourrait aussi augmenter en raison d'un manque de surveillance gouvernementale pendant la pandémie, entraînant non seulement l'accélération de la déforestation et de la surexploitation des ressources forestières, mais également des affrontements violents accrus entre bûcherons, mineurs, orpailleurs et les communautés autochtones locales<sup>13</sup>.

L'Histoire tragique et les vulnérabilités actuelles des populations autochtones du monde entier font craindre leur dévastation massive par le COVID-19<sup>13,14,17</sup>. Compte tenu des menaces et des obstacles potentiels mentionnés ci-dessus, de nombreuses populations autochtones ont décidé que l'option la plus viable, pour lutter contre la propagation du virus dans leurs communautés, serait de restreindre ou d'interdire l'entrée d'individus étrangers sur leur territoire. Plusieurs groupes ont déjà fermé leurs frontières, en particulier ceux qui sont habitués à s'isoler en période d'épidémie<sup>14</sup>. En réponse au COVID-19, les Cris du Waswanipi, vivant au centre du Québec, ont par exemple fermé l'accès à leur territoire aux non-résidents et soumettent à leur retour les résidents ayant quitté le territoire à une quarantaine de 14 jours<sup>17</sup>. Les aborigènes Mapons de la péninsule du Cap York, en Australie, ont quant à eux imposé des restrictions de voyage plus sévères, notamment l'interdiction d'entrée sur leur territoire à tous les visiteurs, et le refus de retour aux résidents ayant voyagé en dehors du territoire<sup>18</sup>. Des centaines de communautés autochtones du Brésil, du Pérou, de la Colombie et de l'Équateur ont également fermé leurs frontières<sup>19</sup>. Celles-ci incluent les horticulteurs Shuar de l'Équateur, qui recensent actuellement les taux officiels d'infection par capita les plus élevés d'Amérique latine<sup>20</sup>. D'autres mesures visant à isoler et à protéger les individus les plus vulnérables sont activement proposées et discutées au sein de cette population<sup>21</sup>.

## Prévenir la propagation de la pandémie en Amazonie Bolivienne, dans le département du Béni

Les Tsimane de Bolivie vivent dans plus de 100 villages, la plupart situés le long des rivières Maniqui et Quiquibey, ou dans les régions forestières intérieures proches. Ils sont ~ 16 000 individus, dont 4% ont plus 60 ans. Les Tsimane produisent la quasi-totalité de leurs aliments (> 90% des calories de leur régime alimentaire)<sup>22</sup>, et n'ont accès ni à l'eau courante ni à l'assainissement public. Leur charge infectieuse élevée à cause de divers pathogènes<sup>23-25</sup>. Les maladies infectieuses, en particulier les infections respiratoires, sont responsables d'une grande partie de la morbidité et de la mortalité. La tuberculose pulmonaire et la bronchectasie demeurent largement répandues, et l'espérance de vie à la naissance n'était que de ~40 ans jusqu'à la fin du 20ème siècle<sup>26</sup>. La construction de routes dans la région depuis les années 1970 et une disponibilité accrue des transports motorisés (par exemple, des motos et des moteurs pour canoë) ont facilité les déplacements vers les villes pour certaines communautés durant les dernières décennies, en particulier vers la ville de San Borja (population ~45 000). L'accès aux soins médicaux demeure néanmoins limité: l'hôpital de San Borja ainsi qu'une clinique parrainée par des missionnaires évangélistes située à la périphérie de San Borja, fournissent des soins de base. Des chirurgies de routine effectuées par des médecins généralistes peuvent aussi être fournies à l'hôpital. Pour les communautés plus éloignées, quelques centres de santé rudimentaires sont dispersés sur tout le territoire Tsimane. Pour recevoir des soins spécialisés, il faut cependant se déplacer vers les grandes villes, notamment Trinidad, la capitale du Béni (située entre 6 et 8 heures de route depuis San Borja). Les Tsimane représentent donc une population très vulnérable au COVID-19, dont l'accès aux services médicaux est limité.

Le projet *Tsimane Health and Life History Project (THLHP)* collabore depuis 2002 avec les communautés Tsimane, dans un cadre de recherche médicale centrée sur le processus de vieillissement<sup>27,28</sup>. Le *THLHP* fournit aussi des soins de santé primaires et une surveillance biomédicale à cette population<sup>27,28</sup>. Dans le cadre de la prévention et de la lutte contre la propagation du SARS-CoV-2 au sein de cette population, nous fournissons ci-dessous un aperçu de notre expérience de travail avec les communautés Tsimane, leurs responsables politiques, ainsi que les autorités sanitaires et gouvernementales de la municipalité de San Borja.

En somme, notre stratégie de prévention et de lutte contre le COVID-19 est basée sur deux principes: Le premier étant que des mesures préventives avant une infection de masse peuvent réduire considérablement la morbidité et la mortalité; le second est basé sur l'idée que tout plan viable doit impliquer les populations autochtones dans le processus de décision. Notre plan comporte deux phases: **La Phase I**, pendant laquelle le SARS-CoV-2 se propage rapidement en Bolivie mais n'a pas encore atteint le département du Béni; et **la Phase II** (qui correspond à la situation actuelle), durant laquelle la pandémie a atteint le Béni, soit le département dans lequel vivent les Tsimane (voir le tableau 1).

### Phase I: Sensibilisation et Prévention

**Coordination avec les instances tribales représentant les populations autochtones.** Les Tsimane ont deux instances de gouvernement, le *Gran Consejo Tsimane* et le *Consejo Regional de Tsimane y Mosenen*. Des accords formels de longue date et une relation de confiance entre ces instances de gouvernement et le *THLHP* permettent à ces derniers de mener à bien leurs recherches et de fournir des soins médicaux dans les villages Tsimane. Ces liens de confiance facilitent aussi la planification et l'exécution du plan de prévention et de lutte contre le COVID-19 au sein des communautés Tsimane (voir l'Annexe 1).

**Campagnes d'information.** Notre équipe comprend 10 assistants de recherche Tsimane, tous bilingues en Tsimane et en Espagnol. La première étape de notre plan a consisté à informer notre équipe ainsi que le secrétaire à la Santé du *Gran Consejo Tsimane* sur le SARS-CoV-2 (par exemple sur l'origine du virus, son mode de transmission et les symptômes du COVID-19). Nous les avons également informé sur la difficulté à obtenir un traitement efficace. Trois médecins et les directeurs du *THLHP* ont travaillé avec les assistants de recherche pour traduire dans la langue Tsimane et adapter au contexte local, les brochures d'information émises par les *US Centers for Disease Control*<sup>29</sup>. Etant donné qu'à l'époque aucun cas de COVID-19 n'était recensé ou suspecté dans le département du Béni, et que le gouvernement national Bolivien avait déjà limité les déplacements interdépartementaux, le *THLHP* et des membres du *Gran Consejo Tsimane* (tous asymptomatiques pour le COVID-19 ou autres symptômes grippaux similaires pendant au moins 2 semaines) ont visité à partir du 25 Mars 2020 ~60 villages Tsimane pour y tenir des réunions communautaires et des campagnes de sensibilisation (Figure S1). Ces réunions avaient deux objectifs: informer les Tsimane sur le COVID-19 et entamer une discussion sur les mesures préventives potentielles (Annexes 2 et 3). Durant ces réunions, des membres du *THLHP* ont délivré des informations sur la propagation du SARS-CoV-2 dans le monde, sa période d'incubation, son mode de transmission, son degré de contagion, la nature souvent asymptomatique du virus, les vulnérabilités uniques des personnes âgées et/ou personnes souffrant d'autres problèmes de santé, l'absence de vaccin ou de médicaments curatifs, et le rôle de la distanciation sociale dans l'endiguement du virus. Les défis posés par certaines pratiques traditionnelles Tsimane, telles que le partage communautaire de *schocdye'* (bière à base de manioc fermentée), ont également été discutés. Il y'eut également une discussion sur la propagation potentielle du SARS-CoV-2 dans les villages via les interactions et échanges entre villageois Tsimane et personnes étrangères au territoire Tsimane.

**Prise de décision collective.** Comme la plupart des autres populations autochtones, les Tsimane ont déjà fait l'expérience d'épidémies locales de maladies transmissibles<sup>26</sup>. Tous les villages visités ont rapidement reconnu les risques encourus et leurs propres vulnérabilités. Historiquement, la réaction traditionnelle des Tsimane aux épidémies a été de s'isoler davantage des contacts étrangers, dans les régions les plus éloignées de leur territoire. A l'échelle de la population, le consensus pour minimiser l'exposition au COVID-19 fut rapidement "l'isolement collectif" en attendant le développement d'un vaccin ou d'un médicament curatif, une réponse similaire à celle d'autres populations autochtones<sup>17-19</sup>.

Des discussions animées avec les villageois ont porté sur la meilleure façon de réaliser un isolement collectif, y compris comment empêcher les *napo* (c.-à-d les étrangers non-Tsimane) d'entrer sur le territoire et dans les villages Tsimane, et comment réglementer les interactions entre villageois et visiteurs. Dans tous les villages, des groupes d'individus se sont portés volontaires pour construire des barrages physiques bloquant l'entrée aux villages. La plupart des réunions ont abouti à un consensus selon lequel personne ne devrait quitter le territoire pour se rendre dans une zone à risque, sauf en cas d'urgence. Il y'eut également un consensus sur la nécessité d'une quarantaine obligatoire de 14 jours dans plusieurs points d'entrées clés du territoire, pour tout villageois qui quitterait la réserve Tsimane, puis déciderait de retourner dans son village. La notion de quarantaine a été facile à expliquer étant donné l'existence de plusieurs pratiques traditionnelles similaires chez cette population, telles que le confinement des mères qui viennent d'accoucher et de leurs nouveaux-nés. Les discussions portèrent également sur la construction, par chaque famille, de huttes en matériaux locaux pour la mise en quarantaine de membres de la famille présentant des symptômes du COVID-19, ainsi que sur la meilleure manière de protéger les personnes âgées, en particulier celles souffrant d'handicaps. Dans la plupart des communautés visitées, ces discussions se sont conclues par un accord officiel, résumant les conventions collectives conclues, que les participants ont signé ou marqué de leur empreinte digitale. Ces accords constituent une preuve formelle du processus de décision collectif pour les autorités gouvernementales.

Durant ces réunions, les villageois ont également fait des demandes d'assistance matérielle qui faciliteraient l'isolement collectif. Ces demandes comprennent: 1) du savon et du sel pour compléter les denrées que les Tsimane produisent localement, 2) suffisamment de médicaments pour traiter les maladies courantes (ce qui permettrait également d'éviter aux villageois de quitter le territoire Tsimane pendant la période d'isolement), 3) des objets nécessaires pour les huttes de quarantaine (par exemple, des moustiquaires ou des ustensiles de cuisine), et 4) des objets qui permettent de sécuriser les barrages et autres barricades physiques isolant les villages pendant la période d'isolement (par exemple, des chaînes et des serrures).

Les accords et directives résultant de ces réunions constituent la base du plan de prévention pour tous les villages Tsimane.

**Coordination avec le gouvernement régional et les autorités de santé publique.** Un élément clé de cette Phase I a été de coordonner l'application des mesures ordonnées par le gouvernement national (par exemple, l'interdiction des déplacements interdépartementaux) avec les autorités policières et militaires locales, l'hôpital de San Borja et son réseau d'intervention établi pour le COVID-19, ainsi que le gouverneur du Béni et les représentants des Tsimane à l'assemblée nationale. Cela a permis à notre équipe de recevoir des permis approuvés par le gouvernement (a) pour se rendre rapidement dans les communautés Tsimane afin d'y tenir les réunions mentionnées ci-dessus, et (b) pour transporter vers le territoire Tsimane, médecins, médicaments et équipements de protection individuelle (EPI) depuis La Paz et Santa Cruz. Les accords signés durant les réunions tenues dans les communautés Tsimane ont par la suite été partagés avec les autorités, servant ainsi de base pour une demande d'assistance alimentaire et un soutien au maintien de l'isolement collectif de cette population.

Subséquentement, le gouvernement régional du Béni a fait un don de denrées alimentaires aux communautés Tsimane. Comme stipulé dans les accords résultant des réunions, notre équipe et le gouverneur du Béni sont actuellement en train de coordonner une distribution supplémentaire de denrées alimentaires, de sel et de savon dans chaque village. Notre équipe a aussi fourni à chaque village des moustiquaires et des ustensiles de cuisine pour les huttes de quarantaine, ainsi que des chaînes et des serrures pour faciliter la construction de barrages physiques bloquant l'accès aux communautés.

**Achat et distribution locale d'équipements de protection individuelle (EPI).** Comme d'autres pays, la Bolivie fait l'expérience d'une pénurie d'EPI. Le *THLHP* est actuellement en train d'acheter des masques, lunettes, et gants de type N95 pour en faire don à l'hôpital de San Borja et pour équiper le personnel médical du *THLHP*. Des masques chirurgicaux et des gants seront également distribués, au besoin, dans chaque village Tsimane. Cependant, les pénuries inévitables nécessiteront certainement des techniques de "guérilla", soit des pratiques qui permettraient de réutiliser les EPI de façon sanitaire. Des formations sur l'utilisation appropriée des EPI sur la base des directives de l'OMS ont également été dispensées.

**Prestation de soins médicaux aux patients non-COVID-19 sur le territoire Tsimane.** L'un des besoins les plus urgents pour mener à bien l'isolement collectif de la population Tsimane est la prestation de soins médicaux aux personnes atteintes de maladies autres que le COVID-19. En raison de la nature de leur environnement et du manque d'infrastructures de santé publique, les Tsimane souffrent d'une myriade de maladies infectieuses telles que les parasites intestinaux, les maladies diarrhéiques et les infections respiratoires. Ces infections courantes les amènent souvent à se déplacer en ville pour se faire soigner à l'hôpital et/ou pour acheter des médicaments en pharmacie. Notre équipe, en collaboration avec le gouvernement Bolivien, a donc mis à disposition des villageois des médecins généralistes qui demeureraient sur le territoire Tsimane pendant toute la durée de l'isolement. Ces derniers, postés dans cinq centres de santé ruraux se trouvant sur le territoire Tsimane, subviendraient à tous les besoins médicaux (dans la mesure du possible) des Tsimane pendant cette période d'isolement collectif. Le



*THLHP* a également acheté suffisamment de médicaments en prévision de la propagation du SARS-CoV-2 sur le territoire Tsimane pendant la phase II, durant laquelle les déplacements à destination ou en provenance de ce territoire posent des risques importants, ou seraient impossibles en raison des intempéries.

**Résumé de la phase I.** Avant de nous engager dans cette première phase, la plupart des Tsimane connaissaient peu de choses sur le risque encouru par le COVID-19. Ils participent désormais activement à la prévention du virus et à la maîtrise de sa propagation au sein de leurs communautés. Nous espérons que ces premières étapes les aideront à faire face à la phase II, beaucoup plus difficile.

## Phase II: Endiguement du COVID-19 et prise en charge des patients

La phase II a commencé lorsque les premiers cas de COVID-19 ont été diagnostiqués dans le département du Béni (le 20 Avril 2020). La rédaction de cet article s'est toutefois terminée avant qu'aucun cas de COVID-19 n'ait encore été confirmé dans la municipalité de San Borja, municipalité la plus proche des communautés Tsimane. Etant donné les risques de propagation du virus durant les déplacements, notre équipe a cessé de rendre visite aux villages. Cependant, si des cas suspects ou confirmés s'y présentent, nous y effectuerons du dépistage de contacts des personnes infectées depuis notre station de recherche à San Borja. Nous informerons également la population grâce à une station radio Tsimane locale (capable d'atteindre la majorité des villages) ainsi que par d'autres moyens de communication disponibles (radio à ondes courtes, téléphones portables etc.). Le *THLHP* établira également deux centres de santé supplémentaires sur le territoire Tsimane afin de faciliter l'accès au traitement pour tout problème autre que le COVID-19. Notre équipe continue par ailleurs de fournir à distance des informations actualisées sur la phase I à la population Tsimane, et nous restons en contact permanent avec les autorités locales et les autorités de santé publique présentes sur le territoire.

**Signalement de cas infectés ou suspects à la population.** Par le biais de la station radio Tsimane, nous fournirons quotidiennement des informations et mises à jour sur les cas confirmés ou suspectés. Nous fournissons déjà des informations sur le nombre de nouveaux cas et le nombre de décès en Bolivie. Une fois que le COVID-19 aura atteint la municipalité de San Borja, ces séances d'information deviendront plus détaillées, et inclueront des suggestions stratégiques. Les villages les plus éloignés n'ayant pas accès à la radio Tsimane seront informés par radio bidirectionnelle depuis notre station de recherche, et un contact permanent sera maintenu par téléphone portable avec les villages les plus proches de San Borja.

**Déclaration de cas confirmés ou suspectés aux autorités locales.** Les Tsimane pourront entrer en contact par téléphone, radio ou bouche à oreille avec le personnel de notre station de recherche (bilingue en espagnol et en Tsimane) pour signaler des cas suspects dans leurs villages. Ces cas, normalement inconnus des autorités locales, leurs seront signalés ainsi qu'au réseau d'intervention Bolivien gérant la réponse au COVID-19, ouvrant ainsi aux Tsimane la possibilité de se faire tester et de recevoir un traitement adéquat.

**Relier les cas suspects ou confirmés de COVID-19 au système d'information géographique (SIG)/ à la base de données de recensement du *THLHP*.** Le *THLHP* possède une liste presque complète des ménages Tsimane, ainsi que des données de positionnement par satellite pour toutes les familles dans les ~100 villages existants. Nous relierons les rapports sur les cas confirmés ou suspectés de COVID-19 à ces données SIG afin de retracer la propagation du virus et d'identifier les centres d'infection potentiels. Ces informations seront utilisées pour coordonner l'isolement entre les communautés affectées et non-affectées, tout en veillant à ne pas stigmatiser les individus ou les familles touchées par le COVID-19. La stigmatisation a notamment entravé les efforts de lutte contre l'Ebola en Afrique subsaharienne<sup>30,31</sup>,

ainsi que le traitement du VIH aux Etats-Unis<sup>31</sup>. Pour réduire la stigmatisation des individus atteints de COVID-19, nous mettrons l'accent sur la solidarité et l'esprit d'appartenance communautaire dans nos messages radio et autres communications. Nos messages rappelleront que quiconque risque de contracter le virus, qu'une fois rétabli et exempt de symptômes pendant deux semaines, le risque de contagion par un individu contaminé par le passé est très faible, et que ce n'est qu'avec l'unité du village et la solidarité de ses habitants que la communauté peut se protéger au mieux. Des recommandations similaires de la part des dirigeants Tsimane pourraient également renforcer et légitimer ces conseils de bonne foi.

**Coordonner le confinement au sein des communautés affectées et non-affectées.** Grâce aux données SIG et au suivi des cas suspects, nous utiliserons tous les moyens de communication disponibles pour aider les communautés Tsimane à contenir le SARS-CoV-2.

La suspicion ou confirmation de cas de COVID-19 dans une communauté déclencherait des mesures de distanciation sociale ou de quarantaine au niveau individuel et familial. Chaque famille Tsimane possède généralement des jardins horticoles suffisamment éloignés des ceux d'autres familles, et peut construire rapidement des maisons rudimentaires en utilisant des matériaux forestiers. Il est donc en théorie possible pour chaque famille de quitter le village et de s'isoler d'autres familles. Cette auto-isolation peut être préférée par les familles n'ayant pas de cas suspects ou avérés mais se trouvant par ailleurs dans des grappes résidentielles. Lors des réunions conduites durant la Phase I, nous avons suggéré que les villageois se préparent à une telle isolation, en particulier les familles comportant des membres âgés. Nous avons aussi abordé les stratégies de soin et mise en quarantaine pour les cas de COVID-19 potentiels. Par radio, et à l'aide de brochures imprimées et distribuées auparavant dans les villages, nous soutiendrons ces familles avec des conseils détaillés et adaptés au contexte local sur la façon de porter les EPI, et comment mettre en quarantaine et s'occuper des membres de la famille présentant des symptômes<sup>29</sup>. Dans les villages sans cas suspects ou confirmés de COVID-19, il sera important de néanmoins limiter les visites à destination ou en provenance d'autres villages, et leur sera également conseillé de se préparer à une isolation familiale dans des maisons secondaires.

**Tests de dépistage et tracking des contacts des personnes infectées.** Un système de dépistage rapide des cas suspects est crucial pour contenir la propagation virale. Nous poursuivons activement le développement de tests moléculaires réalisables au point de service afin de confirmer les diagnostics suspects potentiels. Pendant la période d'isolement collectif durant laquelle la plupart des villageois ne quitteront plus leur communautés, le "tracking des contacts" (ou *contact-tracing*), soit le dépistage systématique des ménages ou individus qui seraient entrés en contact avec des individus suspectés d'infection, sont des stratégies viables. Contenir le SARS-CoV-2 si sa propagation devait se produire dans certains villages serait donc possible, grâce aux efforts coordonnés entre notre équipe et les agents de santé gouvernementaux responsables de l'administration des tests de dépistage, au traitement adéquat des échantillons biologiques, à notre recensement actualisé de la population Tsimane, et enfin, grâce à la collaboration d'assistants de recherche Tsimane (certains localisés actuellement dans notre station de recherche à San Borja, d'autres dans les villages Tsimane, pour éviter les déplacements entre le territoire Tsimane et la ville de San Borja) responsables du tracking des contacts sur place. Le déploiement de ce plan est toujours en cours.

**Gestion des patients atteints de COVID-19.** Contrairement à d'autres maladies infectieuses, il n'y a pas encore de consensus unanime, parmi les médecins et chercheurs, sur le traitement du COVID-19. Le traitement par administration d'oxygène supplémentaire, l'hydratation, l'intubation trachéale et la ventilation mécanique sont toutefois indispensables dans la gestion des cas les plus sévères. L'utilisation d'antibiotiques peut aussi s'avérer nécessaire pour éviter une éventuelle surinfection bactérienne.

Sachant que le taux de mortalité du COVID-19 est de 50-80% pour les patients intubés dans les pays industrialisés<sup>32</sup>, l'intubation trachéale est sûrement inutile en l'absence d'assistance spécialisée. L'exposition à d'autres patients atteints du COVID-19 et à un personnel hospitalier potentiellement porteur du virus peuvent aussi augmenter le risque d'infection de patients Tsimane et des membres de leur famille qui les accompagneraient à l'hôpital. Ces derniers pourraient éventuellement propager le virus à leur retour dans leur village. A l'exception des cas les plus sévères, l'hospitalisation systématique de patients Tsimane atteints de COVID-19 présente plus de risques que d'avantages à l'heure actuelle.

Les patients Tsimane, dont la saturation artérielle en oxygène (évaluée à l'aide d'oxymètres de pouls) est inadéquate, pourront néanmoins se faire administrer de l'oxygène supplémentaire dans l'un des sept postes de santé du territoire Tsimane mentionnés ci-dessus. Un apport supplémentaire d'oxygène durant 24 heures peut être assuré conjointement par des lunettes nasales, des réservoirs d'oxygène et des concentrateurs d'oxygène. Cela permettrait de fournir un traitement efficace, sans intubation, à proximité de la famille du patient et dans un espace beaucoup moins encombré que l'hôpital de San Borja. Pour les patients ne nécessitant pas d'oxygène, une mise en quarantaine au sein du village peut être effectuée. Les discussions concernant les stratégies de traitement nécessiteront la participation directe des dirigeants communautaires et des membres de la famille du malade pour réduire les chances que le patient s'oppose au traitement. Toute opposition au traitement de la part de personnes atteintes s'accompagnera toutefois d'une mise en quarantaine obligatoire, et d'une surveillance des symptômes, notamment de l'hypoxie, accompagnée d'administration d'analgésiques si nécessaire.

A l'avenir, si des traitements efficaces contre le COVID-19, tels que les agents antiviraux et immunomodulateurs intraveineux, s'avèrent efficaces et disponibles, la prise en charge des patients Tsimane par les autorités de santé régionale pourrait aider à ralentir la progression de la maladie et atténuer la mortalité.

## Adapter les stratégies de prévention à d'autres populations autochtones

Les risques, les défis, et les options de réponses stratégiques auxquelles sont confrontées les communautés autochtones sont relativement similaires à celles des populations du monde entier, en raison des caractéristiques du COVID-19 lui-même. Cependant, les populations autochtones font l'expérience de risques uniques et d'opportunités différentes lorsqu'il s'agit de contenir les effets d'une pandémie telle que le COVID-19.

En ce qui concerne les risques, les zones urbaines gravement touchées sont susceptibles d'épuiser le matériel médical, les tests de dépistage et les lits d'hôpitaux, laissant peu de ressources disponibles aux populations autochtones rurales. Partout dans le monde, des problèmes similaires ont le potentiel d'élargir le fossé, en matière de santé, entre les plus riches et les minorités sociales<sup>33</sup>. Les populations autochtones possèdent toutefois des sources de résilience uniques qui peuvent être mises à profit, en particulier leur autosuffisance alimentaire, vitale dans le cadre de l'isolement collectif. Leur indépendance matérielle repose donc essentiellement sur le respect de leurs droits fonciers et leurs droits d'utilisation des terres. La souveraineté tribale, si reconnue par les gouvernements qui les encapsulent, représente un avantage important, car elle permet de faciliter les prises de décisions communautaires et leur application sur tous les niveaux. Elle est indispensable, par exemple, à la restriction des déplacements au sein comme en dehors des territoires autochtones. Il est aussi possible de capitaliser sur certaines normes culturelles telles que l'importance des liens familiaux et une tradition de prise de décision collective. Enfin, la faible densité de ces populations facilite à la fois l'isolement collectif et le tracking des contacts des personnes infectées. Toutes ces sources de résilience peuvent être mises à profit dans l'élaboration de stratégies de prévention contre la propagation du SARS-CoV-2, et d'atténuation de la mortalité due au COVID-19 parmi les populations autochtones.

Le tableau 1 fournit des suggestions généralisables pour la prévention et l'endigement du COVID-19 dans les communautés autochtones, qui découlent de notre expérience avec les Tsimane. Elles comprennent des stratégies d'implémentation ainsi que les aspects culturels et contextuels auxquels il nous a fallu particulièrement prêter attention. Dans l'idéal, les Phases I et II se produiraient de manière séquentielle, bien qu'en réalité celles-ci peuvent se chevaucher si le COVID-19 est déjà présent localement. Certains détails devront probablement être adaptés aux circonstances locales d'autres populations autochtones. L'évaluation des connaissances locales sur le COVID-19 et les campagnes de sensibilisation sont fondamentales. D'autres éléments essentiels interviennent, et incluent le respect du processus de décision collectif par les communautés elles-mêmes, et l'implication de toutes les parties prenantes concernées: membres de la communauté, dirigeants communautaires de tribu, autorités gouvernementales et autorités de santé locales, ainsi que toute autre entité impliquée dans la gestion de la réponse à la pandémie. Si les communautés décident de s'isoler collectivement, un soutien économique, médical et logistique peuvent être nécessaires pour rendre l'isolement possible. L'acquisition et la formation à l'utilisation des EPI sont aussi nécessaires, ainsi qu'un plan de traitement des maladies autres que le COVID-19 (telles que les maladies chroniques ou aiguës) pendant toute la durée de l'isolement.

En ce qui concerne la phase II, des stratégies de communication doivent être mises en place pour informer les membres de la communauté sur les cas suspects ou infectés, tout en veillant à ne pas créer de stigmatisation pouvant décourager les individus pour consulter un médecin<sup>31</sup> (pour les versions en espagnol de ces documents, voir l'annexe 4-6). Des stratégies d'endigement devraient aussi être mises en place pour éviter que le virus ne se propage dans les zones et parmi les familles non-affectées. Des mesures de distanciation sociale peuvent être appliquées au niveau du village, des ménages, et de l'individu en fonction des circonstances. Ces mesures peuvent aussi être adaptées à des contextes ruraux et culturels spécifiques. Des sources externes peuvent fournir ces communautés ainsi que les agents de santé locaux en EPI, et faciliter la mise en quarantaine des patients. S'ils sont accessibles, les tests de dépistage et la capacité de faire du tracking des contacts limiteront grandement la propagation du virus. Si le traitement par respirateur artificiel demeure le traitement le plus efficace, il peut être remplacé par des moyens innovants telles que ceux décrits ci-dessus. A mesure que le COVID-19 continue de se propager, un soutien médical spécialisé et à distance peut également être assuré par télé-médecine pour assister les agents de santé régionaux, et les informer de nouvelles thérapies et de nouvelles méthodes de gestion des patients. L'accès aux soins hospitalier deviendra plus important si les thérapies intraveineuses ainsi que les agents antiviraux et/ou immunomodulateurs s'avèrent efficaces dans le futur.

D'autres aspects de la phase II devront être adaptés aux conditions locales. L'étendue de la dépendance alimentaire de la population concernée nécessitera une modification certaine du plan d'isolement collectif. Une solution possible pour les communautés autochtones tributaires des produits du marché serait d'instituer des « marchés contrôlés » à proximité de leur territoire, mais à l'extérieur des villages pour éviter les déplacements vers la ville, et empêcher les marchands étrangers d'entrer dans les communautés. Ce processus est actuellement mis en place chez les Mose-tén, une population autochtone plus empreinte de la culture extérieure que les Tsimane, mais qui leur est culturellement et linguistiquement similaire. Pour ce faire, des arrangements doivent être conclus avec des marchands de confiance, concernant les biens que les villageois souhaitent acheter ou vendre, et sur les contrôles à mettre en place y compris les mesures de distanciation sociale spécifiques aux jours de marché ainsi que la fixation des prix de vente. Les jours de marché, les marchandises peuvent être transportées dans des zones désignées permettant aux vendeurs et acheteurs (qui utiliseraient également des EPI) de maintenir entre eux une distance physique suffisante.

## Conclusion: Agir maintenant pour une catastrophe humanitaire

L'objectif de cet article est de promouvoir des stratégies généralisables et adaptables afin d'atténuer les effets de la pandémie du SARS-CoV-2 parmi les populations autochtones. Nous supposons qu'il existe de nombreuses populations autochtones ne bénéficiant d'aucune préparation avancée à cette pandémie, et dont les besoins peuvent facilement être ignorés en raison de leur manque de ressources et de l'absence de soutien logistique adapté à leur culture. Nous encourageons une discussion plus large et immédiate des stratégies de prévention et d'endiguement entre parties prenantes. Des sites Web tels *COVID-19 and Indigenous Peoples* des Nations Unies (<https://www.un.org/development/desa/indigenouspeoples/covid-19.html>) pourraient servir de plaque tournante d'informations sur les mesures à prendre pour protéger ces populations dans le monde entier. Il est maintenant temps d'agir, avant que COVID-19 ne dévaste davantage ces populations.

### Contributions

DER, JCA, RQG, MGC, RMM et LMM ont organisé et implémenté le plan de prévention et de lutte contre le COVID-19 sur le territoire Tsimane. HSK et MDG ont conçu cet article. MDG, HSK, JS, DER, GST et DEM ont rédigé cet article. SA a traduit l'article original en français. Tous les auteurs ont apporté des idées, des commentaires et révisé le document. Tous les auteurs ont approuvé la version finale.

Déclaration d'intérêts. Les auteurs ne déclarent aucun intérêt concurrent.

**Remerciements.** Le THLHP est financé par NIH / NIA (RF1AG054442) et par NSF (1748282). JS reconnaît également le financement de l'IAST par l'Agence nationale de la recherche (ANR) dans le cadre du programme Investissements pour l'avenir (Investissements d'Avenir) (ANR-17-EURE-0010). Les agences de financement n'ont influencé aucun aspect de notre plan COVID-19 ni la décision de soumettre cet article. Nous remercions l'équipe du THLHP pour leurs efforts de prévention incessants, en particulier Arnulfo Cari Ista, Bernabe Nate Añez, Bacilio Vie Tayo, Jesus Bani Cuata, Erwin Gutierrez Cayuba, Alberto Vie Tayo, Cristian Alameda Claros, Lorgio Canchi Tayo, Marcos Renard Vasquez et Genaro Roca Moye. Nous remercions également l'équipe d'étude Horus pour son aide dans le développement de protocoles.

**Table 1.** Eléments essentiels, mise en œuvre et considérations locales pour un plan de prévention et d'endiguement du COVID-19 au sein de communautés autochtones

| <b>Phase</b>                    | <b>Eléments essentiels</b>                                                                                                                    | <b>Mise en œuvre</b>                                                                                                                                                                                               | <b>Considérations locales</b>                                                                                                                                                                                                                                                                         |
|---------------------------------|-----------------------------------------------------------------------------------------------------------------------------------------------|--------------------------------------------------------------------------------------------------------------------------------------------------------------------------------------------------------------------|-------------------------------------------------------------------------------------------------------------------------------------------------------------------------------------------------------------------------------------------------------------------------------------------------------|
| <b>Phase 1</b>                  | <b>Coordination avec les responsables communautaires</b>                                                                                      | Discussion des plans existants, évaluation des connaissances locales sur le COVID-19, demande d'assistance aux sources externes                                                                                    | Existe-t-il une représentation politique tribale centralisée ou une structure politique dispersée? Quelles sont les attitudes de la population envers les non-autochtones? Existe-t-il des relations de confiance avec les gouvernements régionaux, avec les ONG opérant dans le domaine de la santé? |
|                                 | <b>Education/Sensibilisation</b>                                                                                                              | Réunions communautaires dans les langues autochtones, dépliants, messages radio, messages «Whatsapp» et messages via les réseaux sociaux                                                                           | Quels sont les modalités de communication disponibles, le niveau connaissance existant du COVID-19, la compréhension de la transmission des maladies                                                                                                                                                  |
|                                 | <b>Prise de décision collective</b>                                                                                                           | Réunions communautaires, discussion des termes de l'isolement collectif, formation de comités chargés de faire respecter les décisions, documentation des décisions collectives                                    | Langue (s) parlée (s)<br>Statut juridique du territoire tribal et capacité à isoler la population, pratiques culturelles concernant la prise de décision, niveau d'autosuffisance alimentaire.                                                                                                        |
|                                 | <b>Coordination avec le gouvernement régional et les autorités de santé publique</b>                                                          | Explications des stratégies de gestion existantes du COVID-19, demande d'appui extérieur, communication et application des décisions d'isolement communautaire collectif                                           | Y' a-t-il un plan de confinement dans le reste du pays? Existe-t-il une politique visant les communautés autochtones ?<br>Quel est le rôle potentiel des ONG dans ce plan et la structure du processus de décision ?                                                                                  |
|                                 | <b>Achat d'EPI et formation à l'utilisation des EPI</b>                                                                                       | Evaluation de l'autosuffisance alimentaire et des pénuries existantes, levées de fonds, approvisionnement des communautés en denrées alimentaires, médicaments, vidéos pédagogiques et autres produits nécessaires | Existe-t-il des stocks locaux / nationaux d'EPI? Les EPI sont-ils disponibles localement? Les agents de santé sont-ils formés à leur utilisation ?                                                                                                                                                    |
|                                 | <b>Soins médicaux sur le territoire pour les maladies autres que le COVID-19 afin de prévenir l'exposition au virus en milieu hospitalier</b> | Postes de santé ruraux, équipe médicale itinérante, soutien médical                                                                                                                                                | Infrastructure médicale locale, disponibilité des médicaments et des tests de dépistage, morbidités courantes et leurs symptômes, comparaison avec les symptômes du COVID-19                                                                                                                          |
| <b>Transition: Phase 1 to 2</b> | <b>Soutien à l'isolement collectif</b>                                                                                                        | Chaîne d'approvisionnement sécurisée pour les médicaments, les tests de dépistage et les produits de première nécessité, mise en application du blocus à l'entrée des communautés                                  | Autonomie territoriale, autosuffisance alimentaire vs. besoins tributaires du marché, transport et accès aux communautés, chaînes d'approvisionnement en place?                                                                                                                                       |
| <b>Phase 2</b>                  | <b>Déclaration des cas suspects ou confirmés à la population</b>                                                                              | Réseau de contacts au sein de chaque village, communication via les réseaux sociaux, téléphone portables, radio, et soutien financier à la communication                                                           | Disponibilité des moyens de communications, identification de la nature des rapports entre individus au sein des communautés et entre différentes communautés                                                                                                                                         |
|                                 | <b>Déclaration de cas suspects ou confirmés aux autorités locales</b>                                                                         | Communication avec les équipes locales d'intervention pour enquêter sur les cas suspects                                                                                                                           | Infrastructure locale enquêtant sur les cas suspects, ressources humaines existantes, niveau de confiance entre la population locale et les autorités                                                                                                                                                 |
|                                 | <b>Mappage de cas suspects ou confirmés</b>                                                                                                   | Mapping des individus, ménages/ communautés affectés, ajustement du plan d'isolement selon les hotspots épidémiques locaux                                                                                         | Disponibilité du recensement et de données géographiques, fluidité de la communication avec les communautés locales                                                                                                                                                                                   |
|                                 | <b>Coordination des quarantaines</b>                                                                                                          | Communication par radio, par téléphone et en personne pour isoler les familles des individus affectés des autres familles, et pour isoler les communautés non affectées des communautés affectées                  | Toutes les considérations ci-dessus, distribution géographique des ménages dans et des communautés dans l'espace, obstacles à l'isolement aux niveaux individuel, familial et communautaire                                                                                                           |
|                                 | <b>Tests de dépistage et dépistage des contacts</b>                                                                                           | Enquête sur chaque cas suspecté, sur sa source, et tests de dépistage pour tous les contacts potentiellement affectés                                                                                              | Disponibilité des tests de dépistage, ainsi que des ressources humaines pour le dépistage des contacts, fréquence des                                                                                                                                                                                 |

**Gestion des patients**

Mise en quarantaine des cas moins sévères, mesure périodique de l'oxygène dans le sang des patients symptomatiques, oxygénothérapie à haut débit, pronation, administration d'agents antiviraux et autres traitements en fonction de leur disponibilité

contacts entre les familles et avec le monde extérieur  
Toutes les considérations ci-dessus, mises à jour des stratégies de traitement selon les avancées de la recherche et disponibilité des modalités de traitement

---

## Références

1. <https://www.worldbank.org/en/topic/indigenouspeoples>. 2020 (accessed April 20, 2020).
2. <https://www.worldometers.info/coronavirus/countries-where-coronavirus-has-spread/>. (accessed April 30, 2020).
3. Gracey M, King M. Indigenous health part 1: determinants and disease patterns. *The Lancet* 2009; **374**(9683): 65-75.
4. La Ruche G, Tarantola A, Barboza P, Vaillant L, Gueguen J, Gastellu-Etchegorry M. The 2009 pandemic H1N1 influenza and indigenous populations of the Americas and the Pacific. *Eurosurveillance* 2009; **14**(42): 19366.
5. Lombardo U, Iriarte J, Hilbert L, Ruiz-Pérez J, Capriles JM, Veit H. Early Holocene crop cultivation and landscape modification in Amazonia. *Nature* 2020: 1-4.
6. Cook ND. Born to die: disease and New World conquest, 1492-1650: Cambridge University Press; 1998.
7. Mann CC. 1491: New revelations of the Americas before Columbus: Alfred a Knopf Incorporated; 2005.
8. Romero S. Checkpoints, curfews, airlifts: virus rips through Navajo nation. New York Times. 2020 April 10, 2020.
9. Phillips T. Covid-19 fears grow for indigenous South Americans as Yanomami teen tests positive. Guardian. 2020 April 8, 2020.
10. Sousa AO, Salem JI, Lee FK, et al. An epidemic of tuberculosis with a high rate of tuberculin anergy among a population previously unexposed to tuberculosis, the Yanomami Indians of the Brazilian Amazon. *Proceedings of the National Academy of Sciences* 1997; **94**(24): 13227-32.
11. Team CC-R. Severe Outcomes Among Patients with Coronavirus Disease 2019 (COVID-19) — United States, February 12–March 16, 2020, 2020.
12. Ferrante L, Fearnside PM. Protect Indigenous peoples from COVID-19. *Science* 2020; **368**(6488): 251.
13. Soares J. Brazil: Indigenous people in the Amazon brace for coronavirus. dwcom. 2020 April 6, 2020.
14. Wight A. Coronavirus 'could devastate' indigenous communities. SciDevNet. 2020 April 1, 2020.
15. Smith R. Measles outbreak threatens isolated Amazonian tribe. CNN. 2018 July 5, 2018.
16. Fraser B. Measles outbreak in the Americas. *The Lancet* 2018; **392**(10145): 373.
17. Coletta A, Traiano H. The world's indigenous peoples, with tragic history of disease, implore outsiders to keep coronavirus away. Washington Post. 2020 March 31, 2020.
18. Mounter B. Self-imposed coronavirus lockdown part of Cape York efforts to protect vulnerable communities. ABC Far North. 2020 March 23, 2020.
19. Collyns D, Cowie S, Parkin Daniels J, Phillips T. 'Coronavirus could wipe us out': indigenous South Americans blockade villages. Guardian. 2020 March 30, 2020.
20. León Cabrera JM, Kurmanaev A. Ecuador Gives Glimpse Into Pandemic's Impact on Latin America. New York Times. 2020 April 8, 2020.



21. Allam L. Indigenous elders ask to be evacuated from remote communities over coronavirus fears. *Guardian*. 2020 April 3, 2020.
22. Kraft TS, Stieglitz J, Trumble BC, Martin M, Kaplan H, Gurven M. Nutrition transition in 2 lowland Bolivian subsistence populations. *The American journal of clinical nutrition* 2018; **108**(6): 1183-95.
23. Blackwell AD, Trumble BC, Maldonado Suarez I, et al. Immune Function in Amazonian Horticulturalists. *Annals of Human Biology* 2016; **43**(4): 382-96.
24. Vasunilashorn S, Finch CE, Crimmins EM, et al. Inflammatory gene variants in the Tsimane, an indigenous Bolivian population with a high infectious load. *Biodemography and Social Biology* 2011; **57**(1): 33-52.
25. Dinkel KA, Costa ME, Kraft TS, et al. Relationship of sanitation, water boiling, and mosquito nets to health biomarkers in a rural subsistence population. *American Journal of Human Biology* 2020: e23356.
26. Gurven M, Kaplan H, Supa AZ. Mortality experience of Tsimane Amerindians of Bolivia: Regional variation and temporal trends. *American Journal of Human Biology* 2007; **19**(3): 376-98.
27. Gurven M, Stieglitz J, Trumble B, et al. The Tsimane Health and Life History Project: Integrating anthropology and biomedicine. *Evolutionary Anthropology: Issues, News, and Reviews* 2017; **26**(2): 54-73.
28. Kaplan H, Thompson RC, Trumble BC, et al. Coronary atherosclerosis in indigenous South American Tsimane: a cross-sectional cohort study. *Lancet* 2017; **389**(10080): 1730-9.
29. Prevention CfDCa. Coronavirus Disease 2019 (COVID-19) Print Resources. 2020. <https://www.cdc.gov/coronavirus/2019-ncov/communication/print-resources.html>.
30. Barry SH, Richard PA. Cultural Contexts of Ebola in Northern Uganda. *Emerging Infectious Disease journal* 2003; **9**(10): 1242.
31. Reluga TC, Smith RA, Hughes DP. Dynamic and game theory of infectious disease stigmas. *Journal of Theoretical Biology* 2019; **476**: 95-107.
32. Yang X, Yu Y, Xu J, et al. Clinical course and outcomes of critically ill patients with SARS-CoV-2 pneumonia in Wuhan, China: a single-centered, retrospective, observational study. *The Lancet Respiratory Medicine* 2020.
33. Board NTE. How to Save Black and Hispanic Lives in a Pandemic. *New York Times*. 2020 April 11, 2020.

## ANNEXES

### CONTENU

**1. Figure S1.** (a, b) Réunions de communautés Tsimane pendant la phase I; c) Un barrage visant à empêcher les non-Tsimane d'entrer dans une communauté Tsimane; d) Distribution de sel et de savon pour faciliter la mise en quarantaine des cas suspects de COVID-19. Source: l'équipe du *THLHP*.

### 2. Détails du protocole

2.1. Structure organisationnelle des collaborations locales ayant pour but la prévention et l'endiguement du COVID-19 (Français).

2.2. Exemple d'un compte-rendu d'une réunion avec des villageois Tsimane durant la Phase I (Français).

2.3. Exemple d'un message radio émit pendant la Phase I (Français).

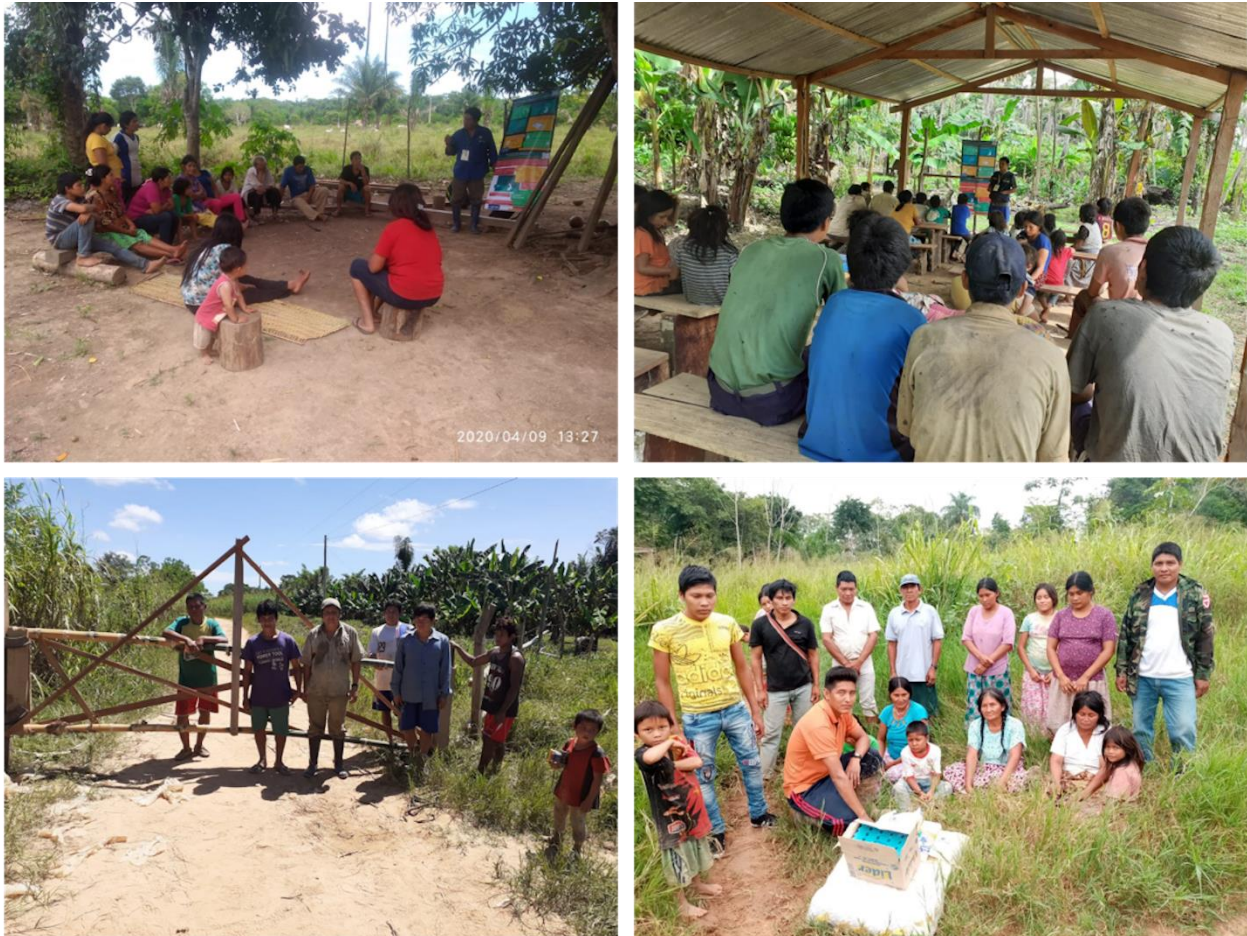

**Figure S1.** (a, b) Réunions de communautés Tsimane pendant la phase I; c) Un barrage visant à empêcher les non-Tsimane d'entrer dans une communauté Tsimane; d) Distribution de sel et de savon pour faciliter la mise en quarantaine des cas suspects de COVID-19. Source: l'équipe du *THLHP*.

**Appendix 2.1.** Structure organisationnelle des collaborations locales ayant pour but la prévention et l'endigement du COVID-19

STRUCTURE ET FONCTIONS DU COMITE LOCAL DE SURVEILLANCE TSIMANE CONTRE LE CORONAVIRUS

PARTENAIRES DU PLAN DE PREVENTION ET DE LUTTE CONTRE LE CORONAVIRUS DANS LES COMMUNAUTES TSIMANE

- GRAN CONSEJO TSIMANE, représenté par Mr. Maguin Gutierrez Cayuba.
- TSIMANE HEALTH AND LIFE HISTORY PROJECT, représenté par Drs. Hillard Kaplan, Michael Gurven, Jonathan Stieglitz, et Benjamin Trumble.
- STATION BIOLOGIQUE DU BENI, représentée par Mme. Carola Vaca
- FONDATION DE SOLIDARITE MEDICALES (ILES CANARIES), représentée par Dr. Sergio Bejarano

COMPOSITION DE L'EQUIPE DE SURVEILLANCE

- a) Chef de village.
- b) Représentant des personnes âgées.
- c) Représentant des femmes.
- d) Représentant du projet *Tsimane Health and Life History Project*.
- e) Représentant du Gran Consejo Tsimane.

FONCTIONS DE L'EQUIPE DE SURVEILLANCE

- a) Appliquer les règles communautaires concernant le traitement des cas suspects.
- b) Superviser la construction des huttes de quarantaine pour les cas suspects et leur contacts.
- c) Gérer la prise en charge des patients Tsimane atteints de COVID-19 et de leur contacts potentiels.
- d) Signaler les cas suspects ou confirmés aux autorités sanitaires locales et à l'équipe médicale du THLHP .
- e) Tenir des réunions de village pour informer les villageois nouveaux développements, et coordonner l'activité du village pendant la pandémie.

DEFINITIONS OPERATIONNELLES

**Définition d'un cas suspect.**

- Une fois l'épidémie déclenchée dans la région, une personne souffrant de toux et de fièvre, avec ou sans problèmes respiratoires, et provenant d'une région ayant déjà signalé des cas confirmés de COVID-19 sera considérée comme un cas suspect.

**Définition d'un contact probable.**

- Toute personne provenant d'une zone épidémique active de COVID-19.

QUARANTAINE

**Qui sera mis en quarantaine?**

- Les personnes qui répondent à la définition d'un cas suspect et d'un contact probable.

### **En quoi consistera la quarantaine?**

- La quarantaine consistera à séparer les cas suspects et les contacts probables du reste de la communauté. Pour cela, ils bénéficieront d'un environnement pour se reposer. Nous leur fournirons de la vaisselle (assiettes, cuillères, tasses etc.) afin que les membres de leur famille puissent livrer leur nourriture en toute sécurité pendant leur quarantaine. Ils recevront également du savon pour se laver les mains, des vêtements, ainsi que des ustensiles de cuisine.

### **Durée de la quarantaine**

- Les contacts potentiels de personnes atteintes ou soupçonnées doivent être mis en quarantaine et en observation pendant douze jours, pour voir s'ils présentent des symptômes; s'ils ne présentent aucun symptôme, ils peuvent rejoindre leur famille et leur communauté. Les cas suspects doivent recevoir des soins médicaux (du centre de santé le plus proche) et doivent être mis en quarantaine jusqu'à ce que leurs symptômes disparaissent. Ils recevront de la nourriture et des médicaments pendant toute la durée de leur rémission, ainsi que des visites médicales quotidiennes pour évaluer la progression de leur état, ainsi que la possibilité d'un transfert vers des centres de santé plus spécialisés.

### **EQUIPEMENT POUR CHAQUE COMITE DE SURVEILLANCE**

- a) Détergent, assiette, bol, cuillère, fourchette et tasse pour les cas suspects.
- b) Trousse de premiers soins pour la communauté.
- c) Médicaments et autres objets nécessaires à la coordination avec les centres de santé locaux, pour empêcher les patients atteints de maladies traitables de premier niveau de se rendre à San Borja.

**Annexe 2.2.** Exemple de script utilisé lors de réunions avec les communautés Tsimane, pendant la phase I (Français).

### **Introduction**

Nous nous trouvons dans une situation particulière, à cause d'une maladie appelée COVID-19. Cette maladie a commencé en Chine en décembre 2019. Elle s'est ensuite propagée dans plusieurs pays et continents, tuant des centaines de personnes par jour dans de nombreux pays. Plus de 170 000 personnes sont décédées dans le monde de COVID-19. La maladie a déjà atteint la Bolivie; nous avons des centaines de cas en Bolivie, c'est précisément la raison pour laquelle nous tenons cette réunion.

### **Qu'est-ce que COVID-19 et le coronavirus?**

Le COVID-19 est une maladie respiratoire contagieuse, tout comme le rhume. Le COVID-19 est causé par un virus appelé coronavirus. À l'heure actuelle, il n'existe aucun vaccin ni médicament pour prévenir ou guérir le COVID-19.

Le risque de contracter la maladie est plus élevé pour les personnes de plus de 50 ans, les personnes diabétiques, les personnes souffrant d'hypertension, de maladies rénales, de maladies cardiaques d'anémie, et de malnutrition, ainsi que les personnes dont le système immunitaire est compromis.

### **Comment se propage le coronavirus?**

Le virus a probablement commencé à se propager chez un animal autre que l'Homme, mais il peut se propager maintenant d'une personne à l'autre. Le virus se propage principalement entre les personnes qui sont en contact étroit les unes avec les autres (à moins d'un mètre de distance), par le biais de gouttelettes qui se produisent lorsqu'une personne infectée tousse ou éternue. On peut également contracter le COVID-19 en touchant une surface ou un objet infecté par le virus, puis en touchant sa bouche, son nez ou éventuellement ses yeux. Il a d'ailleurs été démontré que nous touchons en moyenne notre visage plus de 100 fois par jour. Ces gouttelettes peuvent tomber sur des assiettes, des verres ou d'autres objets en plastique, en métal ou en bois; le virus peut vivre au moins une journée (et peut-être plus) à l'intérieur de ces objets. Une personne en bonne santé peut donc être infectée par le virus en touchant ces choses infectées et en mettant la main à la bouche. Il est important de se laver les mains avec du savon avant de manger ou avant de mettre la main sur la bouche ou les yeux.

### **Quels sont les symptômes de COVID-19?**

Le COVID-19 peut avoir des répercussions légère à sévère avec les symptômes suivants:

- une fièvre supérieure à 38 ° C
- une toux sèche
- une difficulté à respirer
- Pour les cas les plus sévères, il peut aussi conduire à: une pneumonie (infection) dans les deux poumons, une défaillance d'un ou plusieurs organes, ou la mort.

### **Que puis-je faire pour éviter cette maladie?**

- Évitez tout contact proche avec des personnes malades.
- Évitez de toucher vos yeux, votre nez et votre bouche avec des mains sales ou non lavées.

- Lavez-vous fréquemment les mains à l'eau et au savon pendant au moins 20 secondes. Si possible, vous pouvez également utiliser un désinfectant pour les mains contenant au moins 60% d'alcool (si le savon et l'eau ne sont pas disponibles).

### **Que dois-je faire si je me sens malade?**

- Rester à la maison pour ne pas infecter les autres.
- Me couvrir le nez et la bouche avec le pli du coude ou un tissu ou mouchoir jetable lorsque je tousse ou lorsque j'éternue, puis jeter le tissu ou mouchoir.
- Nettoyer et désinfecter les objets et les surfaces fréquemment touchés.

### **Qu'est-ce que la quarantaine?**

La quarantaine est une mesure d'isolement social qui sert à prévenir la propagation du coronavirus.

### **Comment la quarantaine peut-elle empêcher la transmission?**

Lorsqu'une personne vient d'une région où l'épidémie a été confirmée, elle peut alors développer la maladie dans les 6 à 10 jours qui suivent tout en demeurant asymptomatique. Cette personne doit s'isoler pendant 14 jours, pour voir si elle a ou non été infectée par le coronavirus. Si elle est infectée, il lui faut rester sous traitement et en quarantaine pendant 30 jours. Si elle est saine, elle peut à nouveau rejoindre sa communauté. De cette façon, nous empêchons une personne infectée d'entrer dans la communauté et de la transmettre aux autres.

### **Pourquoi l'isolement est-il important?**

- Parce qu'il n'y a toujours pas de vaccin pour prévenir le coronavirus.
- Parce qu'une personne infectée au début (au cours des 6 à 10 premiers jours) peut ne présenter aucun symptôme de maladie, tout en étant très contagieuse.

### **Annexe 2.3. Exemples de scripts pour les messages radio émis durant la phase I (Français).**

#### ***Script 1***

URGENT: Le Coronavirus et le COVID-19 se propagent en Bolivie.

La maladie du coronavirus a atteint la Bolivie. La maladie, originaire de Chine, s'est maintenant propagée à des pays du monde entier. La maladie peut gravement affecter les poumons et aucun traitement n'a encore été développé. Cette maladie est très dangereuse et contagieuse. Beaucoup en sont déjà morts.

La maladie commence par de la fièvre, une toux sèche et des maux de gorge. Votre gorge et votre poitrine sont serrées et vous ne pouvez plus respirer. C'est dangereux pour tout le monde: pour les enfants, les jeunes et les vieux, mais pour les plus de 60 ans sont particulièrement en danger.

Cette maladie est plus dangereuse pour ceux qui ont déjà d'autres maladies telles que la tuberculose, le diabète, l'hypertension artérielle, l'anémie, la malnutrition et d'autres maladies des poumons. Par conséquent, notre population Tsimane est à haut risque.

Bien que notre population de Tsimane ait souffert de maladies infectieuses par le passé, il faut savoir que cette maladie est bien plus contagieuse que d'autres maladies que vous connaissez ou dont vous avez entendu parler, et plus mortelle une fois infecté. Vous pouvez être contaminé si vous vous tenez près d'une personne malade. Le virus vit dans la salive. Lorsque nous parlons, toussons ou éternuons, nous émettons cette salive. Dans cette salive, il y a de très petites gouttelettes invisibles et le virus y vit. Si une gouttelette atteint vos yeux, votre nez ou votre bouche, vous pouvez contracter le virus et la maladie.

Si une personne malade utilise une assiette, une tasse ou un autre objet, le virus reste dans ces choses sous forme de gouttelettes. Ainsi, les personnes en bonne santé qui saluent des personnes malades ou qui touchent les mêmes objets contaminés par ces minuscules gouttelettes, peuvent elles-mêmes être contaminées.

Au cours des 6 à 10 premiers jours, le coronavirus pénètre votre corps et vous peut vous rendre malade pendant trois semaines si vous ne mourez pas plus tôt.

Vous devriez demander de l'aide: contactez le chef de la communauté, afin qu'il contacte un membre du projet Tsimane Health and Life History Project (par exemple, par téléphone ou par radio) pour recevoir de l'aide.

## **Script 2**

Que faire pour éviter le coronavirus?

Si vous connaissez des personnes en provenance de Trinidad, Santa Cruz, Cochabamba ou La Paz ayant une toux, un rhume ou un mal de gorge:

- Évitez de les approcher (c'est-à-dire, restez à > 3 mètres).
- Lavez-vous les mains pendant 20 secondes avant de toucher votre bouche, votre nez et vos yeux.

Si vous êtes malade avec une toux, un rhume ou un mal de gorge et que vous revenez de Trinidad, Santa Cruz, Cochabamba ou La Paz, alors vous devez:

- Rester séparé de votre famille et du reste de la communauté pendant deux semaines jusqu'à ce que les symptômes de la maladie disparaissent.
- Vous couvrir le nez et la bouche lorsque vous toussiez ou éternuez avec un chiffon ou votre bras.
- Nettoyer tous les objets que vous touchez.

Que peut faire ma communauté pour endiguer le COVID?

Ne laissez pas entrer dans votre communauté des gens en provenance d'endroits où l'épidémie existe déjà, qu'ils soient membres de la famille, amis ou connaissances.

Que se passe-t-il si ces gens entrent dans mon village?

- Une maison séparée de la votre devrait être construite. Ils devront y loger pendant deux semaines; s'ils ne développent pas de signes de la maladie, ils peuvent vous rejoindre chez vous.

Que faire s'il y a une personne atteinte de coronavirus dans ma communauté?

- Une autre maison séparée doit également être construite, car il faut attendre deux semaines avant que la maladie ne disparaisse.
- Les patients doivent avoir leurs propres assiettes, tasses, cuillères, moustiquaires et ses vêtements, un endroit où aller aux toilettes et du savon pour se laver. S'ils peuvent cuisiner pour eux-mêmes, ils pourront recevoir de la nourriture à cuisiner; s'ils ne peuvent pas cuisiner pour eux-mêmes, alors ils doivent être servis dans leur propre assiette. Le soignant doit veiller à ne pas contracter la maladie, par exemple en se lavant toujours les mains après avoir fourni de la nourriture au patient.



- Enfin, si pour une raison quelconque, la maladie atteint la communauté, les résidents en bonne santé - en particulier les personnes âgées - devraient quitter la communauté jusqu'à ce que la maladie disparaisse.
