# Supplementary material
Source: PubMed Central journal article supplement (PMC7228721)
Supplement: mmc3.pdf [file mmc3.pdf]

# THE LANCET

## Supplementary appendix

This translation in French was submitted by the authors and we reproduce it as supplied. It has not been peer reviewed. *The Lancet's* editorial processes have only been applied to the original in English, which should serve as reference for this manuscript.

Supplement to: Kaplan HS, Trumble BC, Stieglitz J, et al. Voluntary collective isolation as a best response to COVID-19 for indigenous populations? A case study and protocol from the Bolivian Amazon. *Lancet* 2020; published online May 15. [https://doi.org/10.1016/S0140-6736\(20\)31104-1](https://doi.org/10.1016/S0140-6736(20)31104-1).

# Isolamento coletivo voluntário como melhor resposta ao COVID-19 para populações indígenas? Um estudo de caso e protocolo da Amazônia boliviana

Prof. Hillard S. Kaplan, PhD<sup>1,2,\*</sup>, Benjamin C. Trumble, PhD<sup>2,3</sup>, Jonathan Stieglitz, PhD<sup>2,4</sup>, Roberta Mendez Mamany<sup>1,2</sup>, Maguin Gutierrez Cayuba<sup>5</sup>, Leonardina Maito Moye, Lic.<sup>6</sup>, Sarah Alami, MA<sup>2,14</sup>, Thomas Kraft, PhD<sup>2,14</sup>, Raul Quispe Gutierrez, MD<sup>2</sup>, Juan Copajira Adrian, MD<sup>2</sup>, Prof. Randall C. Thompson, MD<sup>7,8</sup>, Prof Gregory S. Thomas MD, MPH<sup>9,10</sup>, David E. Michalik, DO<sup>11,14</sup>, Daniel Eid Rodriguez, MD, PhD<sup>2,13</sup>, Prof. Michael D. Gurven, PhD<sup>2,14,\*</sup>

<sup>1</sup>Instituto de Ciências Econômicas, Chapman University, Orange, CA, EUA

<sup>2</sup>Projeto de História de Saúde e Vida Tsimane, San Borja, Bolívia

<sup>3</sup>Escola de Evolução Humana e Mudança Social, Centro de Evolução e Medicina, Universidade Estadual do Arizona, Tempe, AZ, EUA

<sup>4</sup>Instituto de Estudos Avançados em Toulouse, Toulouse, França

<sup>5</sup>Gran Consejo Tsimane, San Borja, Bolívia

<sup>6</sup>Asemblea Legislativa Departamental, Trinidad, Bolívia

<sup>7</sup>Instituto do Coração da América St Luke's, Kansas City, MO, EUA

<sup>8</sup>Universidade do Missouri – Kansas City, Kansas City, MO, EUA

<sup>9</sup>Memorial Care, Sul da Califórnia, EUA

<sup>10</sup>Divisão de Cardiologia, Universidade da Califórnia em Irvine, CA, EUA

<sup>11</sup>Miller Children's and Children's Hospital Long Beach, CA, EUA

<sup>12</sup>Divisão de Doenças Infecciosas Pediátricas, Universidade da Califórnia em Irvine, CA, EUA

<sup>13</sup>Departamento de Medicina, Universidade de San Simón, Cochabamba, Bolívia

<sup>14</sup>Departamento de Antropologia, Universidade da Califórnia, Santa Barbara CA, EUA

\*Autores correspondentes: [gurven@anth.ucsb.edu](mailto:gurven@anth.ucsb.edu), +1(805)455-7238

[hkaplan@chapman.edu](mailto:hkaplan@chapman.edu), +1(505)228-7309

Translated by Mathew Schwartz, Department of Anthropology, University of New Mexico, Albuquerque, NM 87131, USA

## Resumo

As comunidades indígenas em todo o mundo compartilham características comuns que as tornam especialmente vulneráveis ao COVID-19, complicações e mortalidade. Eles também possuem atributos resilientes que podem ser aproveitados para promover esforços de prevenção. Como as comunidades indígenas podem mitigar melhor os efeitos devastadores do COVID-19? Na Bolívia, onde quase metade de todos os cidadãos afirmam origens indígenas, nenhuma diretriz específica foi delineada para comunidades indígenas que habitam territórios comunais nativos. Aqui, descrevemos os esforços colaborativos como antropólogos, médicos, líderes tribais e autoridades locais para desenvolver e implementar um plano de prevenção e contenção ao COVID-19, focado no isolamento coletivo voluntário e no rastreamento de contatos entre horticultores de Tsimane na Amazônia boliviana. A Fase I envolve educação, divulgação e preparação, enquanto a Fase II se concentra na contenção, gerenciamento de pacientes e quarentena. As características deste plano podem ser exportadas e adaptadas às circunstâncias locais em outros lugares para evitar a mortalidade generalizada nas comunidades indígenas.

## Introdução

Os mais de 370 milhões de povos indígenas que vivem em ~ 90 países representam ~5% da população global.<sup>1</sup> Suas formas de vida, idioma e cultura são ameaçadas há muito tempo pelas muitas facetas do colonialismo e da globalização, e seus meios de subsistência e vidas estão agora novamente em risco em meio à pandemia de coronavírus. O SARS-CoV-2 causou COVID-19 em mais de 200 países e territórios, com o número de casos confirmados e mortes mais altos nos Estados Unidos e na Europa.<sup>2</sup> Os povos indígenas em todo o mundo compartilham características comuns que os tornam especialmente vulneráveis ao COVID-19. As populações indígenas sofrem taxas mais altas de extrema pobreza, morbidade e mortalidade do que seus vizinhos não indígenas em todo o espectro de países de baixa a alta renda.<sup>3</sup> Essas condições colocam os povos indígenas em maior risco de complicações e morte por COVID-19. As infecções respiratórias já são uma importante fonte de morbimortalidade em muitas populações indígenas em países de baixa renda. Como um forte indicador do que potencialmente poderia ocorrer, a pandemia de influenza H1N1 de 2009 resultou em uma mortalidade 3-6 vezes maior entre as populações indígenas versus as não indígenas das Américas e do Pacífico.<sup>4</sup>

Em 30 de abril de 2020, a Bolívia tinha 1.167 casos confirmados de COVID-19 e 62 mortes, confinados em grande parte às províncias de Santa Cruz e La Paz (<https://www.boliviasegura.gob.bo/>). A resposta do governo nacional boliviano ao COVID-19 começou em 12 de março de 2020 e incluiu o fechamento de fronteiras, a suspensão de transportes interdepartamental e interprovíncia e quarentena nacional (Decretos 4196 e 4199). Os testes foram limitados e focados principalmente em centros urbanos. O Departamento de Beni, lar de mais de 18 populações indígenas, é principalmente rural, com seu primeiro caso confirmado de COVID-19 relatado em 20 de abril de 2020. Essa floresta de planície e região de savana já testemunhou uma civilização grande e sofisticada, recentemente identificada como um dos cinco principais centros de domesticação precoce de plantas - o primeiro a domesticar mandioca e abóbora ~10.000 anos atrás.<sup>5</sup> Apesar de quase metade dos bolivianos serem considerados de origem indígena, nenhuma diretriz específica foi delineada para grupos indígenas remotos que habitam territórios comunais nativos (*Tierras Comunitarias de Origen*, TCO).

A seguir, destacamos, primeiramente, aspectos gerais das populações indígenas relevantes para a atual pandemia do COVID-19 e, em seguida, revisamos nossa experiência específica em um esforço

colaborativo para desenvolver e implementar um plano de prevenção do COVID-19 entre horticultores bolivianos do Departamento de Beni.

## Populações indígenas: vulnerabilidades e resiliência

O excesso de mortalidade por doenças infecciosas tem uma longa história entre as populações indígenas. Varíola, sarampo e outras epidemias de solo virgem eliminaram até 80% das populações nativas nas Américas após o contato europeu.<sup>6,7</sup> Até agora, o COVID-19 já impactou fortemente a nação navajo nos EUA, com mais mortes na nação navajo do que no resto do Novo México, que tem uma população 13 vezes maior.<sup>8</sup> Ao mesmo tempo, pelo menos sete indígenas da Amazônia brasileira deram positivo e três morreram, incluindo um garoto de 15 anos da maior tribo semi-isolada da América do Sul, os Yanomami. O último caso ilustra o potencial do COVID-19 de causar impactos devastadores em comunidades remotas: o garoto, com sintomas de gripe, viajou para o distante hospital da capital do estado de Roraima para obter assistência médica. No entanto, seu diagnóstico foi atrasado e complicações respiratórias prévias comuns entre os Yanomami e outras populações indígenas (por exemplo, tuberculose pulmonar e infecções agudas do trato respiratório inferior)<sup>9</sup> podem acarretar maior risco de morte para os casos de COVID-19. Adolescentes em países industrializados apresentaram risco mínimo de morte por COVID-19.<sup>10</sup>

As populações indígenas enfrentam uma vulnerabilidade única ao COVID-19 por várias razões. Além das condições respiratórias e outras condições de saúde que aumentam o risco de mortalidade por COVID-19, as comunidades indígenas geralmente não têm acesso a água potável, sabão, equipamento de proteção individual e saneamento público.<sup>11</sup> Os serviços médicos locais são subfinanciados para muitas comunidades indígenas urbanas e limitados ou inexistentes para comunidades rurais remotas. Hospitais e clínicas já carecem de capacidade para atender à alta demanda de testes e tratamento com COVID-19 na população em geral, sem falar nas comunidades indígenas localizadas mais distantes<sup>12</sup>, que frequentemente sofrem estigma ou discriminação. Viagens longas para hospitais ou clínicas regionais acarretam risco adicional de transmissão de vírus em transporte público lotado ou em outras rotas de viagem comumente usadas. A incapacidade de pagar por serviços médicos dificulta ainda mais o acesso quando não é coberta por planos de seguro do governo.

As normas locais também podem promover a transmissão de vírus. A coletividade é um ethos central que penetra vários aspectos da vida cotidiana em muitas culturas indígenas - desde a núcleo familiar, trabalho e produção comunitários, compartilhamento de alimentos e outras atividades em grupo. Essa coletividade é fundamental para a resiliência a longo prazo, mas pode impedir o cumprimento de medidas de distanciamento físico de curto prazo, em comparação com outras populações com culturas mais individualistas e lares nucleados.

Muitos grupos indígenas nas áreas rurais desenvolveram laços importantes com mercados e cidades, especialmente onde os meios tradicionais de subsistência estão desaparecendo. Esse acesso ao mercado, que geralmente é fornecido por estradas ou rios navegáveis, pode ser vital para segurança alimentar, acesso a medicamentos, benefícios de seguridade social e outros programas monetários patrocinados pelo governo, mas também pode facilitar a transmissão viral rápida de regiões mais densamente povoadas. Além disso, como várias indústrias e empresas que empregam comunidades indígenas foram fechadas durante a crise do COVID-19, a insegurança alimentar tornou-se um sério obstáculo à manutenção dos meios de subsistência.<sup>14</sup>

Os idosos tribais - muitos dos quais atuam como líderes tribais - correm um risco particularmente alto de fatalidade pelo COVID-19 devido à sua idade, certas comorbidades (como hipertensão ou diabetes), incapacidade e imunossenescência. Os anciãos são vitais para manter a

cultura e o idioma indígenas em meio à rápida globalização e, portanto, sua perda potencial pode resultar em extinção cultural ou linguística. Os idosos atuam como “bibliotecas ambulantes”, especialistas em idiomas, rituais e mitologia, modelos, professores e cuidadores em lares multigeracionais.

Por fim, como os povos indígenas geralmente habitam territórios protegidos, ricos em biodiversidade e recursos naturais, a extração intensiva de recursos (por exemplo, extração de madeira, mineração) representa uma ameaça constante aos meios de subsistência e vidas indígenas. Por exemplo, acredita-se que a mineração ilegal de ouro seja responsável por muitas mortes relacionadas à infecção pelos Yanomami no norte do Brasil e na Venezuela desde os anos 80, incluindo infecções fatais por sarampo e malária em 2019<sup>15,16</sup>. Os líderes yanomami agora alegam que sua primeira fatalidade por COVID-19 foi devido à exposição a garimpeiros infectados<sup>9</sup>. A extração ilegal de recursos também pode estar aumentando durante a pandemia devido a menor vigilância e fiscalização do governo, resultando em uma exploração ainda maior dos territórios indígenas e em confrontos fatais com as comunidades indígenas.<sup>11</sup>

A história trágica passada e a vulnerabilidade atual aumentaram o medo de devastação maciça por COVID-19 das comunidades indígenas ao redor do mundo.<sup>13,16,17</sup> Dadas as possíveis ameaças e obstáculos mencionados acima, muitas comunidades indígenas decidiram que a opção mais viável é restringir ou fechar suas próprias fronteiras, com ações voltadas principalmente para a prevenção da transmissão viral. Muitos grupos já restringiram suas fronteiras por conta própria, especialmente aqueles acostumados a bloqueios durante epidemias anteriores.<sup>18</sup> Por exemplo, em resposta ao COVID-19, o Cree de Waswanipi, no centro de Quebec, impede o acesso de não-residentes à comunidade e exige quarentena de 14 dias a partir do retorno de todos os residentes que haviam deixado a comunidade.<sup>17</sup> Os aborígenes mapones da península do Cabo York, na Austrália, promulgaram restrições autoimpostas de viagem mais severas, incluindo a proibição de todos os visitantes e a negação do acesso de retorno aos residentes que saem temporariamente.<sup>18</sup> Centenas de comunidades indígenas no Brasil, Peru, Colômbia e Equador bloquearam suas fronteiras da mesma forma, **incluindo os horticultores Shuar do Equador**<sup>19</sup>. **O Peru e Equador** têm as maiores taxas oficiais de infecção por capital da América Latina.<sup>20</sup> Outras medidas para isolar e proteger os indivíduos mais vulneráveis estão sendo propostas e discutidas ativamente.<sup>21</sup>

## Prevenção da propagação da pandemia nas planícies da Bolívia, Departamento de Beni

Os Tsimane da Bolívia estão espalhados por mais de 100 aldeias, muitas das quais localizadas ao longo dos rios Maniqui ou Quiquibey, ou nas regiões próximas de florestas. O tamanho da população é de ~ 16.000 indivíduos, com ~ 4% acima dos 60 anos de idade. Os tsimane produzem quase todos os seus próprios alimentos (> 90% de calorias na dieta)<sup>22</sup> e não têm acesso a água corrente ou saneamento. Eles experimentam alta carga infecciosa de diversos patógenos.<sup>23-25</sup> Muita morbimortalidade é causada por infecções, principalmente respiratórias. A tuberculose pulmonar permanece disseminada e a bronquiectasia é muito comum. A expectativa de vida dos Tsimane ao nascer era abaixo de 40 anos até o final do século XX.<sup>26</sup> Desde a década de 1970, as estradas aumentaram o acesso de algumas comunidades às cidades, e o aumento da disponibilidade de água motorizada e transporte terrestre na última década facilitou viagens mais frequentes às cidades, particularmente San Borja (população ~ 45.000). As instalações médicas são limitadas para Tsimane: uma clínica patrocinada por uma missão localizada nos arredores de San Borja fornece alguns cuidados, um hospital em San Borja fornece

atenção básica e cirurgias de rotina por médicos de clínica geral e postos de saúde rudimentares espalhados por todo o território de Tsimane. Atenção médica de especialistas requer transporte para grandes cidades, incluindo a capital Beni de Trinidad (~6-8 horas por estrada a partir de San Borja). Tsimane, portanto, representa uma população altamente vulnerável ao COVID-19, com opções limitadas de tratamento.

O Projeto Tsimane de Saúde e História da Vida (THLHP) trabalha com as comunidades de Tsimane desde 2002, estudando saúde e envelhecimento e, ao mesmo tempo, prestando assistência médica primária e vigilância biomédica.<sup>27,28</sup> Abaixo, fornecemos uma visão geral de nossa experiência de trabalho com o governo e as comunidades de Tsimane e com autoridades governamentais e de saúde locais no município de San Borja para ajudar a impedir que o SARS-CoV-2 alcance as comunidades de Tsimane.

Em geral, nossa abordagem no desenvolvimento de uma estratégia COVID-19 é baseada em dois princípios. A primeira é que medidas preventivas anteriores à infecção em massa podem reduzir bastante a carga de morbimortalidade. A segunda é que qualquer plano eficaz deve ser um esforço colaborativo entre todas as partes interessadas e deve envolver as populações indígenas no processo de decisão. Nós dividimos o plano em duas fases: **Fase I**, em que SARS-CoV-2 está se espalhando rapidamente na Bolívia, mas antes de serem confirmados casos no Departamento de Beni; e **Fase II**, a situação atual, à medida que a pandemia se espalha para a região em que os Tsimane vivem (veja a Tabela 1).

## Fase I: conscientização e prevenção

**Coordenação com liderança tribal representando populações indígenas.** A população de Tsimane possui dois conselhos de governo, o *Gran Consejo Tsimane* e o *Consejo Regional de Tsimane y Mosenet*. Acordos formais de longa data e boa vontade entre o THLHP e esses conselhos governamentais para conduzir pesquisas e fornecer atendimento primário de saúde às aldeias de Tsimane, ajudam a estabelecer confiança e facilitam a colaboração mútua para planejar e executar a resposta de prevenção (ver Apêndice 1).

**Provisionamento de informações.** Nossa equipe inclui 10 tsimane, todos bilíngues nos idiomas tsimane e espanhol. O primeiro passo foi educar nossa equipe, bem como o secretário de saúde do Gran Consejo sobre o SARS-CoV-2 (por exemplo, sobre sua origem, transmissão, sintomas) e os obstáculos à obtenção de tratamento eficaz. Três médicos e diretores de projeto do THLHP trabalharam com os membros da equipe de Tsimane para traduzir e adaptar os cartazes informativos dos Centros de Controle de Doenças dos EUA no idioma Tsimane.<sup>29</sup> Como atualmente não há casos conhecidos ou suspeitos na população de Tsimane, e o transporte foi limitado pelo governo boliviano, a equipe e os membros do Gran Consejo - todos assintomáticos para qualquer COVID-19 ou sintomas de gripe por pelo menos duas semanas - viajaram de motocicleta para ~ 60 aldeias para realizar reuniões da comunidade, a partir de 25 de março de 2020 (Figura 1). Esses encontros tiveram dois objetivos: informar os membros da comunidade sobre o COVID-19, e estimular a discussão de possíveis respostas preventivas (anexos 2 e 3). As apresentações incluíam informações sobre como o SARS-CoV-2 está se espalhando pelo mundo, o período de incubação e os riscos de contágio, a natureza frequentemente assintomática do vírus, as vulnerabilidades únicas dos idosos e aqueles com outras condições de saúde, a falta de uma vacina e os tratamentos disponíveis, e o papel da quarentena na prevenção da transmissão de vírus. Desafios de

certas práticas tradicionais, como o compartilhamento comunitário de *shocdye'*, ou cerveja de mandioca fermentada, também foram discutidos. Também se discutiu como o SARS-CoV-2 poderia se espalhar pela população de Tsimane por meio de interações de mercado e outros encontros com pessoas de fora.

**Tomada de decisão coletiva.** Como a maioria das outras populações indígenas, os Tsimane têm experiência com epidemias locais de doenças transmissíveis.<sup>26</sup> Tsimane em todas as aldeias visitadas rapidamente reconheceram os riscos de doenças e suas próprias vulnerabilidades. Historicamente, a resposta tradicional de Tsimane às epidemias era fugir e isolarem-se profundamente em seus territórios, longe dos forasteiros. Conforme observado em um número crescente de populações indígenas<sup>17,19</sup>, o consenso de toda a população de Tsimane é que o *isolamento coletivo* é a estratégia mais viável para minimizar a exposição ao COVID-19 até que vacinas ou tratamentos se tornem disponíveis.

Discussões animadas e bidirecionais durante as reuniões da comunidade focadas em como obter melhor isolamento coletivo. Um elemento importante foi impedir que *napo* (ou seja, pessoas de fora de Tsimane) entrassem no território de Tsimane e em cada aldeia. As aldeias organizaram grupos de voluntários para construir e proteger os bloqueios físicos contra a entrada. Outro elemento importante foi regular as interações dos moradores com os não residentes. A maioria das reuniões resultou em consenso em nível de vila de que ninguém deveria deixar o território e ir para uma área com risco de doença, a menos que houvesse uma emergência. Também houve acordo quanto à necessidade de uma quarentena de 14 dias em vários pontos-chave de entrada no território de Tsimane para qualquer morador que deixar e depois retornar à vila. A noção de quarentena foi considerada semelhante a várias práticas tradicionais, como o isolamento e a proteção das puérperas e de seus recém-nascidos. Muita discussão se concentrou na necessidade de colocar também indivíduos em quarentena que apresentassem sintomas e, em particular, a construção de cabanas a partir de materiais locais para alojamentos em quarentena. Também houve muita discussão sobre como proteger os idosos, especialmente aqueles com deficiência. Na maioria das comunidades, as discussões foram concluídas com um ato formal de reunião que os participantes assinaram ou receberam impressões digitais, representando os acordos coletivos feitos durante a reunião. Esses atos constituem prova formal para as autoridades governamentais sobre o processo coletivo de tomada de decisão.

As reuniões nas aldeias também resultaram em pedidos dos membros da comunidade para obter assistência no isolamento coletivo. Eles incluíam: 1) sabão e sal para complementar os alimentos que Tsimane produz localmente, 2) remédio suficiente para doenças comuns, para que Tsimane possa evitar sair de seu território para procurar atendimento médico, 3) suprimentos para a quarentena (por exemplo, rede de mosquitos e utensílios de alimentação) e 4) assistência **com materiais para fazer barreiras** (por exemplo, fechaduras e correntes) para proteger as barricadas físicas que foram criadas recentemente para alcançar o isolamento da vila.

As decisões dessas reuniões formaram a base do plano de prevenção para todas as aldeias.

**Coordenação com o governo regional e autoridades de saúde pública.** Um elemento crítico da Fase I foi a coordenação com a polícia local e as autoridades militares que impõem a quarentena ordenada pelo governo nacional (por exemplo, proibição interprovincial de viagens), o hospital local e a rede de resposta COVID-19, o governador de Beni e os representantes de Tsimane na Assembleia Nacional. Isso permitiu à nossa equipe receber permissões aprovadas pelo governo para (a) viajar rapidamente para as comunidades de Tsimane para realizar reuniões e (b) transportar médicos, medicamentos e



Equipamentos de Proteção Individual (EPI) para o território de Tsimane de La Paz e Santa Cruz. Os atos assinados na reunião da comunidade foram compartilhados com as autoridades na busca de assistência alimentar e na aplicação do isolamento coletivo.

O governo regional de Beni doou alguns suprimentos de comida diretamente para as aldeias de Tsimane. Nossa equipe está coordenando com o escritório do Governador de Beni para aumentar sua distribuição de alimentos com a compra de sabão e sal para cada aldeia, conforme solicitado nas reuniões da comunidade. Também estamos equipando cada aldeia que constrói os próprios alojamentos em quarentena com redes mosquiteiras e utensílios para comer, conforme solicitado pelos moradores, **também com** fechaduras e correntes, quando **for** necessário.

**Compra de equipamento de proteção individual (EPI) para distribuição local.** Como em grande parte do mundo, há uma escassez de EPI na Bolívia. No momento, estamos comprando máscaras, óculos e luvas N95 para doar ao hospital local de San Borja, profissionais de saúde e pessoal da THLHP. Máscaras e luvas cirúrgicas também serão doadas a cada aldeia, conforme necessário. A escassez inevitável pode exigir técnicas de 'guerrilha' das melhores práticas para reutilização segura dos EPI. Também será fornecido treinamento sobre o uso apropriado de EPI com base nas diretrizes da OMS.

**Prestação de cuidados médicos para pacientes não-COVID-19 no território de Tsimane.** Uma das necessidades mais prementes para a realização do isolamento coletivo é o fornecimento de assistência médica a indivíduos com outras doenças além do COVID-19. Devido à natureza do ambiente e à falta de infraestrutura de saúde pública, os Tsimane sofrem de inúmeras doenças infecciosas, incluindo parasitas intestinais, doenças diarréicas e doenças respiratórias. Essas infecções geralmente exigem que as pessoas procurem tratamento médico no hospital San Borja e / ou comprem medicamentos nas farmácias de San Borja. Na medida do possível, nosso objetivo é que a maioria dos cuidados médicos seja prestada nos cinco postos de saúde rurais apoiados pelo governo, com um médico assistente de atendimento primário, em um esforço colaborativo entre a equipe e os médicos pagos pelo governo, para que os moradores não precisem sair do território e correrem risco de infecção na cidade. Também estamos adquirindo medicamentos em antecipação à Fase II, quando as viagens para e do território provavelmente incorrerão em maior riscos ou serão impossíveis devido ao mau tempo.

**Resumo da Fase I.** Antes de iniciar a Fase I, a maioria dos Tsimane tinha pouco conhecimento sobre o risco de COVID-19. Agora, eles estão ativamente envolvidos no planejamento para impedir e conter sua propagação em suas comunidades. Esperamos que esses primeiros passos ajudem na preparação para a muito mais desafiadora Fase II.

## **Fase II: contenção e gerenciamento de pacientes COVID-19**

A fase II começou quando os primeiros casos de COVID-19 foram diagnosticados e confirmados na região de Beni (20 de abril de 2020), embora, por escrito, ainda não tenham sido confirmados casos em San Borja, município mais próximo das comunidades Tsimane. Dado o risco de espalhar-se o COVID-19 por meio de viagens, durante a Fase II, nossa equipe principal parou de visitar as aldeias de Tsimane. Em vez disso, usamos nossa estação de pesquisa THLHP em San Borja como base de operações. A partir dessa base, o pessoal da THLHP conduzirá o rastreamento de contatos em comunidades com casos



suspeitos e confirmados de COVID-19, utilizando a estação de rádio Tsimane (capaz de atingir a maioria das aldeias Tsimane) e outros modos de comunicação (por exemplo, rádio de ondas curtas e telefone celular). Além disso, pacientes de qualquer comunidade podem visitar a base para ajudar a coordenar o tratamento de problemas médicos que não sejam o COVID-19. Por fim, nossa equipe continuará fornecendo informações atualizadas da Fase I e ajudando a coordenar as respostas do governo local e da saúde pública no território de Tsimane.

**Relato de caso para a população de Tsimane.** Através da estação de rádio de Tsimane, forneceremos instruções diárias e atualizações sobre casos confirmados e suspeitos de COVID-19 em cada aldeia. Começamos fornecendo informações sobre novos casos e mortes na Bolívia. Quando o COVID-19 for detectado na região de Tsimane, esse conjunto de informações será mais detalhado e incluirá sugestões de respostas estratégicas. Além da estação de rádio Tsimane, nosso escritório em San Borja se comunicará com as comunidades distantes de Tsimane por rádio amador bidirecional e com as comunidades próximas por telefone celular.

**Relato de caso às autoridades locais.** Tsimane poderá utilizar nossa equipe de escritório para relatar casos suspeitos em suas aldeias. Os membros da equipe que falam Tsimane estarão disponíveis para receber informações sobre casos suspeitos das aldeias por telefone, rádio ou boca a boca. Esses casos, que podem não ser conhecidos pelas autoridades de saúde locais, devido ao seu afastamento, serão relatados às autoridades da rede de resposta boliviana COVID-19 para investigação, possíveis testes e tratamento.

**Vincule casos suspeitos e confirmados de COVID-19 ao sistema de informações geográficas (SIG) / banco de dados do censo.** A THLHP coletou dados da lista de famílias e posicionamento global para a maioria das famílias nas ~ 100 comunidades de Tsimane. Vincularemos relatórios sobre casos confirmados e suspeitos de COVID-19 a esses dados GIS para rastrear a disseminação de vírus e os possíveis centros de infecção. Essas informações serão usadas para coordenar as respostas de isolamento entre as comunidades afetadas e não afetadas, tomando cuidado para não estigmatizar indivíduos ou famílias afetadas pelo COVID-19; a estigmatização prejudicou os esforços do Ebola na África Subsaariana<sup>30,31</sup> e também o tratamento do HIV nos EUA.<sup>32</sup> Para reduzir a estigmatização de casos suspeitos ou confirmados de COVID-19, enfatizaremos a inclusão e a solidariedade com os casos de COVID-19 em mensagens de rádio e outras comunicações. Eles enfatizam que alguém é capaz de ser infectado, que uma vez que um indivíduo se recupera e fica sem sintomas por duas semanas, o risco de contágio é muito baixo e que somente com o apoio da própria comunidade, ela pode ser melhor protegida. Apelações semelhantes de líderes comunitários podem reforçar e legitimar ainda mais essas declarações.

**Coordene as respostas de isolamento nas comunidades afetadas e não afetadas.** Utilizando dados GIS e acompanhando casos suspeitos, utilizaremos todas as modalidades de comunicação para ajudar as comunidades a responder à disseminação do SARS-CoV-2.

A suspeita ou confirmação de casos de COVID-19 em uma comunidade desencadeará medidas de distanciamento físico em nível familiar e individual e quarentena ou isolamento. Como muitas

famílias Tsimane têm jardins hortícolas distantes e podem construir casas rudimentares com materiais florestais, é possível que cada família saia da vila e se auto isole de outras famílias. Para famílias sem casos suspeitos ou confirmados, esse auto isolamento pode ser uma resposta preferida a infecções em ou perto de aglomerados residenciais. Durante as reuniões da Fase I, sugerimos que as famílias se preparassem para esse isolamento, principalmente se membros idosos estivessem presentes, e abordamos estratégias de atendimento e isolamento dos casos COVID-19. Apoiaremos essas famílias com conselhos detalhados, materiais impressos cultural e linguisticamente específicos e rádio sobre como usar o EPI e colocar em quarentena os membros da família que apresentem sintomas.<sup>29</sup>

Para aldeias sem casos suspeitos ou confirmados, será importante restringir a visita de e para outras aldeias. Essas aldeias também serão aconselhadas a se preparar para o isolamento em nível familiar em casas secundárias.

**Teste e rastreamento de contato.** Um sistema para teste rápido local de casos suspeitos de COVID-19 representa uma ferramenta crítica na contenção da disseminação viral. Estamos buscando ativamente testes moleculares no ponto de atendimento para ajudar a confirmar os diagnósticos. No contexto de isolamento coletivo no qual a maioria dos moradores não está deixando suas comunidades, é possível localizar e rastrear contatos dos membros da família. Um esforço coordenado entre nossa equipe e funcionários de saúde do governo responsáveis por testes, processamento local adequado de amostras, nosso censo atualizado da aldeia e rastreadores de contato que falam Tsimane (localizados em nossa base e nas comunidades, para evitar viagens entre a cidade e as comunidades), pode conter surtos de doenças antes que se espalhem para outras aldeias. O desenvolvimento deste plano ainda está em andamento.

**Gerenciamento de pacientes.** Ao contrário de muitas outras doenças infecciosas, o tratamento baseado em evidências para SARS-COVID-2 ainda está sob investigação em todo o mundo. Medidas de suporte eficazes incluem oxigênio suplementar, hidratação e a capacidade de intubar e ventilar mecanicamente, se necessário. Pode ser necessário o uso de tratamento antibacteriano para possível superinfecção bacteriana. Com uma mortalidade de 50 a 80% para pacientes intubados em países industrializados<sup>33</sup>, é provável que a intubação seja inútil nesse cenário sem o apoio de especialistas. Os riscos de hospitalização incluem a exposição a outros pacientes com COVID-19 e pessoal potencialmente infectado do hospital a um paciente que chega de Tsimane e parentes acompanhantes, que têm o potencial de trazer o vírus de volta para suas comunidades em seu retorno. Atualmente, para todos os pacientes, exceto os mais severamente sintomáticos, as desvantagens de ser hospitalizado para o paciente e para a comunidade provavelmente superam os benefícios.

Como estratégia principal para gerenciar casos de COVID-19 com saturação inadequada de oxigênio (avaliada usando oxímetros de pulso disponíveis), o oxigênio suplementar tem o potencial de ser administrado fora do hospital nos cinco postos de saúde mencionados acima. O fornecimento de oxigênio por 24 horas pode ser fornecido por uma cânula nasal com reservatório de oxigênio em conjunto com concentradores de oxigênio. Isso permitiria que o tratamento efetivo, com pouca intubação, fosse fornecido próximo à comunidade do paciente em um espaço muito menos congestionado. Para pacientes que não necessitam de oxigênio, o isolamento dentro da aldeia pode ser realizado. Conversas sobre estratégias de tratamento exigirão o envolvimento direto de líderes comunitários e familiares para reduzir as chances de os pacientes recusarem o tratamento. Para

qualquer recusa, o isolamento será crítico, combinado com o alívio dos sintomas com monitoramento de analgésicos e hipóxia.

No futuro, se tratamentos eficazes com COVID-19, como agentes antivirais e imunomoduladores intravenosos, forem eficazes e estiverem disponíveis, o manejo hospitalar regional poderá ajudar a prevenir a progressão da doença e mitigar a mortalidade.

## Adaptação de estratégias de prevenção a outras populações indígenas

Os riscos, desafios e opções para respostas estratégicas enfrentadas pelas comunidades indígenas compartilham muitos aspectos daqueles enfrentados pelas populações em todo o mundo, devido às características do próprio COVID-19. No entanto, existem algumas circunstâncias comuns entre muitos povos indígenas, aborígenes e tribais que apresentam riscos e oportunidades diferentes.

Com relação ao risco, as áreas urbanas severamente afetadas em todo o mundo provavelmente esgotam suprimentos médicos, instalações de laboratório e leitos hospitalares, deixando pouco para as populações indígenas. Questões semelhantes para minorias e pobres em recursos têm o potencial de agravar as disparidades na saúde<sup>24</sup>. Ao mesmo tempo, fontes únicas de resiliência podem ser aproveitadas para evitar a mortalidade generalizada nas comunidades indígenas. A capacidade de produzir alimentos de subsistência diariamente é vital para o isolamento coletivo. Os direitos à terra e ao seu uso pelas comunidades indígenas são, portanto, críticos para garantir a dependência de atividades relacionadas à subsistência. A soberania tribal reconhecida pelo governo também é uma vantagem para muitas populações indígenas. Isso pode facilitar a tomada de decisões da comunidade que podem ser aplicadas pelo governo e pelas autoridades tribais, incluindo a restrição de movimentos dentro e fora do território. Normas culturais de fortes laços familiares e reuniões comunitárias, como as que discutimos, são um local comum para a tomada de decisões coletivas. Por fim, a baixa densidade populacional facilita o isolamento e o rastreamento de contatos. Essas fontes de resiliência podem ser aplicadas ao desenvolvimento de estratégias para prevenção e mitigação da mortalidade por COVID-19 em populações indígenas.

A Tabela 1 fornece uma estrutura geral para os elementos essenciais, estratégias de implementação e considerações do contexto local para planos de prevenção e contenção em outras populações indígenas. Idealmente, as fases I e II ocorrem sequencialmente, mas essas podem precisar ser avançadas simultaneamente se o COVID-19 já estiver presente localmente. Muitos outros detalhes provavelmente precisarão ser adaptados às circunstâncias locais em outros ambientes tribais. A avaliação do conhecimento e da educação local sobre o COVID-19 é fundamental. Outro elemento crítico é a promoção e o respeito à tomada ativa de decisões coletivas pelas próprias comunidades, envolvendo todas as partes interessadas relevantes, incluindo líderes e membros da comunidade, governo local e autoridades de saúde pública e quaisquer outras entidades envolvidas no gerenciamento da resposta à pandemia. Se as comunidades decidirem isolar coletivamente, poderá ser necessário apoio econômico, médico e logístico para viabilizar o isolamento. É necessário um plano para o tratamento de doenças crônicas ou agudas que não sejam o COVID-19 para garantir que os casos emergentes sejam tratados, mantendo o plano de isolamento.

Para a Fase II, devem existir estratégias de comunicação para informar as pessoas sobre onde os casos foram suspeitos e / ou confirmados, sem criar estigma que possa impedir os indivíduos de procurar atendimento médico<sup>25</sup> (para versões em espanhol desses documentos, consulte o Apêndice 4-6). Deve haver estratégias para impedir a propagação do vírus para áreas e famílias não afetadas. O distanciamento físico pode ser aplicado nos níveis da vila, da casa e do indivíduo, à medida que as circunstâncias mudam, e adaptado para contextos rurais e culturais específicos. Fontes externas podem

fornecer assistência com o fornecimento de EPI aos profissionais de saúde locais e auxiliado na quarentena e isolamento dos pacientes. Testagem e rastreamento de contatos facilitarão bastante a contenção de casos, à medida que testes confiáveis e portáteis forem disponibilizados. Se o suporte de oxigênio continuar sendo o tratamento mais eficaz, isso pode ser fornecido por estratégias inovadoras nos postos de saúde locais, conforme descrito acima. O apoio da telemedicina de especialistas no país ou distantes pode ser fornecido para ajudar os profissionais de saúde regionais, em particular quanto mais se sabe sobre terapias potenciais e melhores práticas de suporte ao paciente, à medida que o COVID-19 se espalha globalmente. Se as terapias intravenosas forem eficazes, como agentes antivirais e / ou imunomoduladores, as oportunidades de hospitalização se tornarão importantes.

Outros aspectos da Fase II também podem precisar se adaptar às condições locais. A medida em que uma população indígena dependa de bens comprados nos mercados pode exigir mudanças no plano de isolamento. Uma solução possível para comunidades indígenas dependentes do mercado é instituir *mercados controlados* próximos, mas fora das aldeias, para evitar visitas às cidades ou para impedir que comerciantes externos entrem nas comunidades. Atualmente, esse processo está sendo implementado entre os Mosenen, um grupo indígena mais aculturado, cultural e linguisticamente semelhante ao Tsimane. Isso envolve fazer acordos com comerciantes confiáveis em relação aos bens que os moradores desejam vender e comprar e sobre os controles a serem implementados. Em dias selecionados, as mercadorias podem ser transportadas para áreas designadas, com vendedores e compradores mantendo distância física e usando EPI.

## Conclusão: Agir agora para evitar desastres

Nosso objetivo para esta contribuição é promover estratégias gerais e adaptáveis para mitigar os efeitos da pandemia SARS-CoV-2 nas populações indígenas. Supomos que existem muitos povos indígenas que não se beneficiaram da preparação avançada para esta pandemia e cujas necessidades podem ser excluídas dos planos regionais devido à falta de recursos, apoio logístico e cultural. Incentivamos uma discussão mais ampla e imediata das estratégias de mitigação entre várias partes interessadas. Sites como o COVID-19 das Nações Unidas e os Povos Indígenas (<https://www.un.org/development/desa/indhnicpeoples/covid-19.html>) poderiam funcionar como um centro de informações relevantes e atualizadas sobre planos de ação em todo o mundo. A hora de agir é agora, antes que o COVID-19 crie devastação nas populações indígenas.

### **Contribuintes.**

DER, JCA, RQG, MGC, RMM e LMM foram fundamentais na organização e implementação do plano COVID-19 no território de Tsimane. HSK e MDG conceberam o artigo. MDG, HSK, JS, DER, GST e DEM redigiram o documento. Todos os autores contribuíram com ideias, comentários e revisaram o artigo. Todos os autores aprovaram a versão final.

**Declaração de interesses.** Todos os autores declaram não ter interesses concorrentes.

**Reconhecimentos.** O THLHP é financiado pelo **Instituto Nacional de Saúde** (RF1AG054442) e **Fundação Nacional de Ciências** (1748282) **dos EUA**. O JS também reconhece o financiamento do IAST da Agência

Nacional Francesa de Pesquisa (ANR) no âmbito do programa Investimentos para o Futuro (Investissements d'Avenir) (ANR-17-EURE-0010). Os financiadores não influenciaram nenhum aspecto de nosso plano COVID-19 ou na decisão de enviar. Agradecemos à equipe do THLHP por seus incansáveis esforços de prevenção, especialmente Arnulfo Cari Ista, Bernabe Nate Añez, Bacilio Vie Tayo, Jesus Bani Cuata, Erwin Gutierrez Cayuba, Alberto Vie Tayo, Cristian Alameda Claros, Lorgio Canchi Tayo, Marcos Renard Vasquez e Genaro Roca. Moya. Também agradecemos à equipe de estudo da Horus pela assistência no desenvolvimento do protocolo. Agradecemos a Matthew Schwartz por traduzir o artigo original para o português.

**Tabela 1.** Elementos essenciais, implementação e considerações locais para uma Plano de Prevenção e Contenção COVID-19

| fase                           | Elementos essenciais da                                                                                                 | Implementação                                                                                                                                                                  | Considerações locais                                                                                                                                                                               |
|--------------------------------|-------------------------------------------------------------------------------------------------------------------------|--------------------------------------------------------------------------------------------------------------------------------------------------------------------------------|----------------------------------------------------------------------------------------------------------------------------------------------------------------------------------------------------|
| <b>Fase 1</b>                  | <b>Coordenação Líderes tribais</b>                                                                                      | Discussões sobre planos existentes, Avaliação da conscientização local, Solicitação de assistência de fontes não tribais                                                       | Existe representação tribal centralizada ou estrutura governamental dispersa? Atitudes em relação aos não indígenas? Relacionamento e confiança com governos regionais, ONGs relacionadas à saúde? |
|                                | <b>Educação / sensibilização da</b>                                                                                     | comunidade-reuniões em língua nativa, folhetos, programas de rádio, “Whatsapp” & media sociais                                                                                 | modalidades de comunicação disponíveis, o conhecimento existente sobre COVID-19, a compreensão da transmissão da doença, língua (s) falada                                                         |
|                                | <b>decisão coletiva Fazendo</b>                                                                                         | reuniões comunitárias, Apreciação de isolamento coletivo, formação de comitês para impor decisões, documentação de decisões coletivas                                          | estatuto legal de território tribal e capacidade de práticas coletivamente isolar, culturais sobre a tomada de decisão, capacidade e direitos de uso para produzir próprio alimento                |
|                                | <b>coordenação com governos regionais e autoridades de saúde pública</b>                                                | compreensão da estratégias de gerenciamento Covid-19 existentes, Assistência necessária de fontes não tribais, Comunicação e aplicação de decisões de isolamento da comunidade | Existe um plano de contenção existente? Existe uma política direcionada para as comunidades indígenas, o potencial papel das ONGs no plano, a estrutura de processo de                             |
|                                | <b>Compra decisão e treinamento em uso de EPI</b>                                                                       | Compreender oferta e escassez existente, fornecimento suprimentos, terceirização de fundos para a compra, distribuição às comunidades, vídeos instrutivos                      | Há estoques locais / nacionais? Os EPI estão disponíveis localmente, os profissionais de saúde são treinados em seu uso                                                                            |
|                                | <b>Assistência médica no território a doenças que não sejam COVID-19 para evitar a exposição no ambiente hospitalar</b> | Postos de saúde, equipe médica itinerante, suporte                                                                                                                             | médico Infraestrutura médica local, disponibilidade de medicamentos e equipamentos de diagnóstico, morbidades comuns e seus sintomas se sobrepõem à COVID-19                                       |
| <b>Transição: Fase 1 a 2ao</b> | <b>Suporte isolamento</b>                                                                                               | Cadeia de suprimentos segura de medicamentos, testes e necessidades básicas, bloqueios e fiscalização                                                                          | Autonomia territorial, autonomia de subsistência versus necessidade de mercados, transporte e acesso à comunidade, Cadeias de suprimentos implementadas?                                           |
| <b>Fase 2</b>                  | <b>Relato de casos à população indígena</b>                                                                             | Rede de contatos em cada aldeia, grupos de mídia social, telefone celular, rádio amador, suporte financeiro para comunicação                                                   | Disponibilidade de modalidades de comunicação, natureza das interações dentro e entre comunidades                                                                                                  |
|                                | <b>Relato de casos Comunicação às autoridades locais</b>                                                                | Comunicação com a equipe Covid local de resposta para investigar casos suspeitos                                                                                               | Infraestrutura local para investigação de casos, recursos humanos existentes,                                                                                                                      |

|                                                    |                                                                                                                                                                                                                        |                                                                                                                                                                   |
|----------------------------------------------------|------------------------------------------------------------------------------------------------------------------------------------------------------------------------------------------------------------------------|-------------------------------------------------------------------------------------------------------------------------------------------------------------------|
|                                                    |                                                                                                                                                                                                                        | confiança entre a população e as autoridades locais                                                                                                               |
| <b>Mapeamento de casos suspeitos e confirmados</b> | Gerar mapa de casos, famílias / comunidades afetadas, Ajustar o plano de contenção aos 'hot spots' locais                                                                                                              | Disponibilidade de censo e informações geográficas, fluidez da comunicação com as comunidades locais                                                              |
| <b>Coordenar respostas de isolamento</b>           | Rádio, telefone e comunicação pessoal para isolar as famílias de indivíduos afetados de outras famílias e isolar comunidades não afetadas das comunidades afetadas                                                     | Todas as considerações acima, distribuição geográfica de h propriedades e comunidades, obstáculos para o isolamento nos níveis individual, familiar e comunitário |
| <b>Teste e rastreamento de contatos</b>            | Investigue cada caso, como entrou na comunidade e teste todos os indivíduos potencialmente afetados                                                                                                                    | Disponibilidade de kits de teste, recursos humanos para investigação de casos, frequência de contatos entre famílias e com o mundo exterior                       |
| <b>Gerenciamento do paciente</b>                   | Isolamento de pacientes menos doentes, medição periódica de oxigênio no sangue de pacientes sintomáticos, suporte a oxigênio de alto fluxo, proning, antiviral e outros tratamentos à medida que se tornam disponíveis | Todas as considerações acima, alterando as melhores práticas e a disponibilidade de modalidades de tratamento                                                     |

**Figura 1.** (a, b) reuniões da comunidade Tsimane durante a Fase I; (c) Um bloqueio destinado a impedir que não-Tsimane entrem na comunidade Tsimane; (d) Entrega de sal e sabão a serem usados para ajudar na quarentena de casos suspeitos de COVID-19. Crédito da foto: equipe THLHP.



## Referências

1. <https://www.worldbank.org/en/topic/indigenouspeoples>. 2020 (accessed April 20, 2020).
2. <https://www.worldometers.info/coronavirus/countries-where-coronavirus-has-spread/>. (accessed April 30, 2020).
3. Gracey M, King M. Indigenous health part 1: determinants and disease patterns. *The Lancet* 2009; **374**(9683): 65-75.
4. La Ruche G, Tarantola A, Barboza P, Vaillant L, Gueguen J, Gastellu-Etchegorry M. The 2009 pandemic H1N1 influenza and indigenous populations of the Americas and the Pacific. *Eurosurveillance* 2009; **14**(42): 19366.
5. Lombardo U, Iriarte J, Hilbert L, Ruiz-Pérez J, Capriles JM, Veit H. Early Holocene crop cultivation and landscape modification in Amazonia. *Nature* 2020: 1-4.
6. Cook ND. Born to die: disease and New World conquest, 1492-1650: Cambridge University Press; 1998.
7. Mann CC. 1491: New revelations of the Americas before Columbus: Alfred a Knopf Incorporated; 2005.
8. Romero S. Checkpoints, curfews, airlifts: virus rips through Navajo nation. *New York Times*. 2020 April 10, 2020.
9. Phillips T. Covid-19 fears grow for indigenous South Americans as Yanomami teen tests positive. *Guardian*. 2020 April 8, 2020.
10. Sousa AO, Salem JI, Lee FK, et al. An epidemic of tuberculosis with a high rate of tuberculin anergy among a population previously unexposed to tuberculosis, the Yanomami Indians of the Brazilian Amazon. *Proceedings of the National Academy of Sciences* 1997; **94**(24): 13227-32.
11. Team CC-R. Severe Outcomes Among Patients with Coronavirus Disease 2019 (COVID-19) — United States, February 12–March 16, 2020, 2020.
12. Ferrante L, Fearnside PM. Protect Indigenous peoples from COVID-19. *Science* 2020; **368**(6488): 251.
13. Soares J. Brazil: Indigenous people in the Amazon brace for coronavirus. *dwcom*. 2020 April 6, 2020.
14. Wight A. Coronavirus 'could devastate' indigenous communities. *SciDevNet*. 2020 April 1, 2020.
15. Smith R. Measles outbreak threatens isolated Amazonian tribe. *CNN*. 2018 July 5, 2018.
16. Fraser B. Measles outbreak in the Americas. *The Lancet* 2018; **392**(10145): 373.
17. Coletta A, Traiano H. The world's indigenous peoples, with tragic history of disease, implore outsiders to keep coronavirus away. *Washington Post*. 2020 March 31, 2020.
18. Mounter B. Self-imposed coronavirus lockdown part of Cape York efforts to protect vulnerable communities. *ABC Far North*. 2020 March 23, 2020.

19. Collyns D, Cowie S, Parkin Daniels J, Phillips T. 'Coronavirus could wipe us out': indigenous South Americans blockade villages. *Guardian*. 2020 March 30, 2020.
20. León Cabrera JM, Kurmanaev A. Ecuador Gives Glimpse Into Pandemic's Impact on Latin America. *New York Times*. 2020 April 8, 2020.
21. Allam L. Indigenous elders ask to be evacuated from remote communities over coronavirus fears. *Guardian*. 2020 April 3, 2020.
22. Kraft TS, Stieglitz J, Trumble BC, Martin M, Kaplan H, Gurven M. Nutrition transition in 2 lowland Bolivian subsistence populations. *The American journal of clinical nutrition* 2018; **108**(6): 1183-95.
23. Blackwell AD, Trumble BC, Maldonado Suarez I, et al. Immune Function in Amazonian Horticulturalists. *Annals of Human Biology* 2016; **43**(4): 382-96.
24. Vasunilashorn S, Finch CE, Crimmins EM, et al. Inflammatory gene variants in the Tsimane, an indigenous Bolivian population with a high infectious load. *Biodemography and Social Biology* 2011; **57**(1): 33-52.
25. Dinkel KA, Costa ME, Kraft TS, et al. Relationship of sanitation, water boiling, and mosquito nets to health biomarkers in a rural subsistence population. *American Journal of Human Biology* 2020: e23356.
26. Gurven M, Kaplan H, Supa AZ. Mortality experience of Tsimane Amerindians of Bolivia: Regional variation and temporal trends. *American Journal of Human Biology* 2007; **19**(3): 376-98.
27. Gurven M, Stieglitz J, Trumble B, et al. The Tsimane Health and Life History Project: Integrating anthropology and biomedicine. *Evolutionary Anthropology: Issues, News, and Reviews* 2017; **26**(2): 54-73.
28. Kaplan H, Thompson RC, Trumble BC, et al. Coronary atherosclerosis in indigenous South American Tsimane: a cross-sectional cohort study. *Lancet* 2017; **389**(10080): 1730-9.
29. Prevention CfDca. Coronavirus Disease 2019 (COVID-19) Print Resources. 2020. <https://www.cdc.gov/coronavirus/2019-ncov/communication/print-resources.html>.
30. Barry SH, Richard PA. Cultural Contexts of Ebola in Northern Uganda. *Emerging Infectious Disease journal* 2003; **9**(10): 1242.
31. Reluga TC, Smith RA, Hughes DP. Dynamic and game theory of infectious disease stigmas. *Journal of Theoretical Biology* 2019; **476**: 95-107.
32. Lassaunière R, Frische A, Harboe ZB, et al. Evaluation of nine commercial SARS-CoV-2 immunoassays. *medRxiv* 2020: 2020.04.09.20056325.
33. Yang X, Yu Y, Xu J, et al. Clinical course and outcomes of critically ill patients with SARS-CoV-2 pneumonia in Wuhan, China: a single-centered, retrospective, observational study. *The Lancet Respiratory Medicine* 2020.
34. Board NTE. How to Save Black and Hispanic Lives in a Pandemic. *New York Times*. 2020 April 11, 2020.

## APÊNDICE SUPLEMENTAR

### CONTEÚDO

**1. Figura S1** (a, b) reuniões da comunidade Tsimane durante a Fase I; (c) Um bloqueio destinado a impedir que não-Tsimane entrem na comunidade Tsimane; (d) Entrega de sal e sabão a serem usados para auxiliar no isolamento de casos suspeitos de COVID-19. Crédito da foto: equipe THLHP.

### 2. Detalhes do Protocolo

2.1. Estrutura organizacional para colaborações locais para os esforços de prevenção de COVID-19 aos Tsimane (inglês).

2.2 Exemplo de roteiro da reunião da comunidade Tsimane durante a Fase I (inglês).

2.3 Exemplos de roteiros para mensagens de rádio durante a Fase I (inglês).

2.4 (Apêndice 2.1 em espanhol). Estrutura organizacional para colaborações locais para os esforços de prevenção de Tsimane COVID-19

2.5 (Apêndice 2.2 em espanhol). Exemplo de roteiro da reunião da comunidade Tsimane durante a Fase I (espanhol).

2.6 (Apêndice 2.3 em espanhol). Exemplos de roteiros para mensagens de rádio durante a Fase I (espanhol).

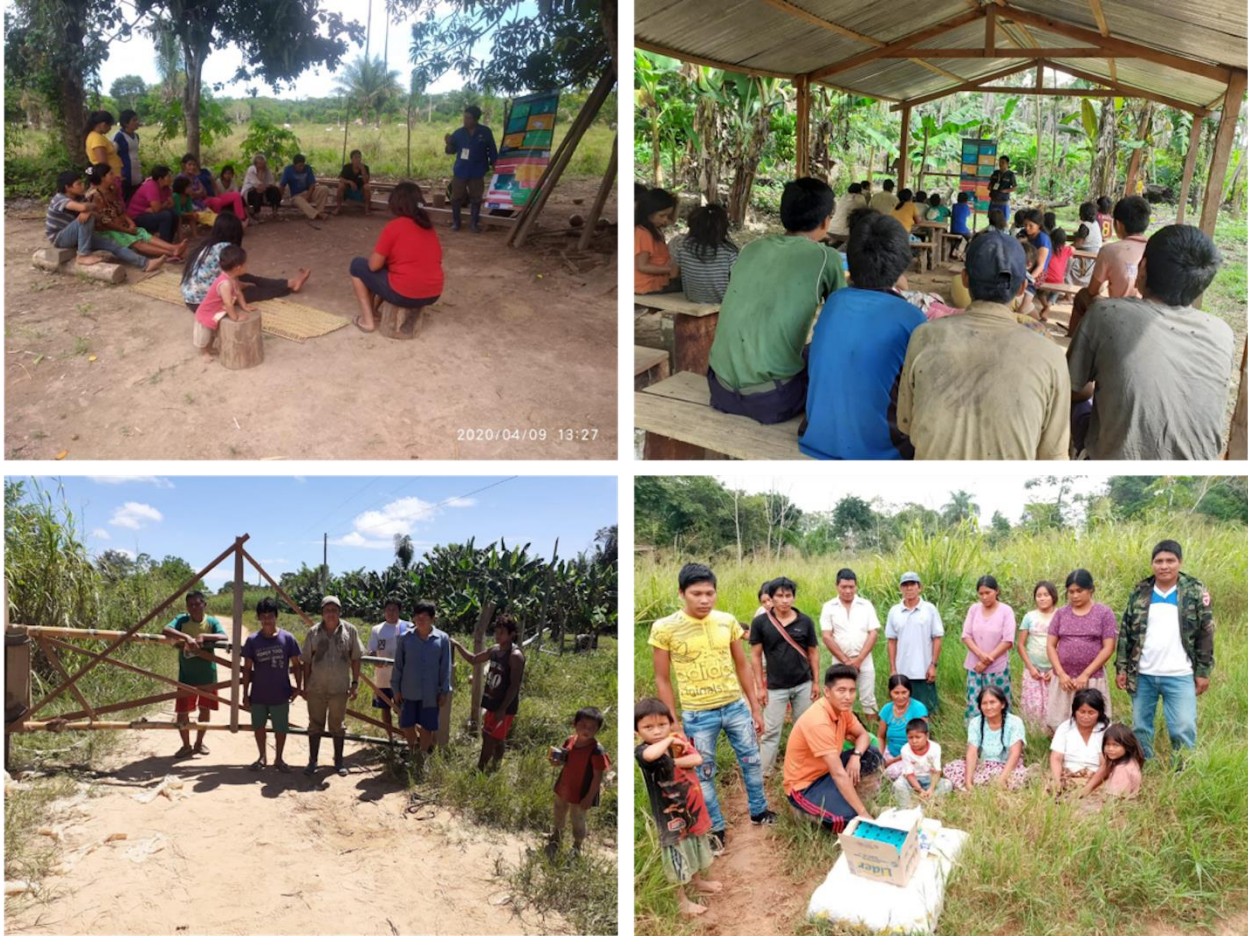

**Figura S1.** (a, b) reuniões da comunidade Tsimane durante a Fase I; (c) Um bloqueio destinado a impedir que não-Tsimane entrem na comunidade Tsimane; (d) Entrega de sal e sabão a serem usados para ajudar na quarentena de casos suspeitos de COVID-19. Crédito da foto: equipe THLHP.

**Apêndice 2.1.** Estrutura organizacional para colaborações locais para os esforços de prevenção de COVID-19 aos Tsimane

**INSTRUÇÕES PARA ESTRUTURA E FUNÇÕES DO COMITÊ LOCAL DE VIGILÂNCIA TSIMANE PARA A EPIDEMIA DE CORONAVIRUS**

**PARCEIROS DO PLANO DE VIGILÂNCIA DE CONTROLE DE CORONAVIRUS EM COMUNIDADES TSIMANE**

- TSIMANE GRAN CONSEJO TSIMANE, representado pelo Sr. Magim, Cayen.
- PROJETO TSIMANE DE SAÚDE E HISTÓRIA DA VIDA, representado pelos drs. Hillard Kaplan, Michael Gurven, Jonathan Stieglitz e Benjamin Trumble.
- ESTAÇÃO BIOLÓGICA DE BENI, representada pela Senhora Carola Vaca
- FUNDAÇÃO MÉDICA DE SOLIDARIEDADE (ILHAS CANÁRIAS), representada pelo Dr. Sergio Bejarano

## COMPOSIÇÃO DA EQUIPE DE VIGILÂNCIA

- a. Chefe da aldeia.
- b. Representante dos idosos.
- c. Representante das mulheres.
- d. Representante do Projeto Tsimane de Saúde e História da Vida.
- e. Representante do Gran Consejo Tsimane.

## FUNÇÕES DA EQUIPE DE VIGILÂNCIA

- a. Implementar regulamentos internos da comunidade para lidar com casos suspeitos.
- b. Direcionar a construção do ambiente de quarentena para contatos prováveis e casos suspeitos.
- c. Definir as condições de contato com um caso suspeito e contatos prováveis.
- d. Coordenar com os centros de saúde locais e a equipe médica móvel do projeto Tsimane para relatar casos e contatos.
- e. Realizar reuniões com a comunidade para relatar e coordenar atividades durante a epidemia.

## DEFINIÇÕES OPERACIONAIS

### **Definição de um caso suspeito.**

- Uma vez iniciada a epidemia, uma pessoa com tosse e febre, com ou sem problemas respiratórios e proveniente de uma área que já relatou casos confirmados de COVID-19 será considerada um caso suspeito.

### **Definição de contato provável.**

- Qualquer pessoa de uma zona epidêmica ativa do COVID-19.

## QUARENTENA

### **Quem entrará em quarentena?**

- Indivíduos que atendam à definição de um caso suspeito e contato provável.

### **Em que consiste a quarentena?**

- A quarentena consistirá na separação de casos suspeitos e contatos prováveis do resto da comunidade. Para isso, eles receberão um ambiente para descansar, assim como lhes serão dados utensílios (por exemplo, um prato, colher, copo) para que os membros da família possam lhes entregar a comida enquanto estão separados. Eles também receberão detergente para lavar as mãos, roupas e utensílios de cozinha.

## **Tempo de duração da quarentena**

- Os contatos em potencial deverão ser colocados em quarentena para observação por doze dias a fim de verificar se eles apresentam sintomas; se não tiverem sintomas, poderão se juntar à família e à comunidade. Os casos suspeitos deverão receber atenção médica (do centro de saúde mais próximo) e ficar em quarentena até que seus sintomas diminuam. Eles receberão os alimentos e medicamentos necessários durante a doença, além de avaliações diárias para ver a progressão da doença e a necessidade de transferência para centros de saúde mais especializados.

## **MATERIAL PARA CADA COMITÊ DE VIGILÂNCIA**

- a. Detergente, prato, colher e copo para casos suspeitos.
- b. Kit de primeiros socorros para a comunidade.
- c. Suprimentos necessários para a coordenação com os centros de saúde locais, para impedir que pacientes com doenças tratáveis de primeiro nível sigam para San Borja.

## **Apêndice 2.2.** Exemplo de roteiro da reunião da comunidade Tsimane durante a Fase I (inglês).

### **Introdução.**

Estamos em uma situação especial, pois temos uma doença chamada COVID-19. Essa doença começou na China em dezembro de 2019. Em seguida, se espalhou para vários países e continentes e, atualmente, está matando centenas de pessoas por dia em muitos países. Mais de 170.000 pessoas morreram em todo o mundo pelo COVID-19. O mais importante a ser mencionado é que a doença já está na Bolívia; Temos centenas de casos na Bolívia e é exatamente por isso que estamos tendo essa reunião.

### **O que é COVID-19 e coronavírus?**

COVID-19 é uma doença respiratória que pode ser contagiosa, como um resfriado. O COVID-19 é causado por um vírus chamado coronavírus. Atualmente, não há vacina ou medicamento para prevenir ou curar o COVID-19.

Existe um risco maior ao contrair a doença para pessoas com mais de 50 anos de idade, pessoas com doenças baseadas em diabetes, hipertensão, doença renal, doença cardíaca e pessoas imunossuprimidas, anêmicas e desnutridas.

### **Como se espalha o coronavírus?**

O vírus provavelmente começou em outro animal que não o ser humano, mas agora está se espalhando de pessoa para pessoa. Acredita-se que o vírus se espalhe principalmente entre pessoas que estão em contato próximo (a uma distância de um metro), através de gotículas que são produzidas quando uma

pessoa infectada tosse ou espirra. Também é possível que uma pessoa contraia COVID-19 tocando uma superfície ou objeto que tenha o vírus e, em seguida, tocando sua boca, nariz ou, possivelmente, seus olhos, pois, como foi demonstrado, uma pessoa pode tocar sua face mais de 100 vezes ao dia. Essas gotículas podem cair em pratos, copos ou outras coisas de plástico, metal ou madeira; neles, o vírus pode viver por pelo menos um dia e talvez mais. Assim, uma pessoa saudável pode ser infectada com o vírus ao tocar nessas coisas infectadas e colocar as mãos na boca.

É importante lavar as mãos com sabão antes de comer ou antes de colocar a mão na boca ou nos olhos.

### **Quais são os sintomas do COVID-19?**

Os pacientes com COVID-19 tiveram doença respiratória leve a grave com os seguintes sintomas:

- febre maior que 38 ° C
- tosse seca
- dificuldade em respirar
- Na circunstância de um caso ser complicado, pode ocorrer: pneumonia (infecção) nos dois pulmões, falha de um ou múltiplos órgãos, ou morte.

### **O que posso fazer para evitar esta doença?**

- Evite contato próximo com pessoas doentes.
- Evite tocar nos olhos, nariz e boca com as mãos não lavadas.
- Lave as mãos frequentemente com água e sabão por pelo menos 20 segundos. Se possível, você também pode usar um sanitizador para as mãos que contenha pelo menos 60% de álcool (se água e sabão não estiverem disponíveis).

### **O que devo fazer se eu me sentir doente?**

- Fique em casa para não infectar outras pessoas.
- Cubra o nariz e a boca com a dobra do cotovelo ou tecido descartável quando tossir ou espirrar e depois jogue-o fora.
- Limpe e desinfete objetos e superfícies tocados com frequência.

### **O que é quarentena?**

Quarentena é uma medida de isolamento social que serve para impedir a propagação da infecção por coronavírus.

### **Como a quarentena pode impedir a transmissão?**



Quando uma pessoa vem de uma área onde a epidemia foi confirmada, ela pode desenvolver a doença dentro de 6 a 10 dias. Solicita-se que essa pessoa fique isolada por 14 dias, para verificar se está infectada ou não. Se você tiver a infecção, deve permanecer em tratamento e isolado por até 30 dias. Se você não tiver a infecção, poderá se juntar à comunidade novamente. Dessa forma, impedimos que uma pessoa infectada entre na comunidade e a espalhe para outras pessoas.

### **Por que o isolamento é importante?**

- Porque ainda não há vacina para prevenir o coronavírus.
- Porque uma pessoa infectada, no início (nos primeiros 6 a 10 dias), pode não apresentar nenhum sintoma da doença, mas é altamente contagiosa.

**Apêndice 2.3.** Exemplos de roteiros para mensagens de rádio durante a Fase I (inglês).

#### ***Roteiro 1***

URGENTE: Coronavírus e COVID-19 chegaram à Bolívia.

A doença de coronavírus chegou à Bolívia. A doença veio originalmente da China e agora se espalhou para países de todo o mundo. A doença pode dizimar os pulmões, e nenhum tratamento foi encontrado ainda. Esta doença é muito perigosa e contagiosa. Muitos já morreram desta doença.

Começa com febre, tosse seca e dor de garganta. Sua garganta e seu peito estão apertados e você não consegue respirar. É perigoso para todas as pessoas: para crianças, jovens e idosos, mas é mais perigoso para aqueles com mais de 60 anos.

Esta doença é mais perigosa para quem já tem outras doenças, como tuberculose, diabetes, pressão alta, anemia, desnutrição e outras doenças nos pulmões. Portanto, nossa população de Tsimane está em alto risco.

Embora nossa população de Tsimane tenha sofrido doenças infecciosas no passado, essa doença é muito contagiosa, muito mais do que outras doenças que você possa ter experimentado ou ouvido falar, e mais letal uma vez infectado. Você pode pegá-la quando estiver perto de uma pessoa doente. A doença vive na saliva. Quando você fala, tosse ou espirra, emite essa saliva. Nessa saliva, existem gotículas muito pequenas que não podem ser vistas e o vírus vive lá. Se uma gotícula atingir seus olhos, nariz ou boca, você poderá pegar o vírus e a doença.

Da mesma forma, se a pessoa doente pega um prato, um copo ou qualquer outra coisa, a doença permanece nessas coisas. Portanto, pessoas saudáveis - quando cumprimentam a pessoa doente ou quando tocam as coisas que foram contaminadas pela pessoa doente com essas gotículas minúsculas - elas próprias podem pegar a doença.

Nos primeiros 6 a 10 dias, o coronavírus entra no seu corpo e você pode ficar doente por até três semanas, se não morrer mais cedo.

Você deve procurar ajuda: entre em contato com o chefe da comunidade, para que ele entre em contato com um membro do Tsimane Health and Life History Project (por exemplo, por telefone ou rádio) para receber ajuda.

## **Roteiro 2**

### **O que pode ser feito para evitar uma infecção por coronavírus?**

Se você conhece alguém que veio de um local onde há uma epidemia como Santa Cruz, Cochabamba ou La Paz e está com tosse, resfriado ou dor de garganta:

- Evite se aproximar (ou seja, fique a > 3 metros de distância) enquanto conversa com essa pessoa.
- Lave as mãos por 20 segundos antes de tocar na boca, nariz e olhos.

Se você está com tosse, resfriado ou dor de garganta e veio de um local onde há uma epidemia como Santa Cruz, Cochabamba ou La Paz, você deve:

- Manter-se separado de sua família e do resto da comunidade por duas semanas até os sintomas da doença desaparecerem.
- Cubra o nariz e a boca quando tossir ou espirrar com um pano ou com o braço.
- Limpe qualquer objeto que você segure.

### **O que minha comunidade pode fazer para impedir a infecção?**

Não permita que pessoas que venham de outros lugares, onde a epidemia já exista, entrem em sua comunidade, independentemente de serem membros da família, amigos ou conhecidos.

### **O que acontece se essas pessoas entrarem?**

- Uma casa separada deverá ser construída onde eles permaneçam por duas semanas; se eles não desenvolverem sinais da doença, poderão entrar na comunidade.

### **E se houver uma pessoa com coronavírus na minha comunidade?**

- Outra casa separada também deve ser construída, pois deve levar duas semanas até que a doença desapareça.
- O paciente deve ter seu próprio prato, copo e colher, rede mosquiteira e roupas, local para ir ao banheiro e sabão para lavar o corpo, pratos e roupas. Se eles podem cozinhar sozinhos, podem receber comida para cozinhar; se não puderem cozinhar para si mesmos, deverão ser servidos no próprio prato. O cuidador deve ter cuidado para não contrair a doença, por exemplo, sempre lavando as mãos depois de fornecer comida para o paciente.
- Finalmente, se por algum motivo a doença chegar à comunidade, os residentes saudáveis - principalmente os idosos - devem deixar a comunidade até a doença desaparecer.
